# Supplementary material for: Investigation of Potential Amorphisation and Co-Amorphisation Behaviour of the Benzene Di-Carboxylic Acids upon Cryo-Milling
Source: MDPI journal article supplement (doi:10.3390/molecules24213990), 2019-11-05

TPA

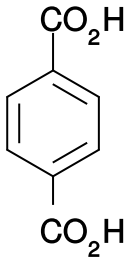

IPA

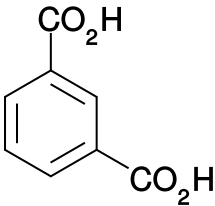

PA

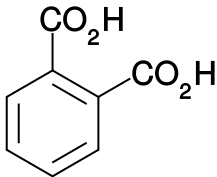

**a) Terephthalic acid**

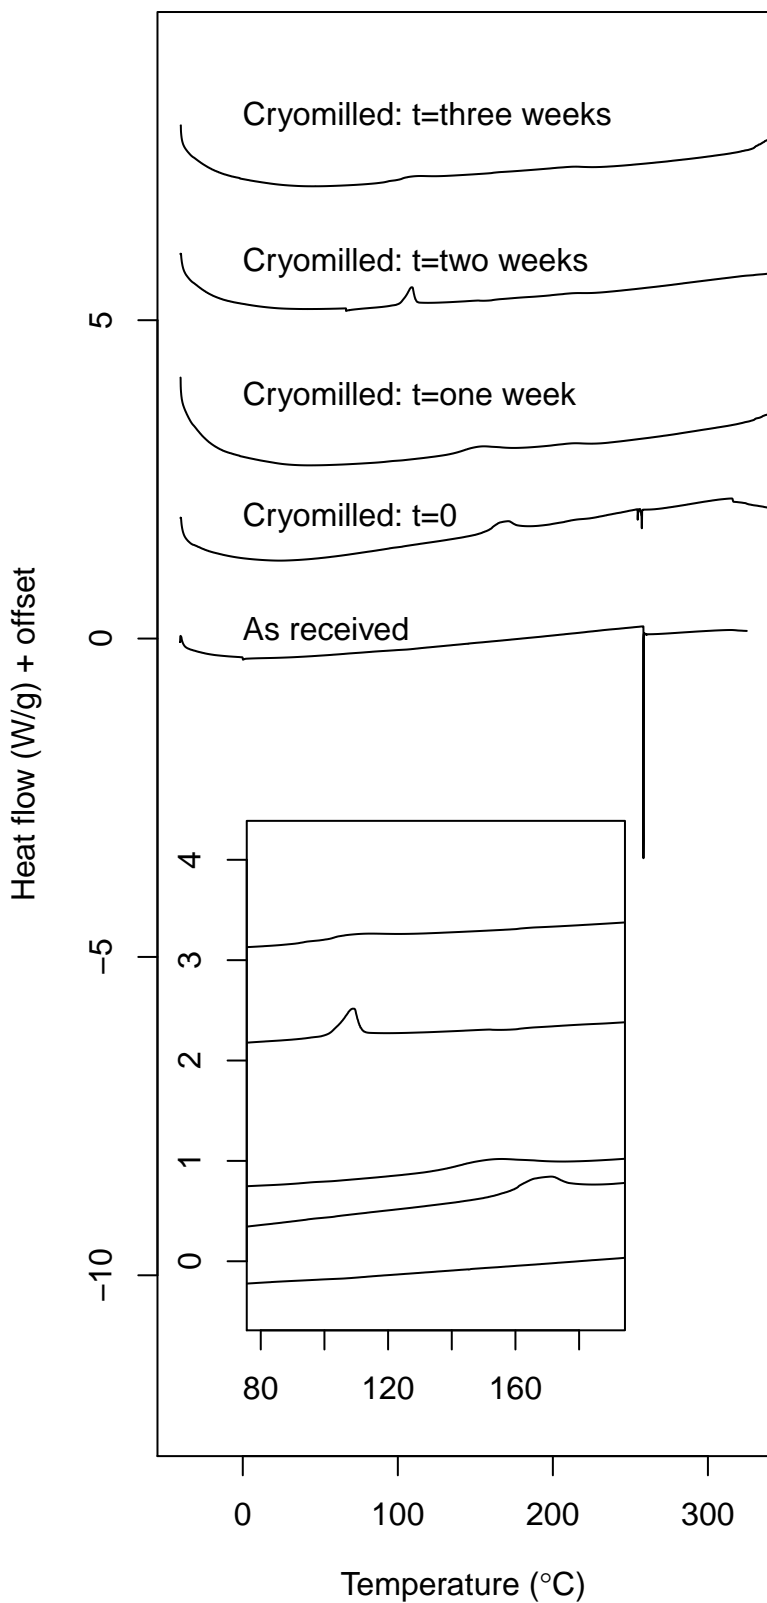

**b) Isophthalic acid**

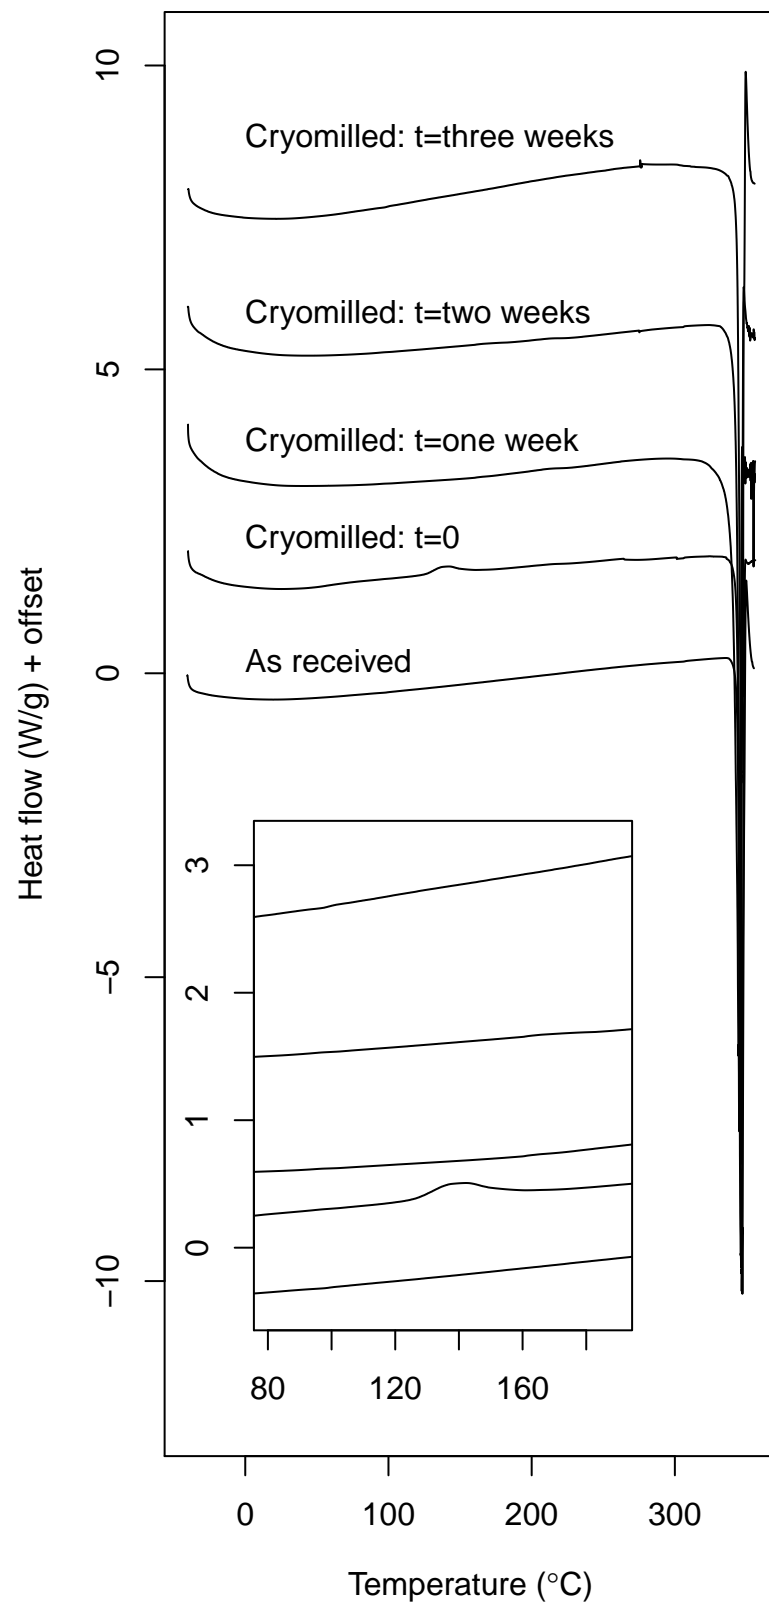

**c) Phthalic acid**

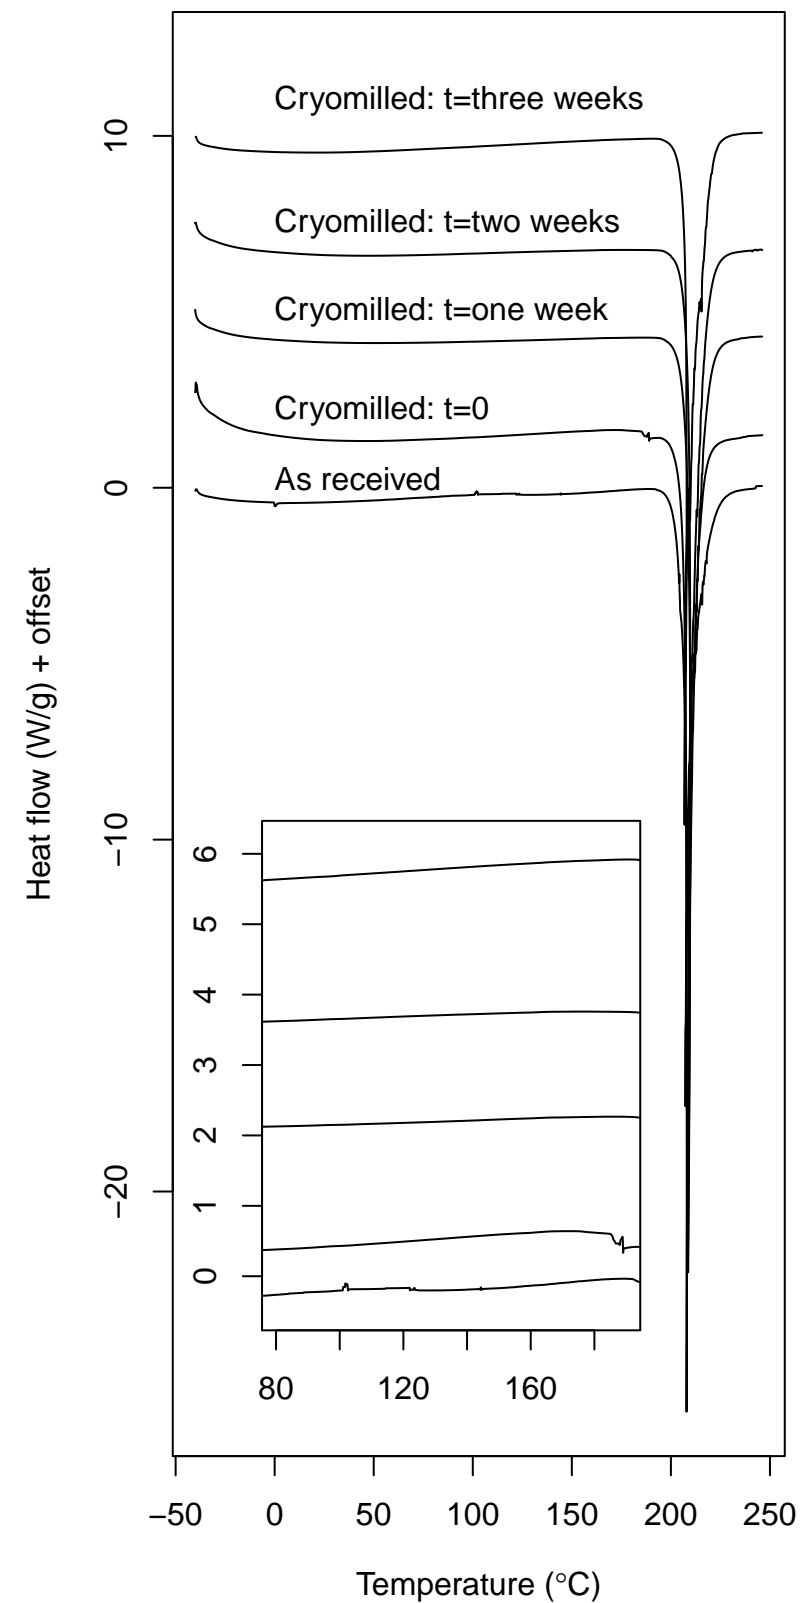

**a) Terephthalic acid**

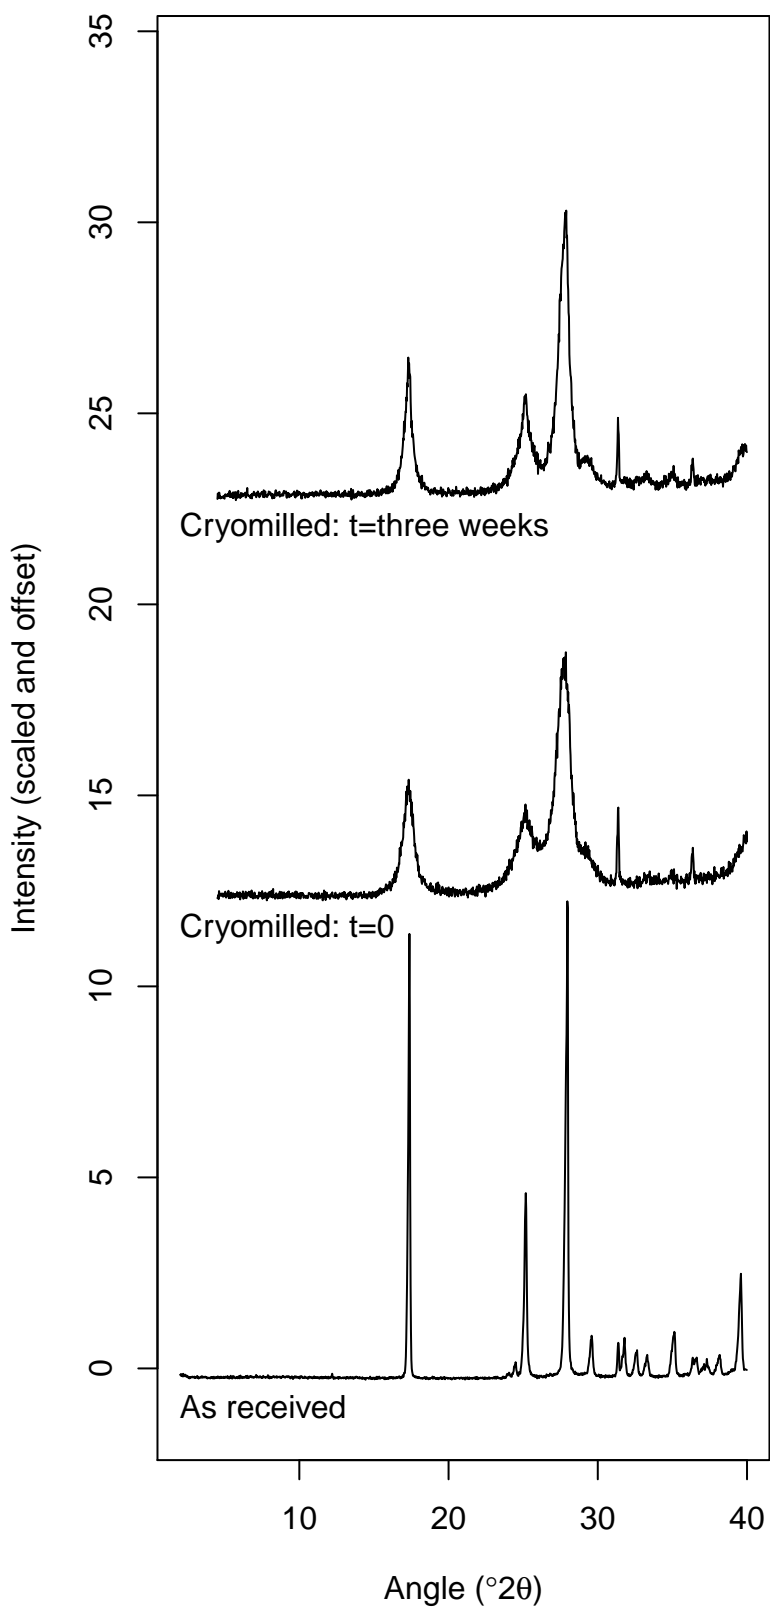

**b) Isophthalic acid**

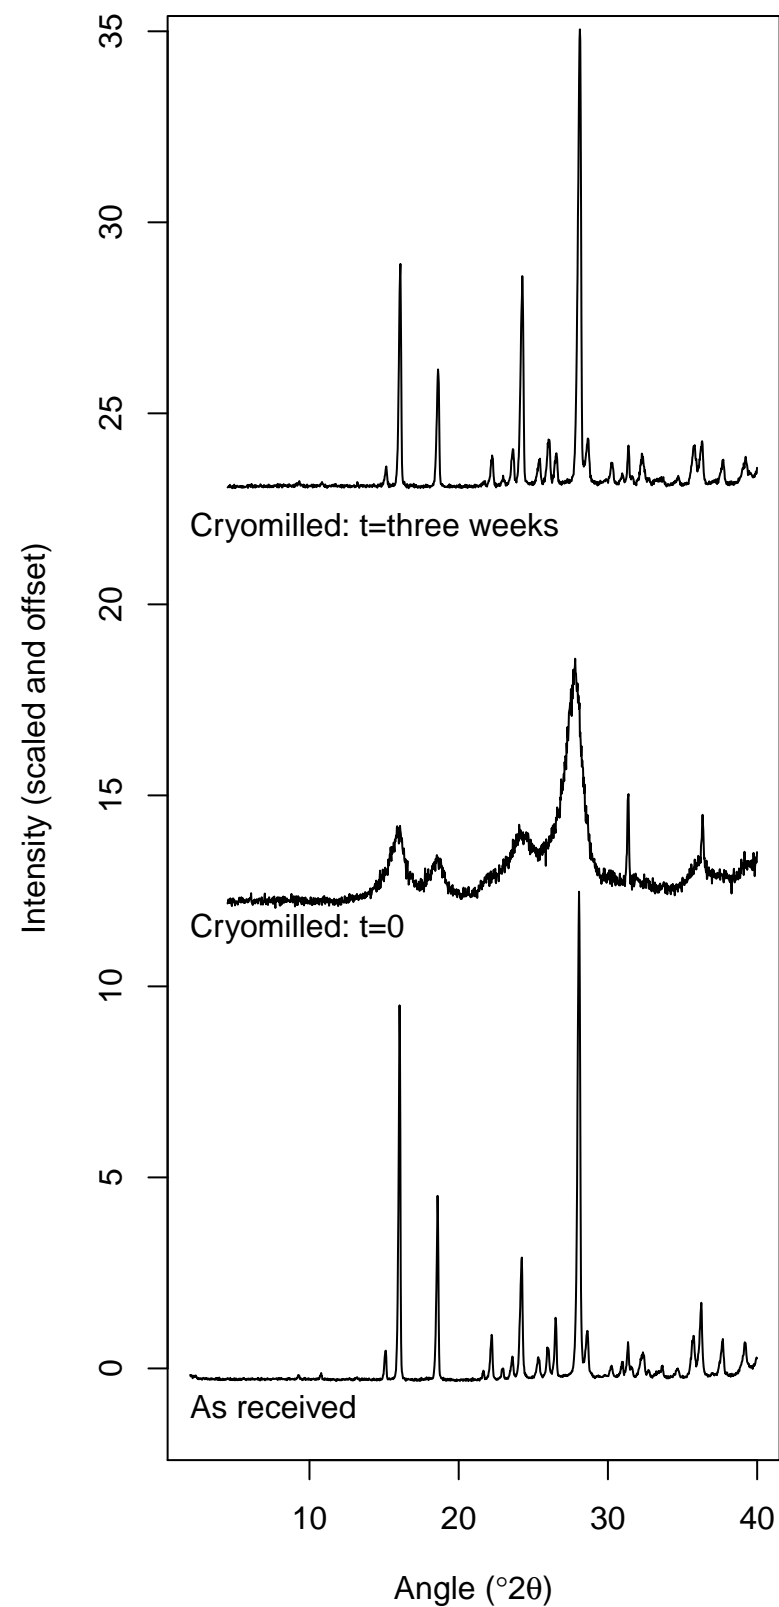

**c) Phthalic acid**

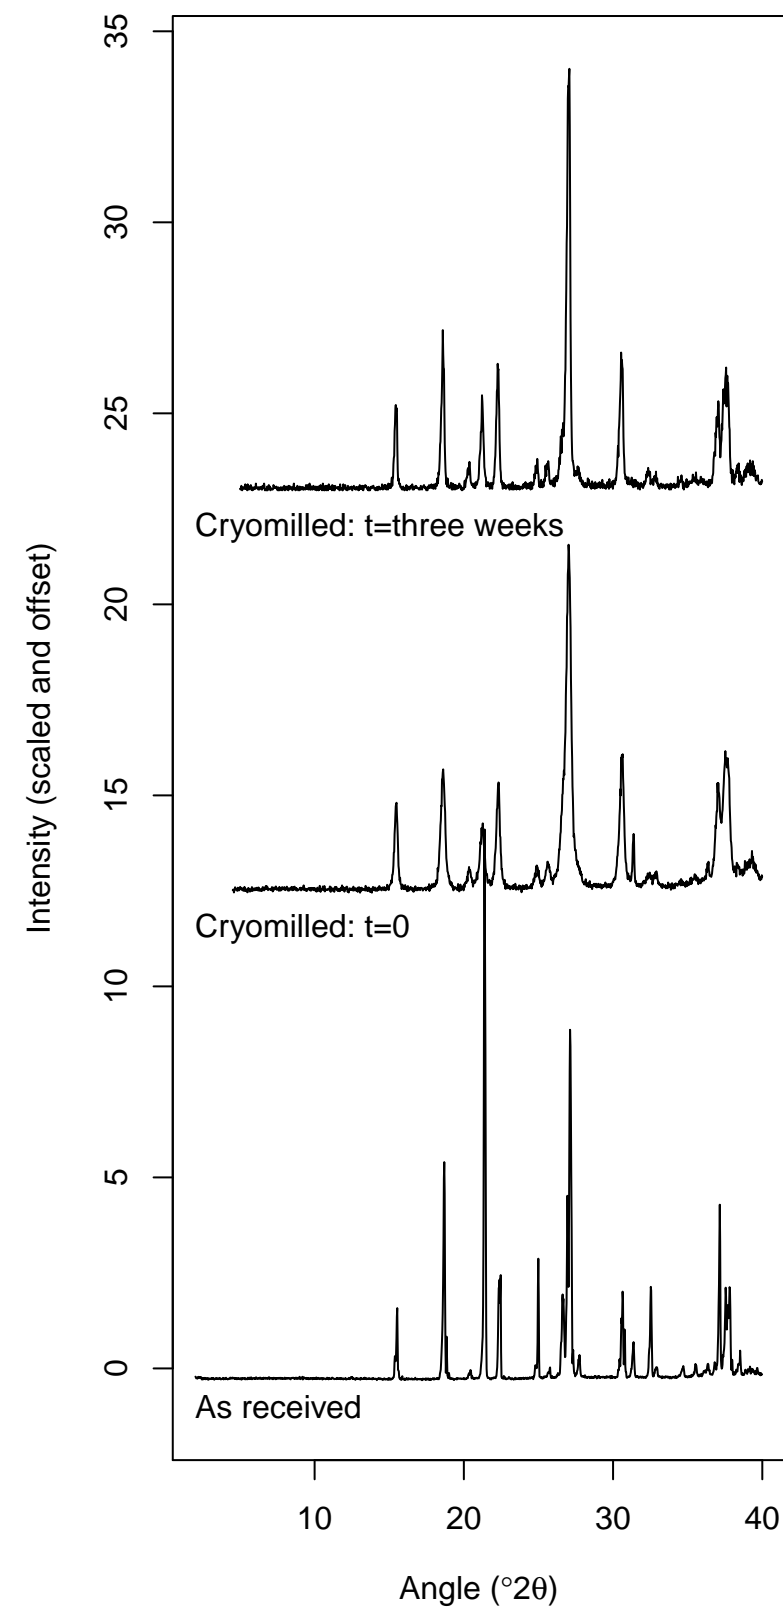

**Terephthalic acid**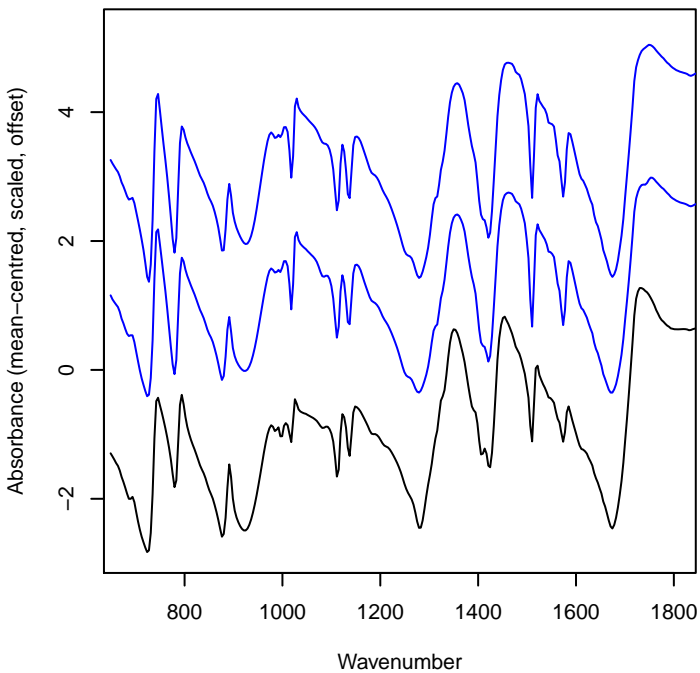**Isophthalic acid**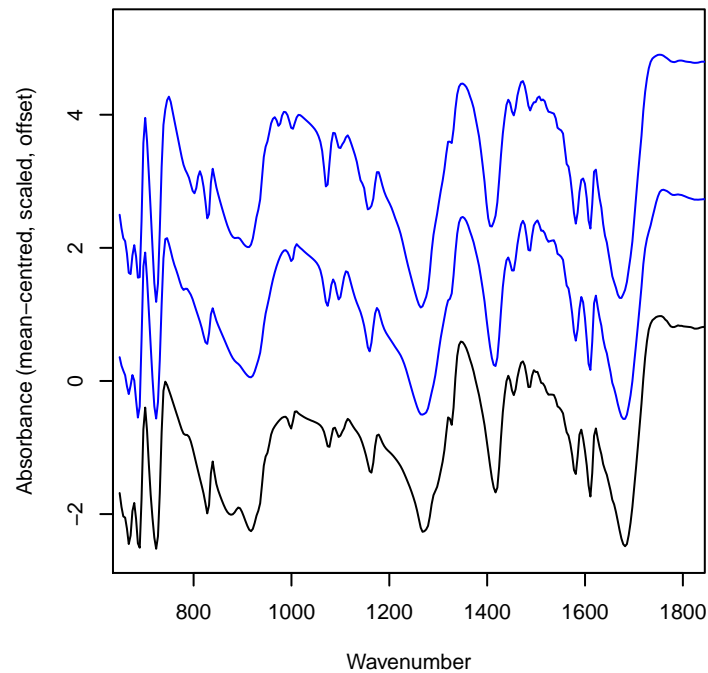**Phthalic acid**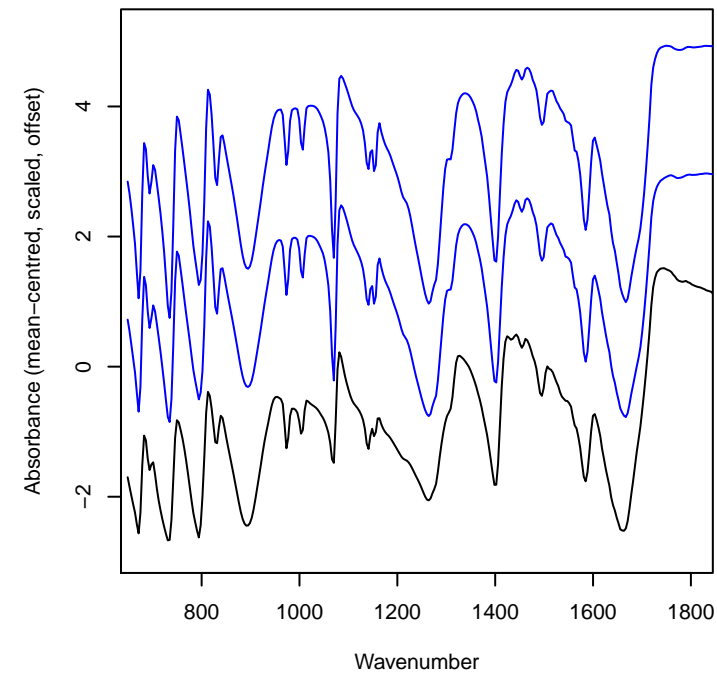**Terephthalic acid**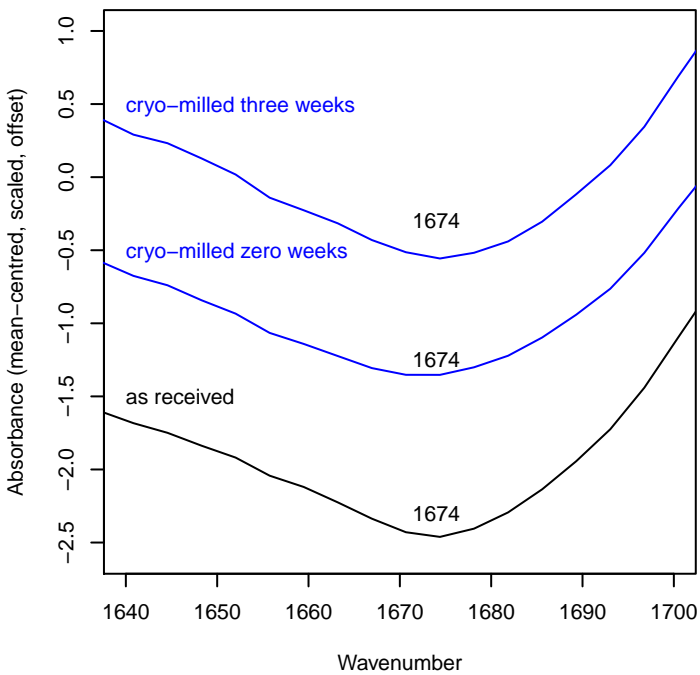**Isophthalic acid**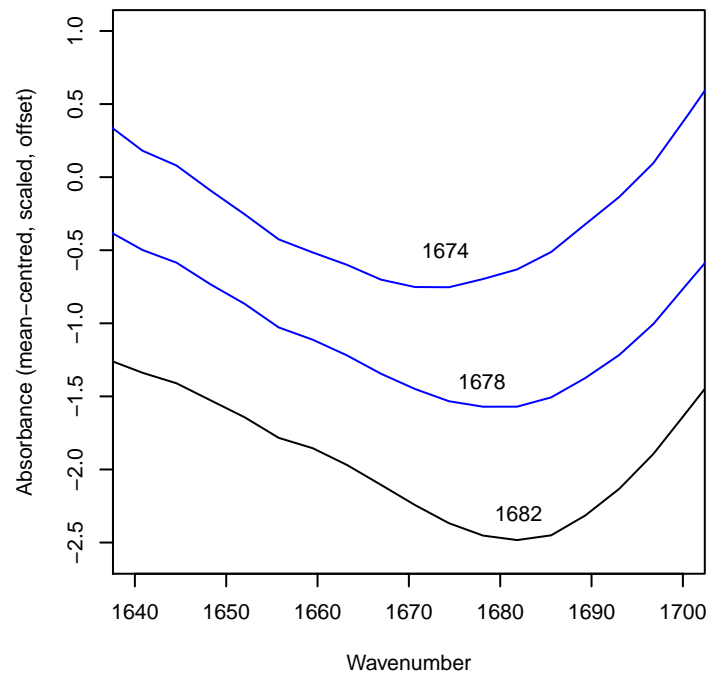**Phthalic acid**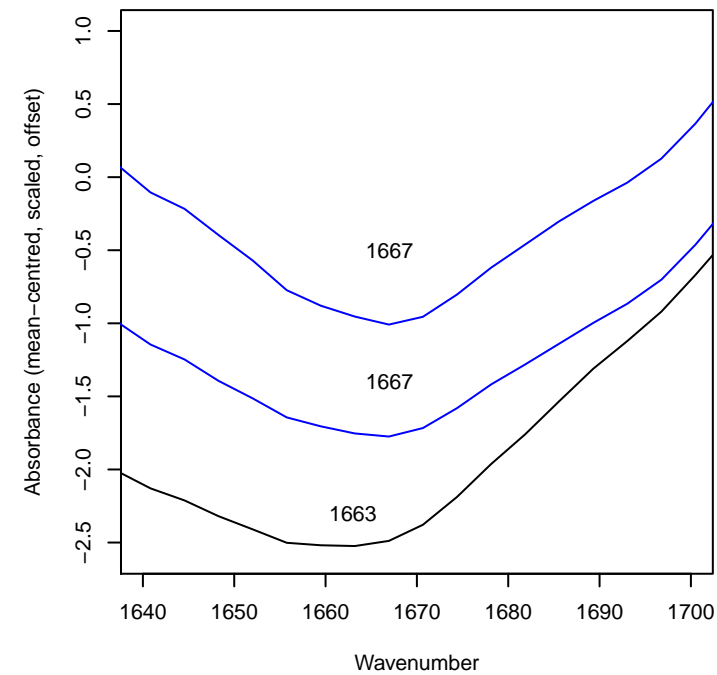

**a) Terephthalic + isophthalic acid**

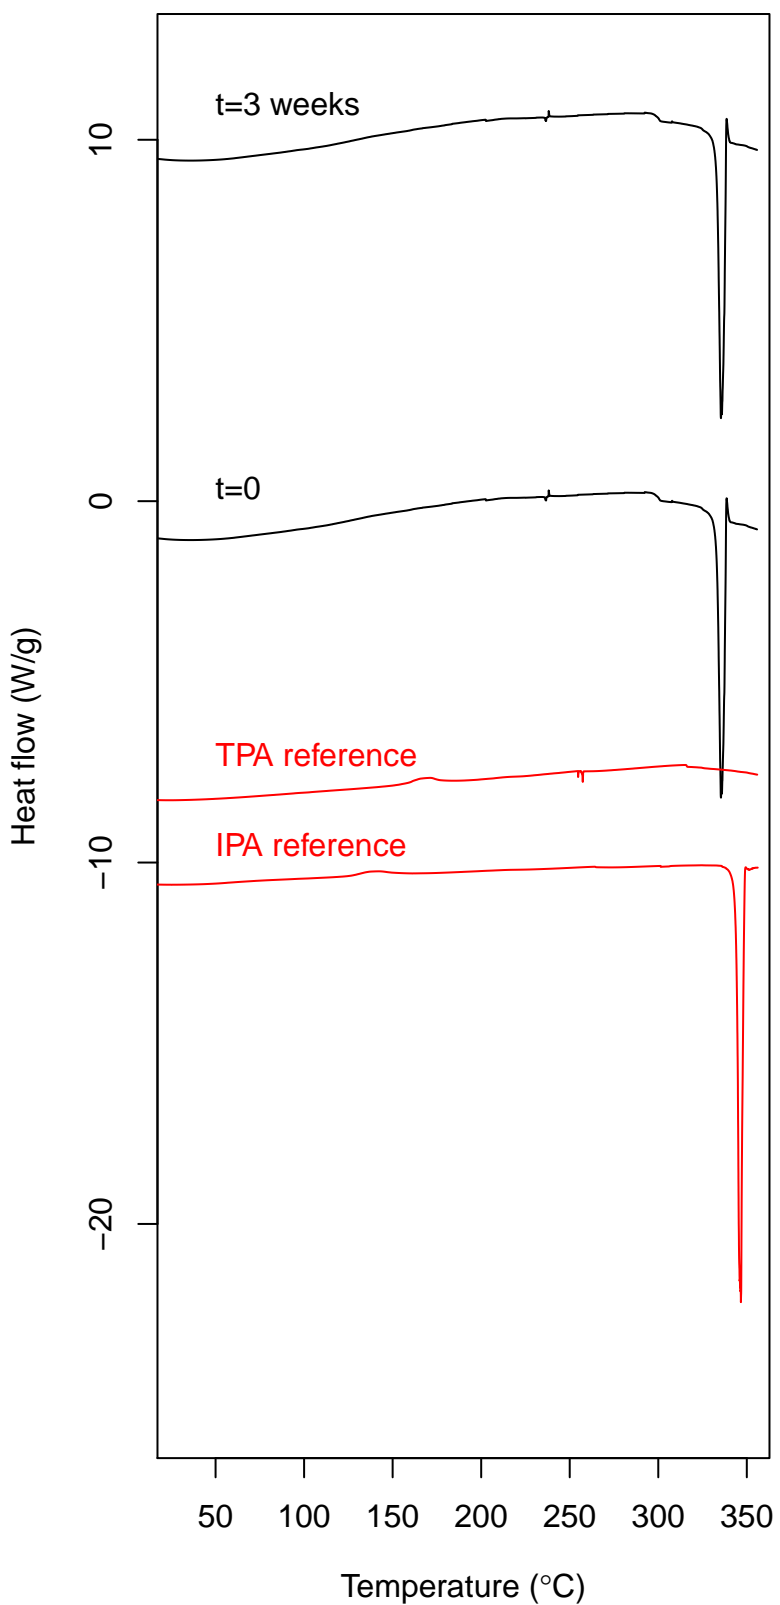

**b) Terephthalic + phthalic acid**

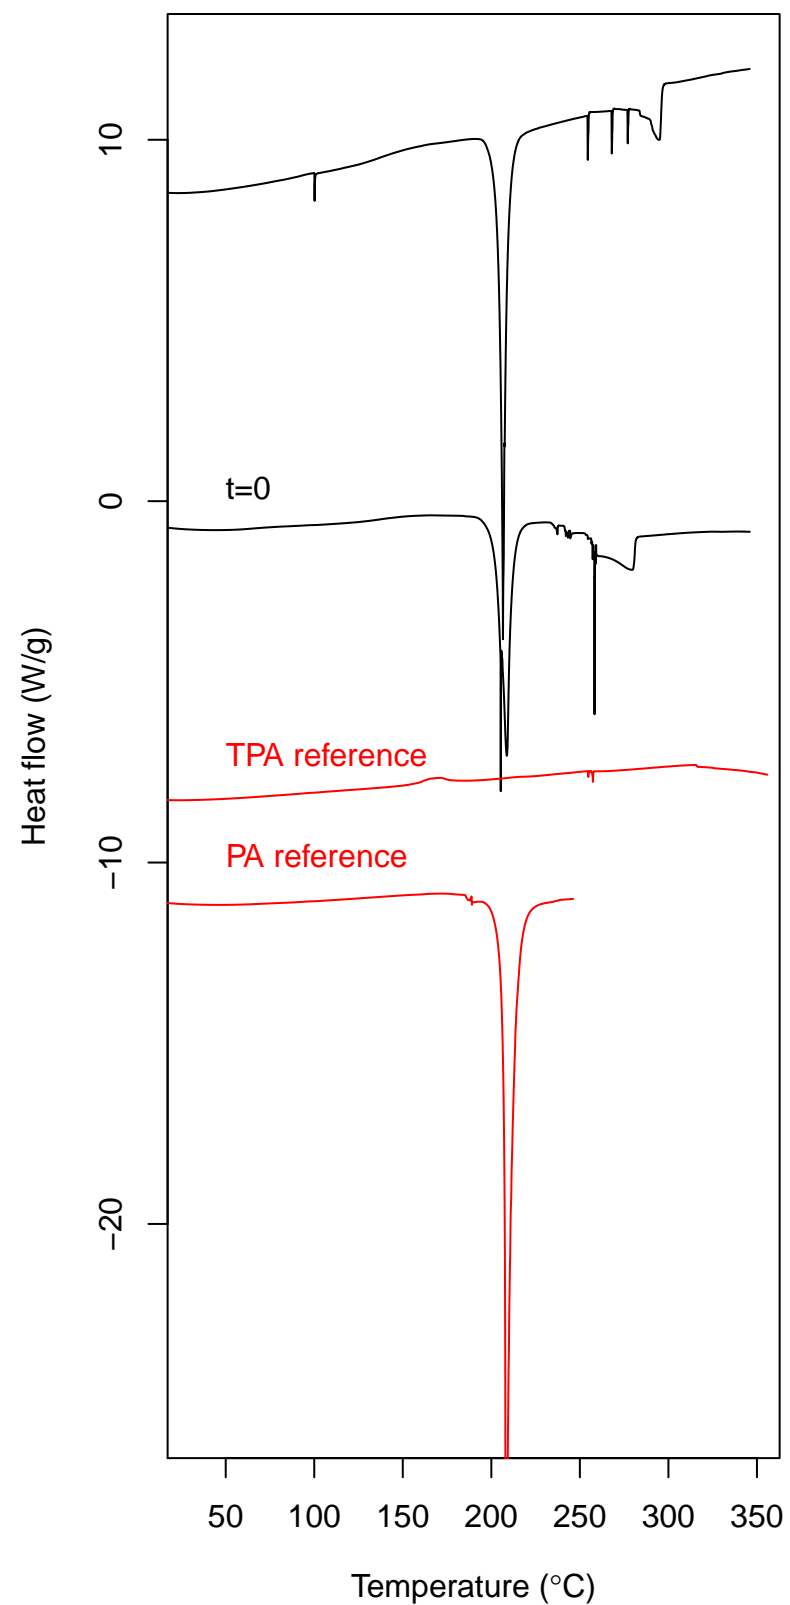

**c) Isophthalic + phthalic acid**

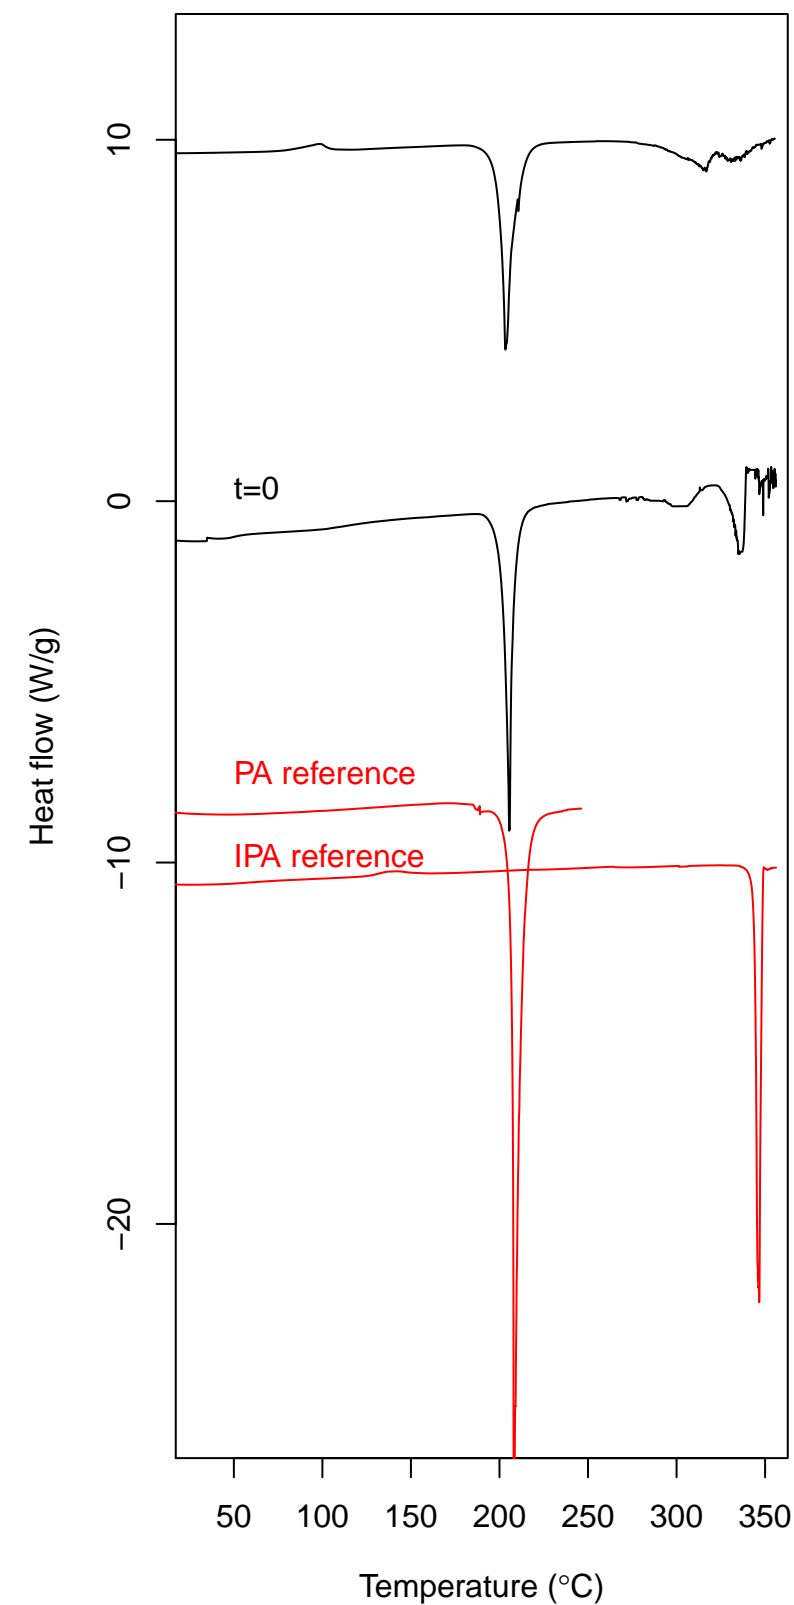

**a) Terephthalic and isophthalic**

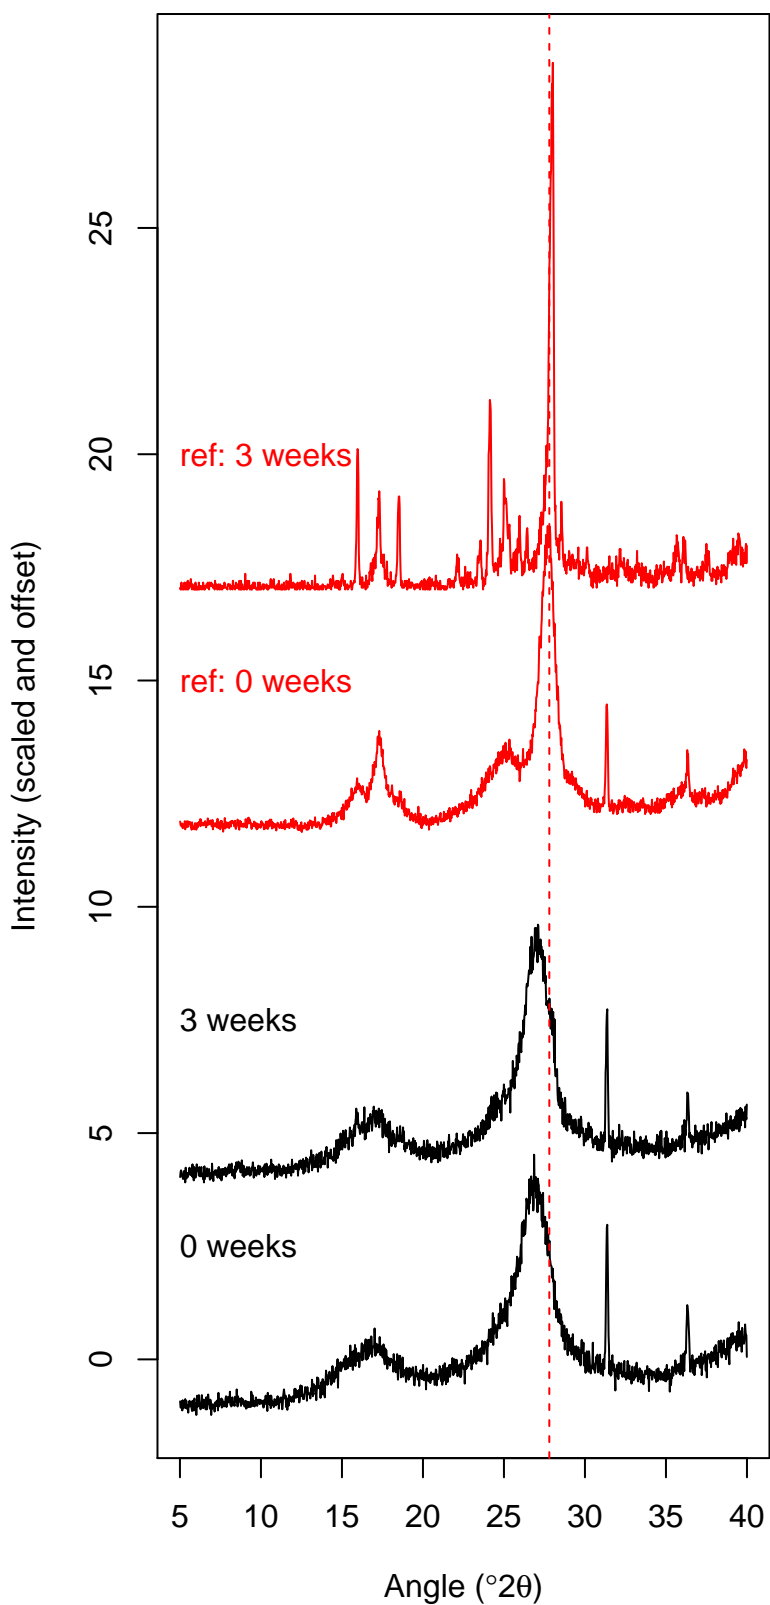

**b) Terephthalic and phthalic**

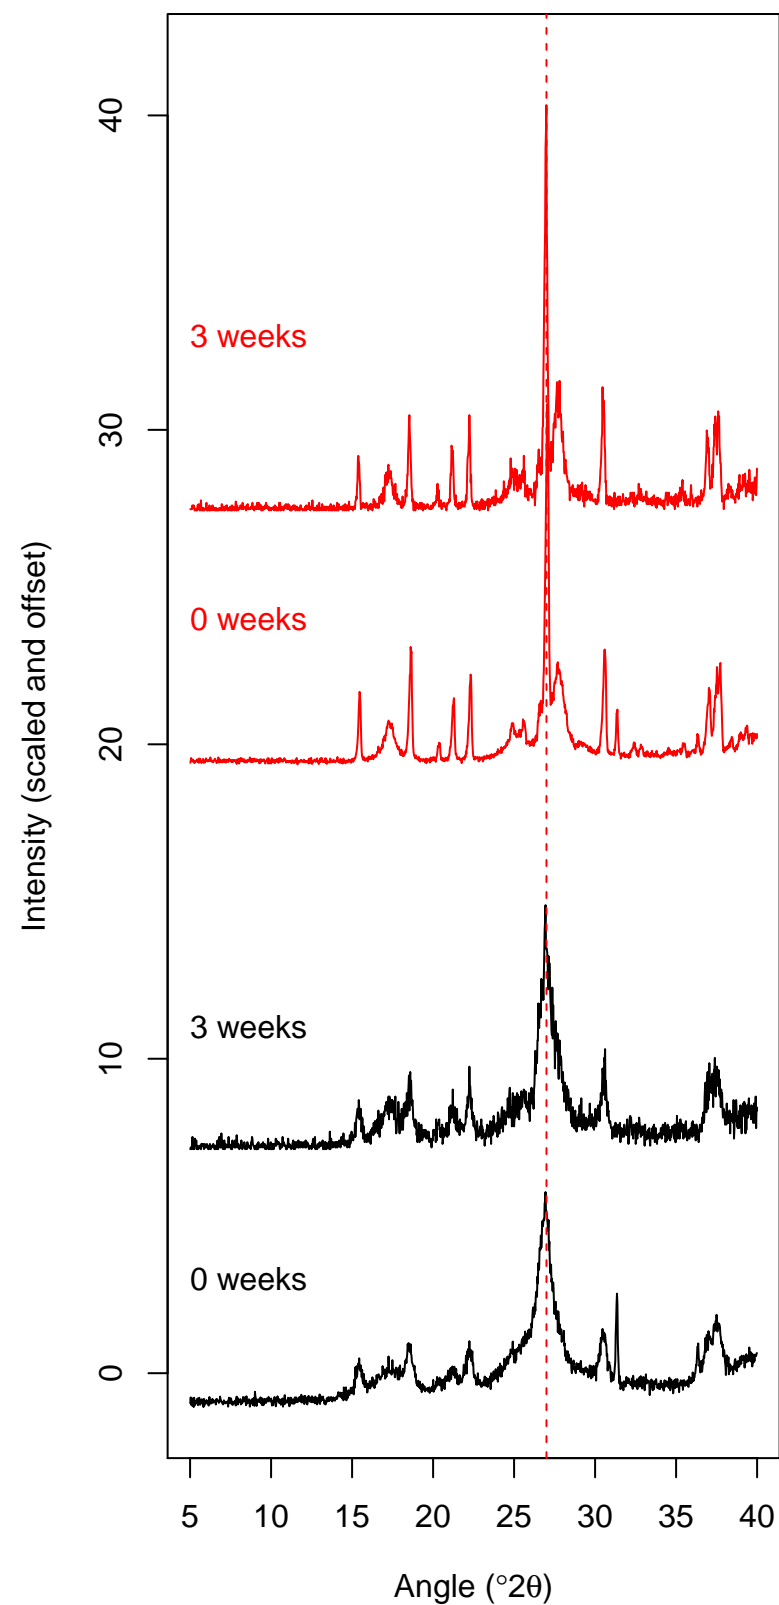

**c) Isophthalic and phthalic**

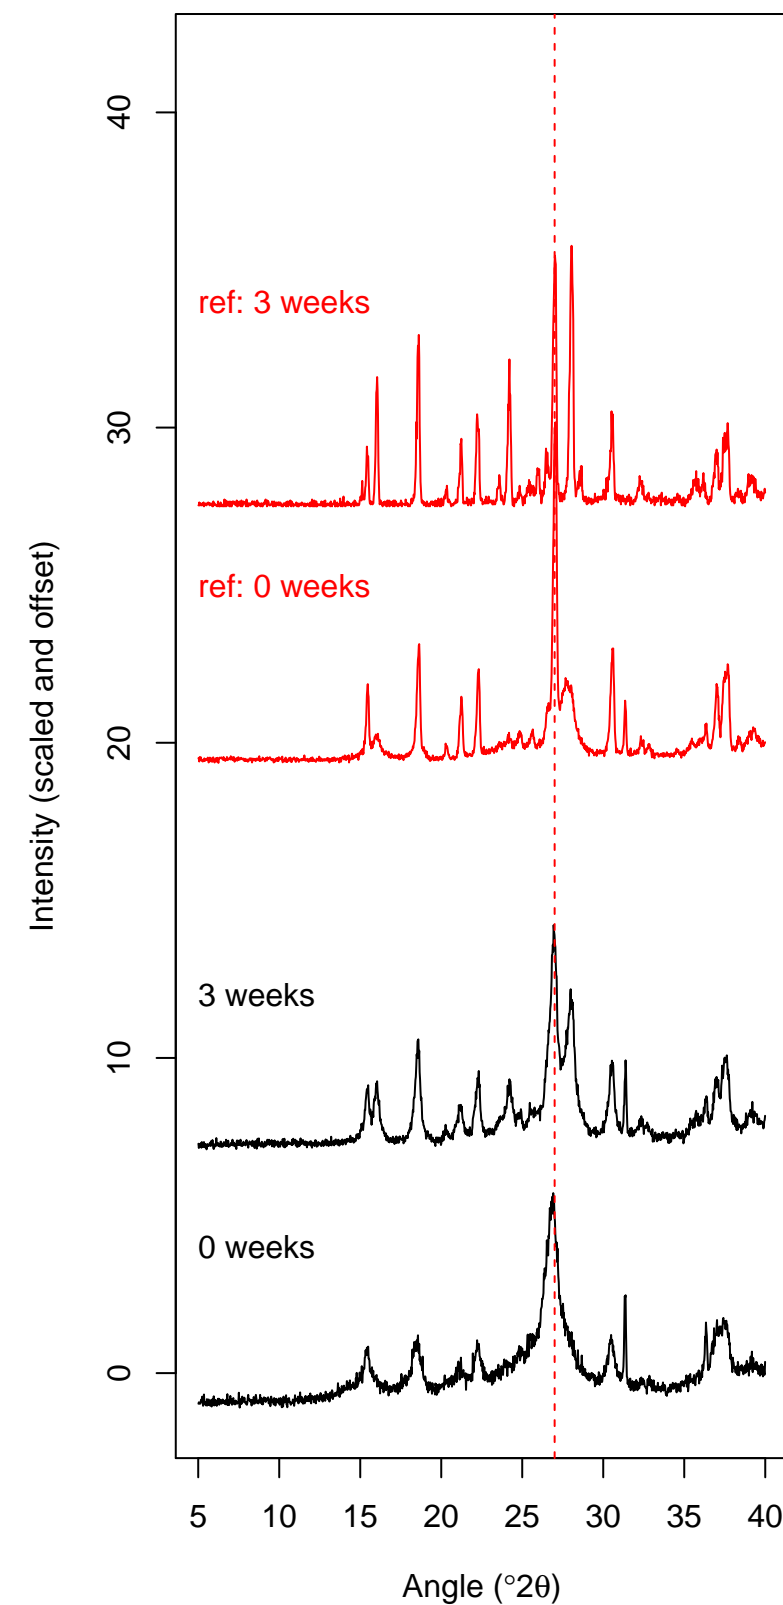

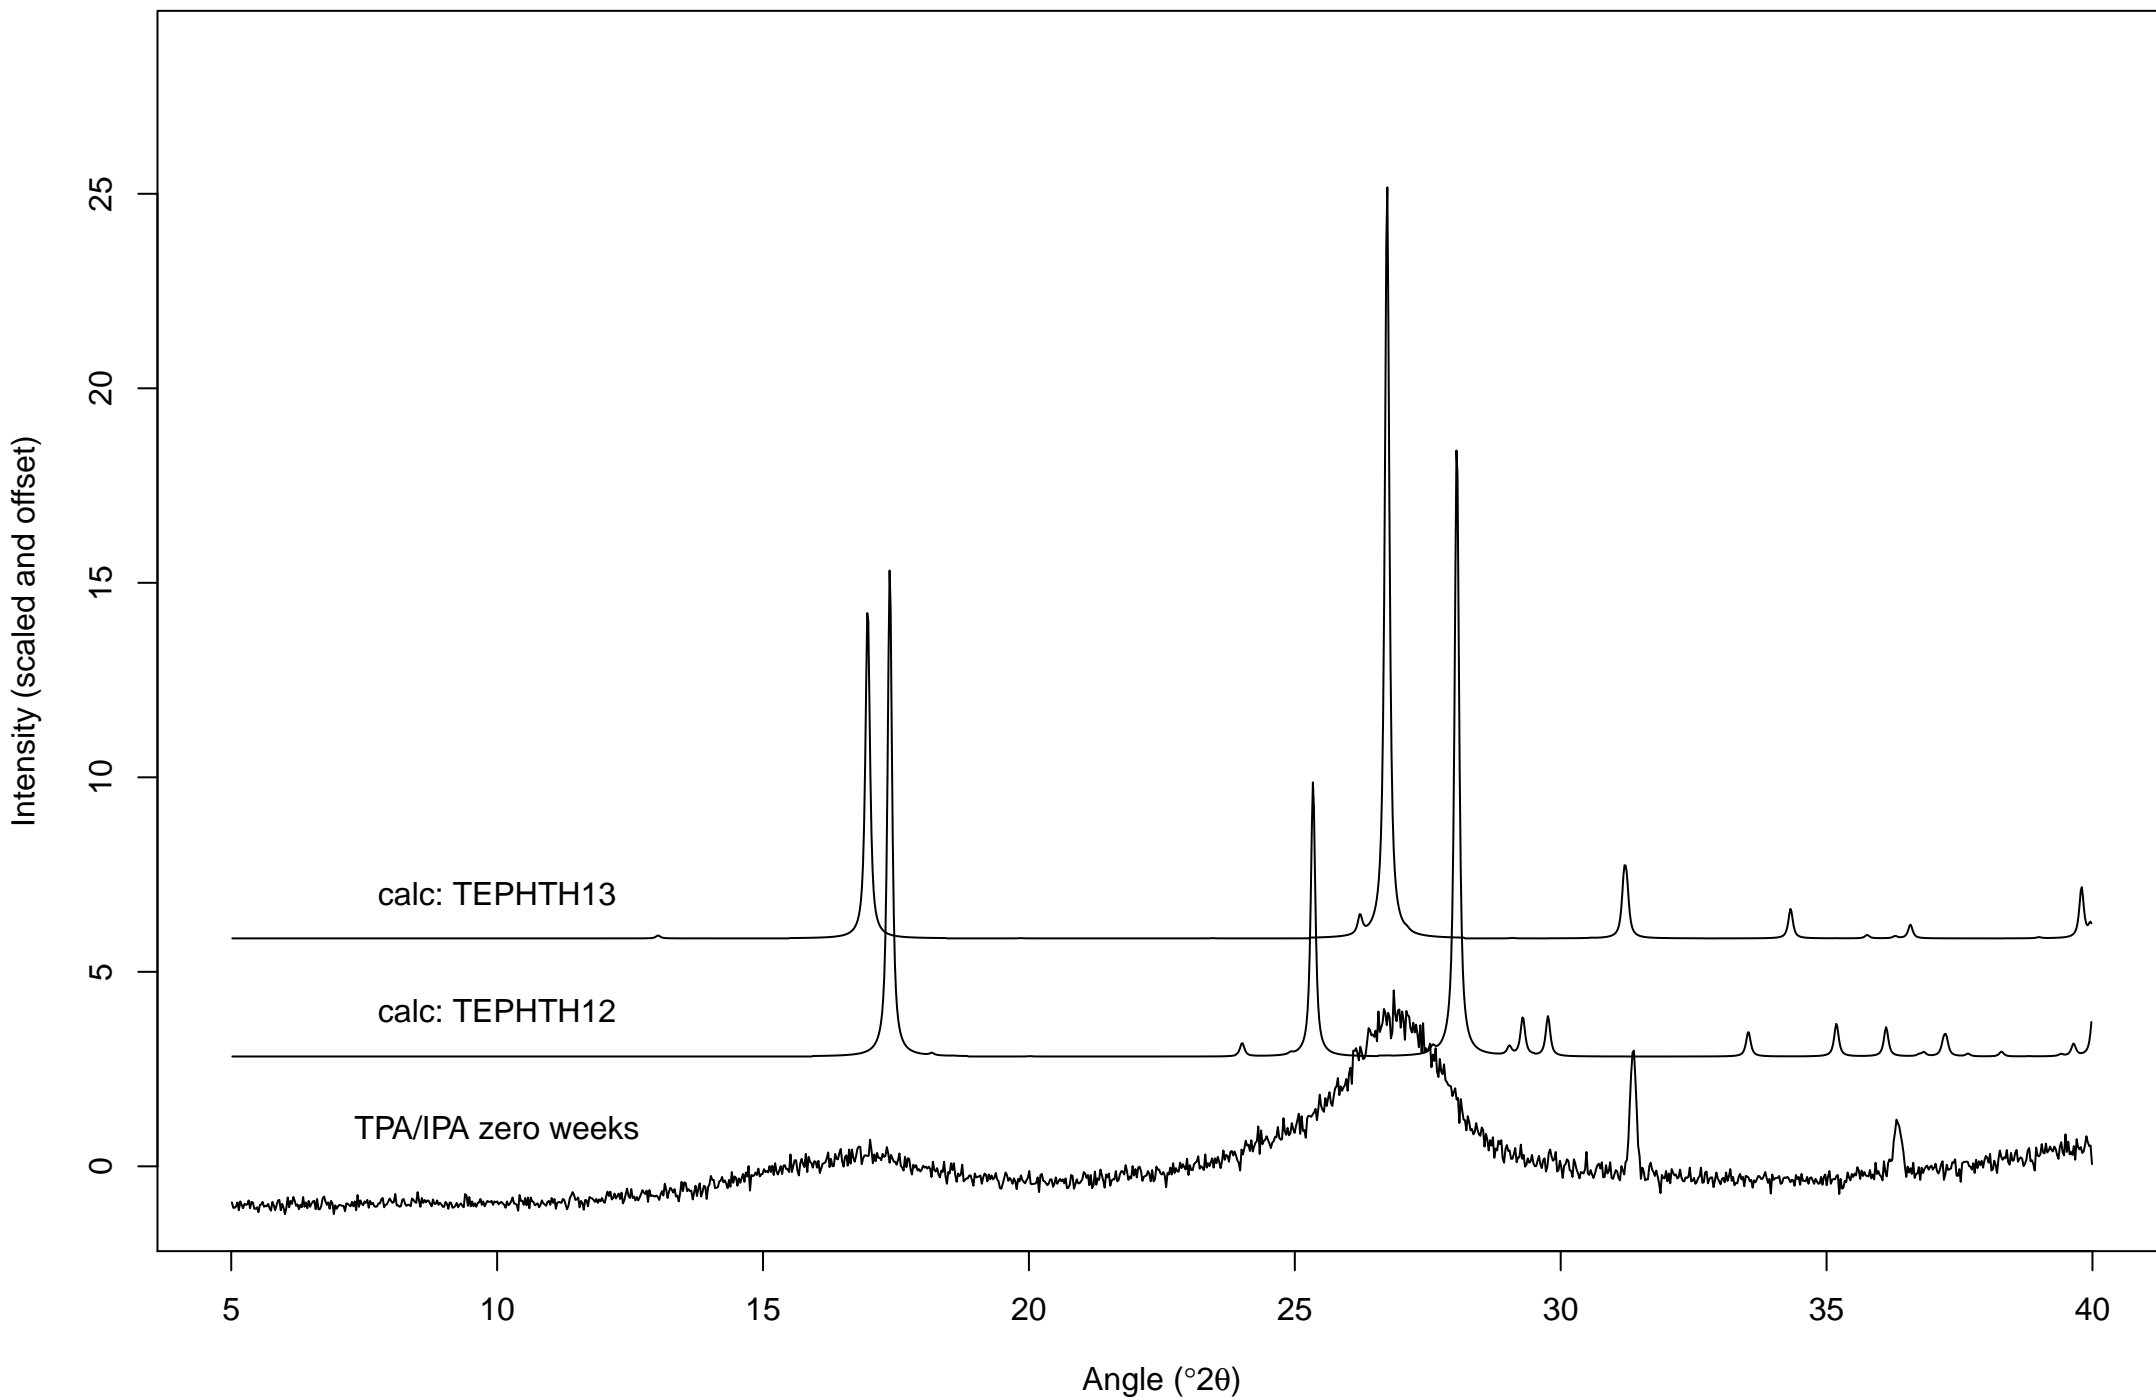

Supplement: s1 [file s1]
