# Supplementary material for: Investigation of Potential Amorphisation and Co-Amorphisation Behaviour of the Benzene Di-Carboxylic Acids upon Cryo-Milling
Source: MDPI journal article supplement (doi:10.3390/molecules24213990), 2019-11-05

TPA/IPA co-cryo-milled

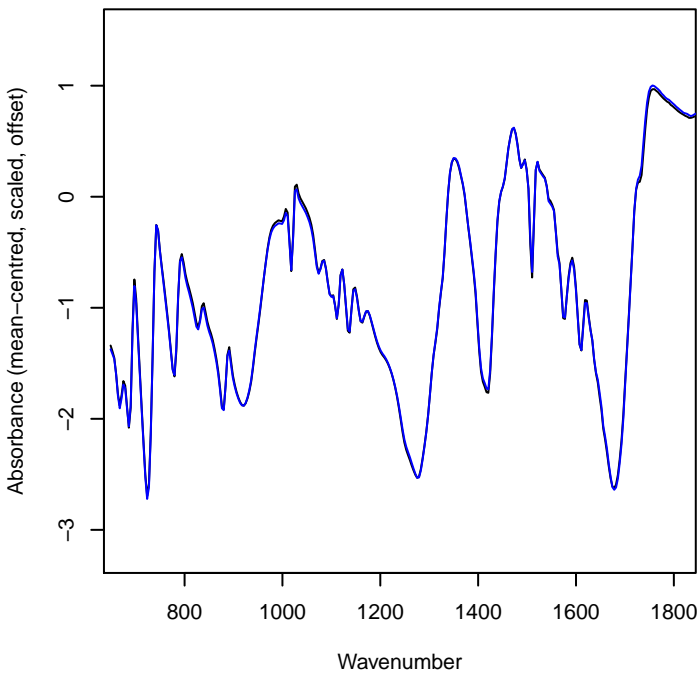

TPA/PA co-cryo-milled

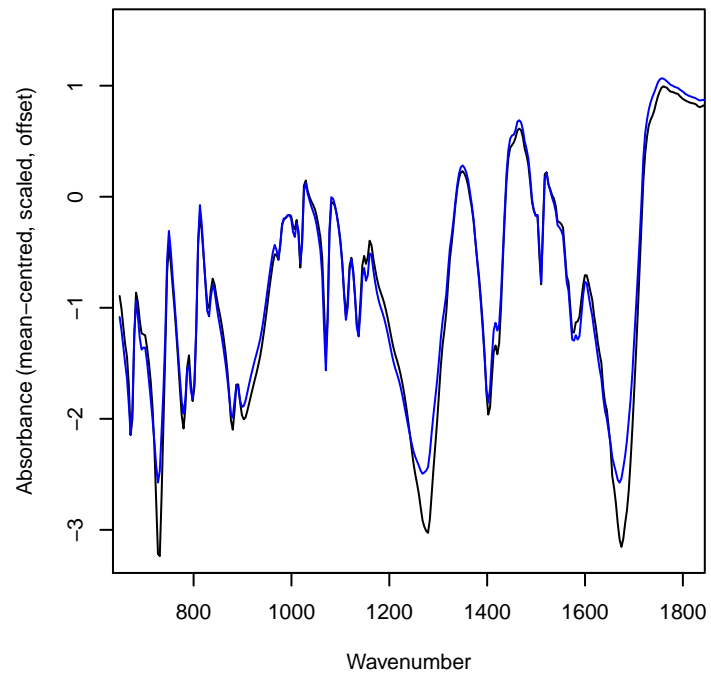

IPA/PA co-cryo-milled

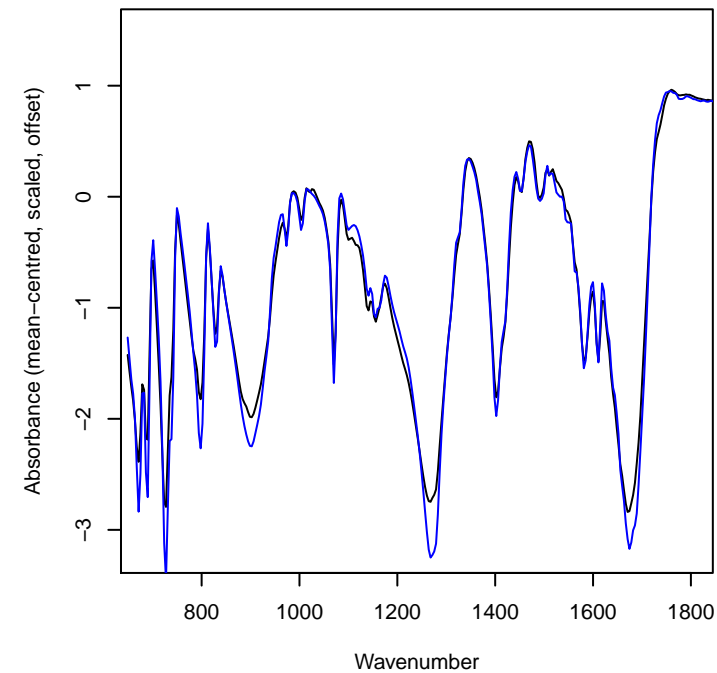

TPA/IPA co-cryo-milled

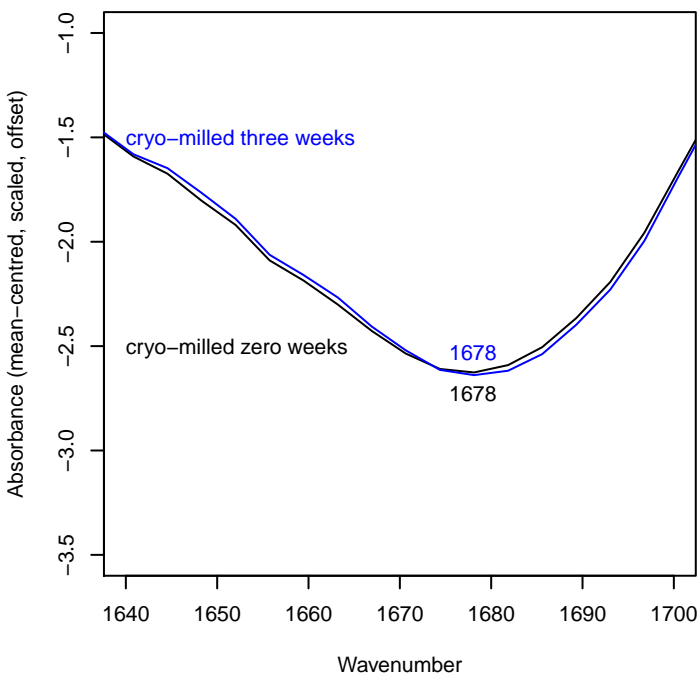

TPA/PA co-cryo-milled

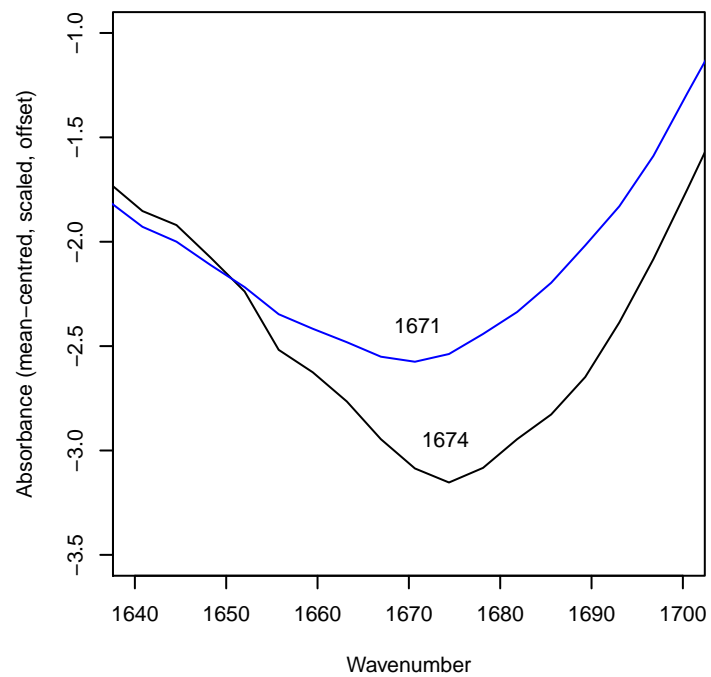

IPA/PA co-cryo-milled

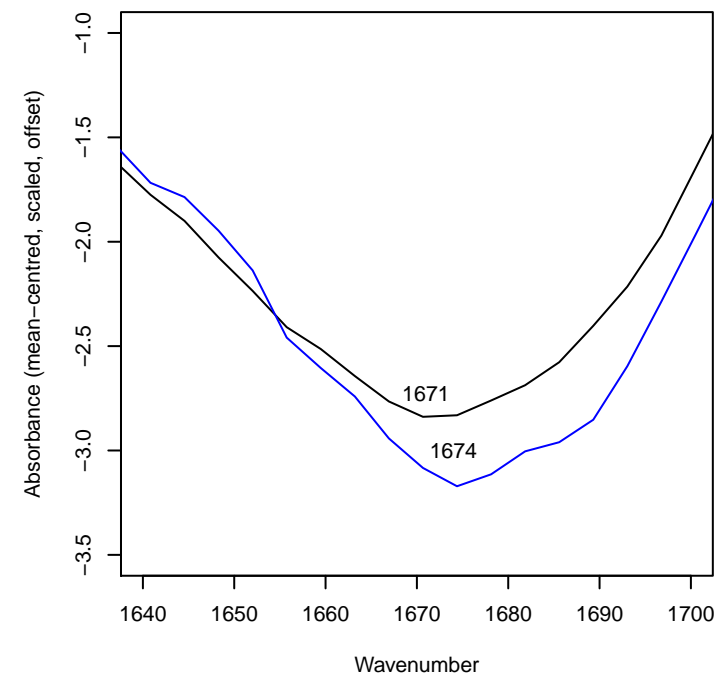

TPA/IPA cryo-milled separately

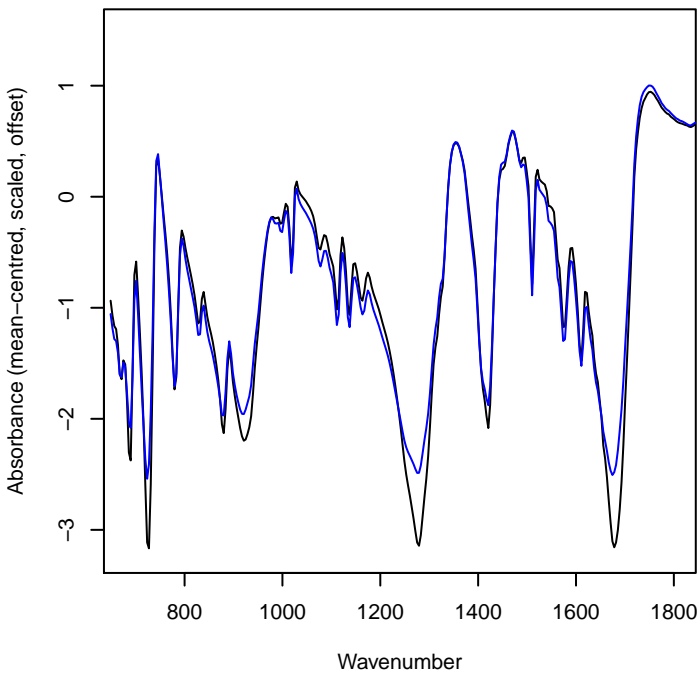

TPA/PA cryo-milled separately

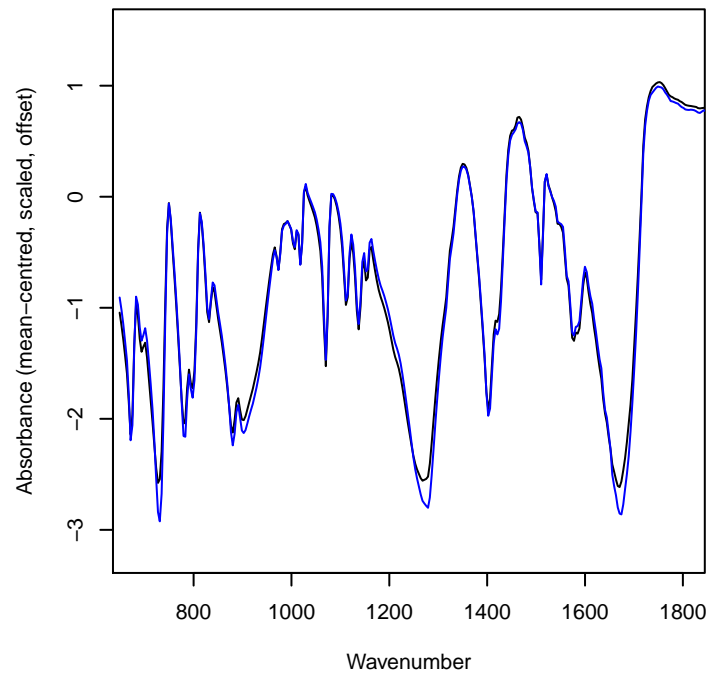

IPA/PA cryo-milled separately

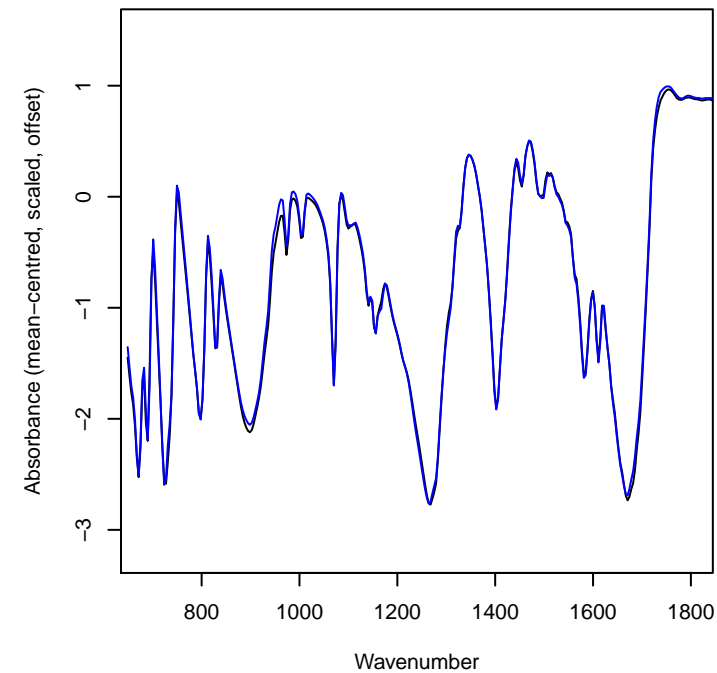

TPA/IPA cryo-milled separately

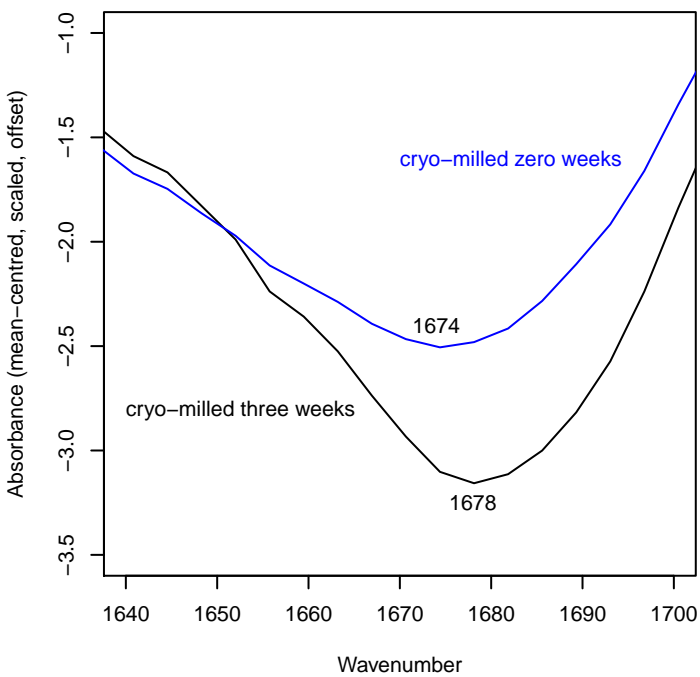

TPA/PA cryo-milled separately

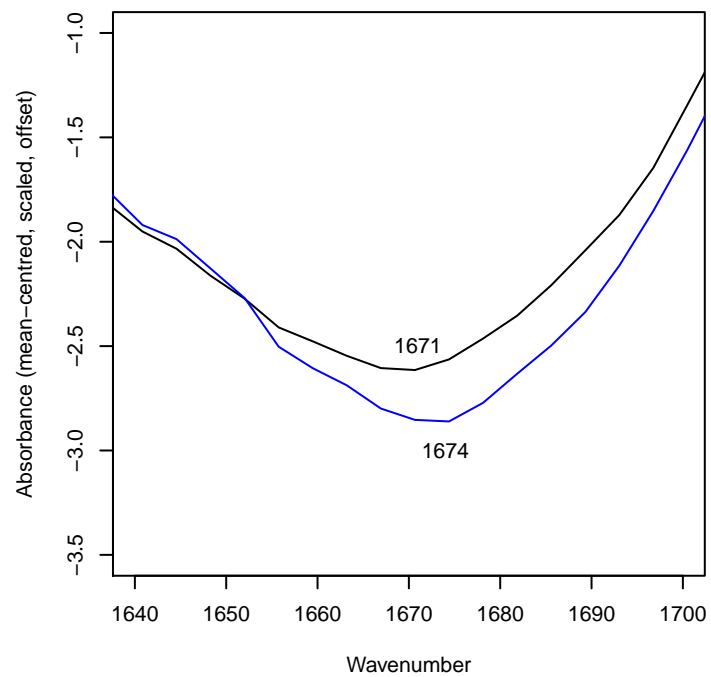

IPA/PA cryo-milled separately

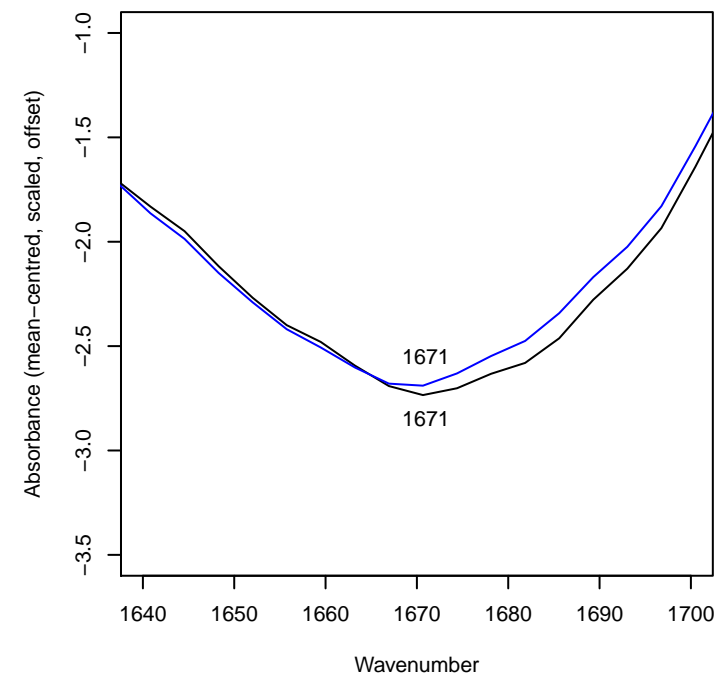

TPA/IPA co vs separate, zero weeks

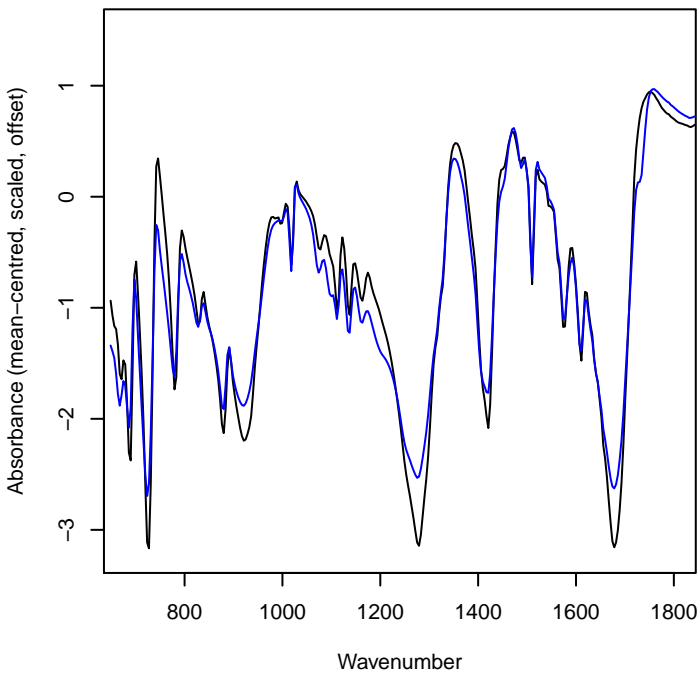

TPA/PA co vs separate, zero weeks

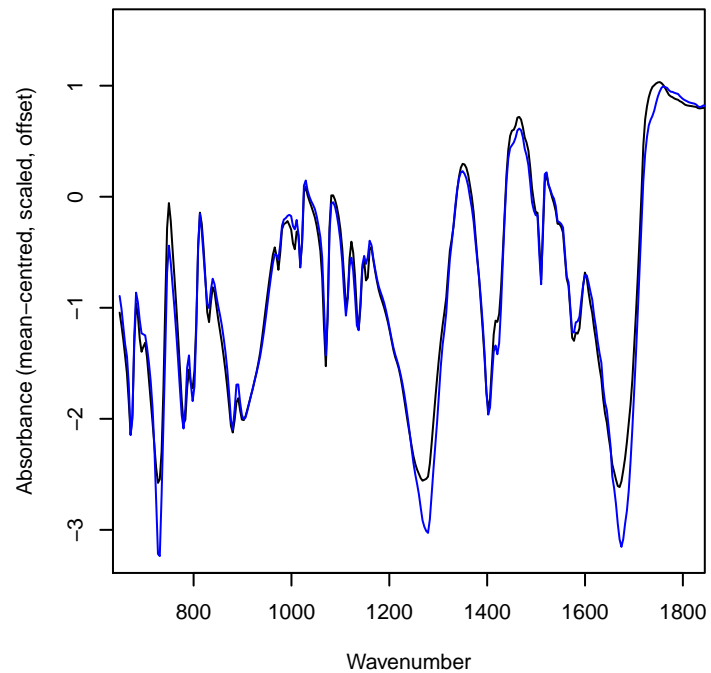

IPA/PA – co vs separate, zero weeks

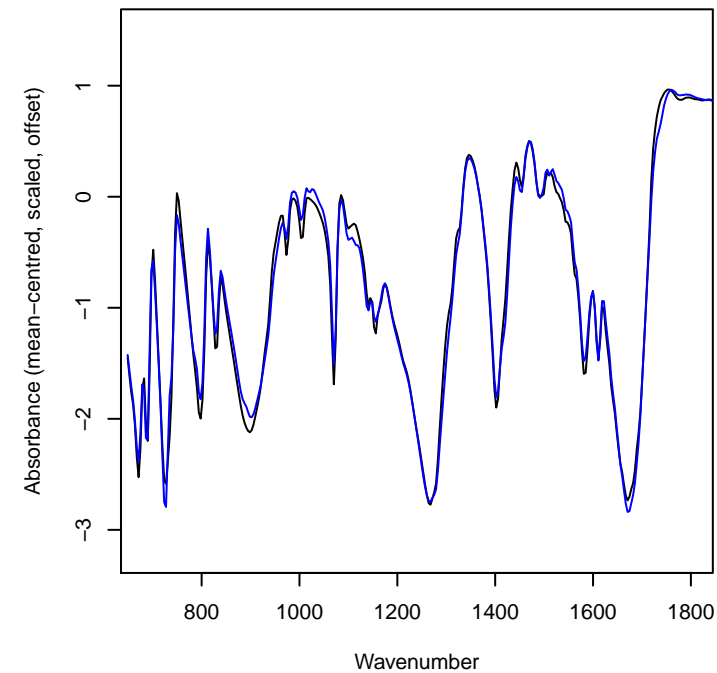

TPA/IPA co vs separate, zero weeks

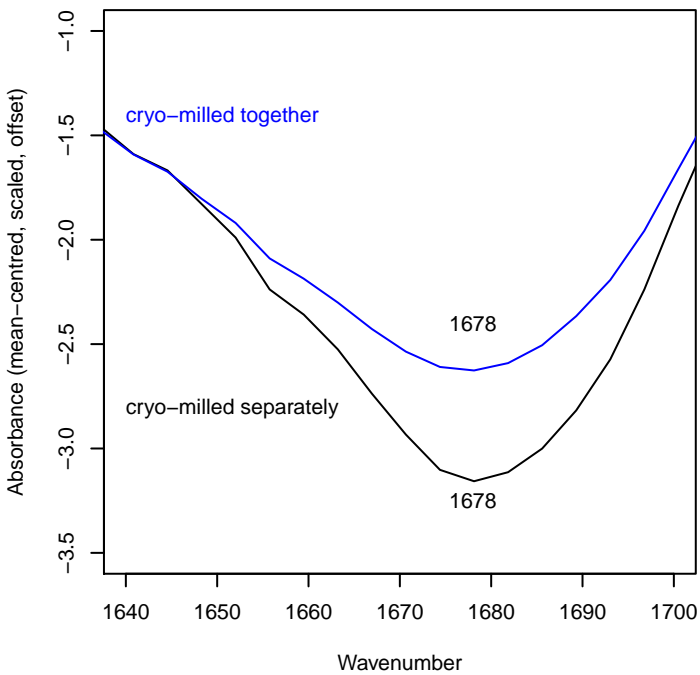

TPA/PA co vs separate, zero weeks

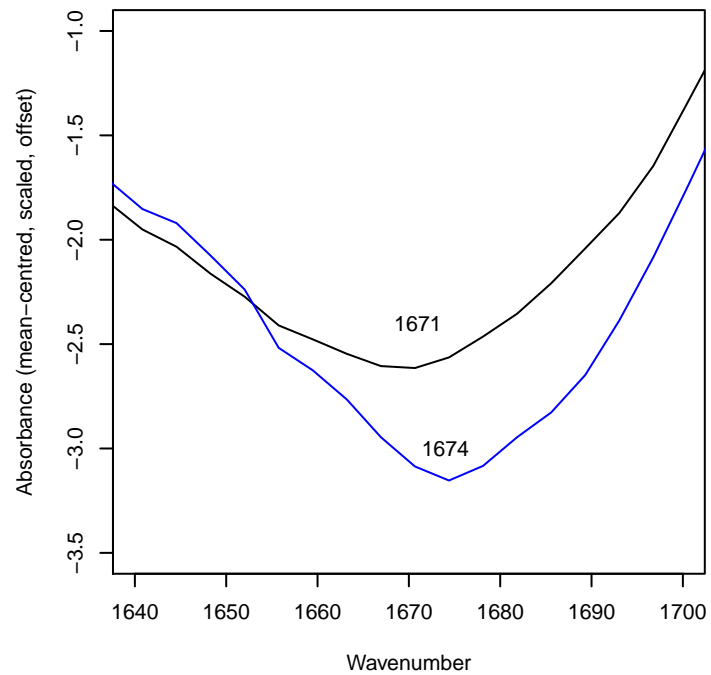

IPA/PA co vs separate, zero weeks

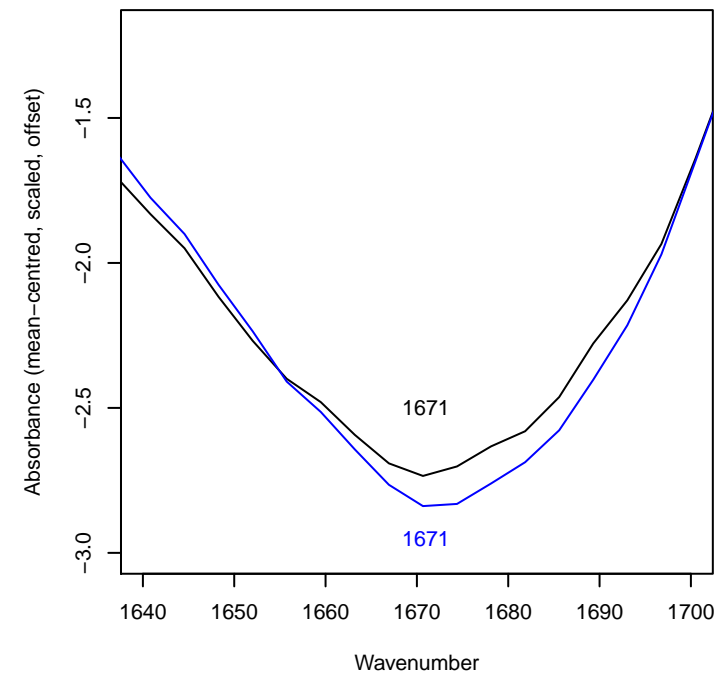

TPA/IPA, as-rec vs co-cryo-milled, zero weeks

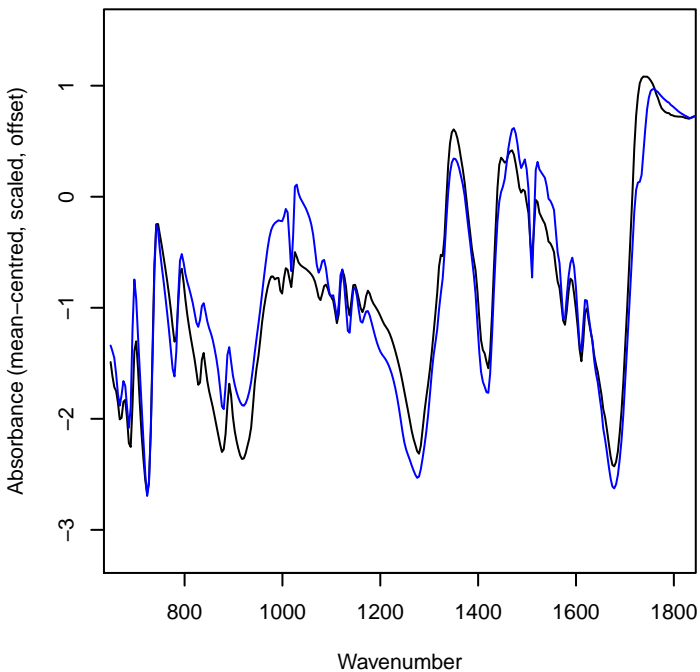

TPA/PA, as-rec vs co-cryo-milled, zero weeks

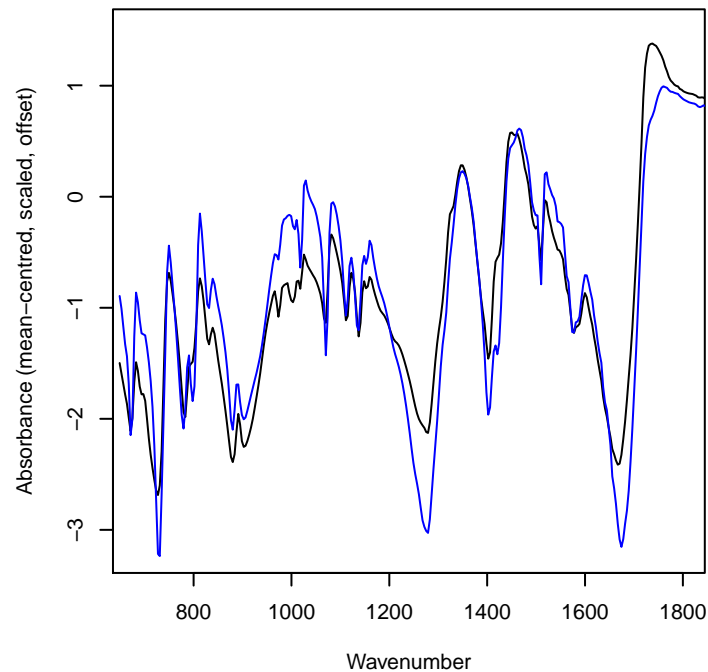

IPA/PA, as-rec vs co-cryo-milled, zero weeks

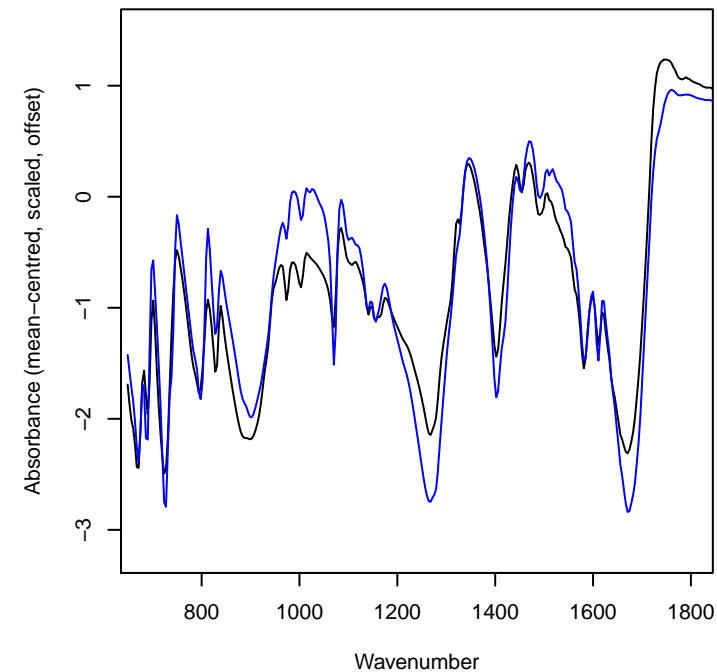

TPA/IPA, as-rec vs co-cryo-milled, zero weeks

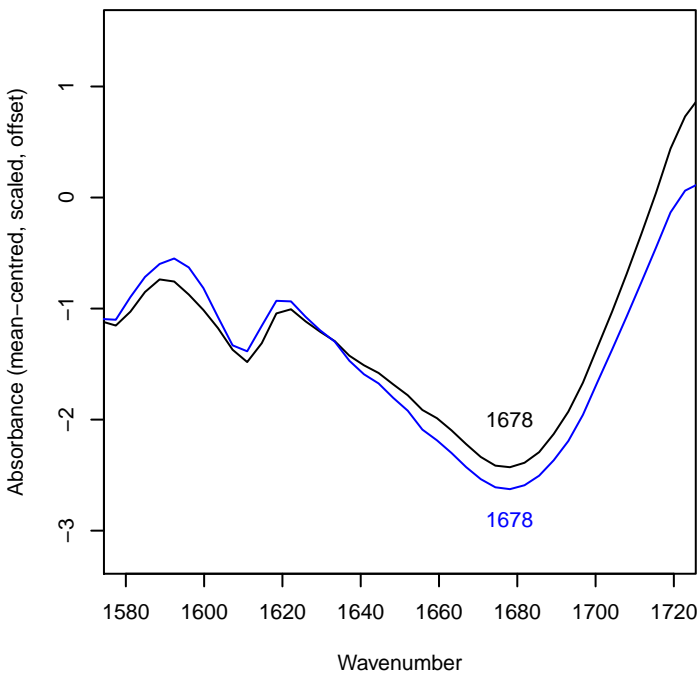

TPA/PA, as-rec vs co-cryo-milled, zero weeks

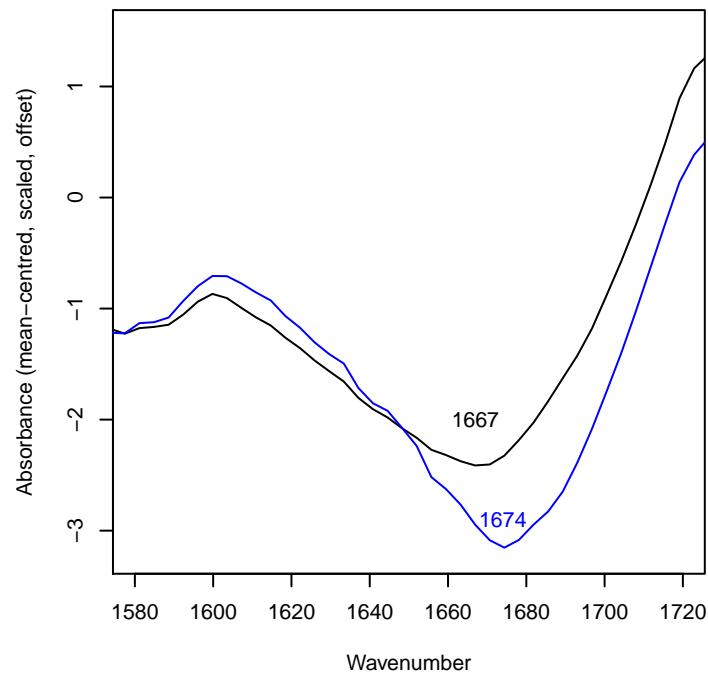

IPA/PA, as-rec vs co-cryo-milled, zero weeks

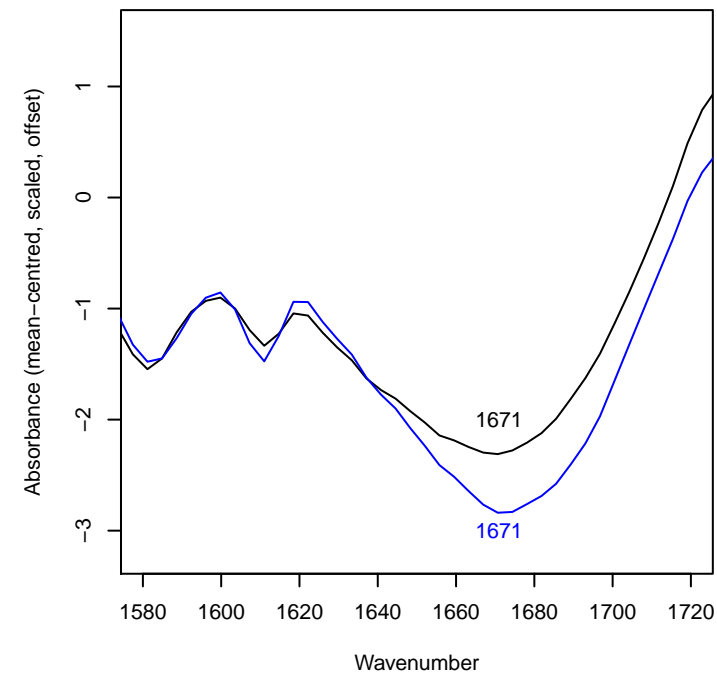

Supplement: s1 [file s1]
