# Supplementary material for: Investigation of Potential Amorphisation and Co-Amorphisation Behaviour of the Benzene Di-Carboxylic Acids upon Cryo-Milling
Source: MDPI journal article supplement (doi:10.3390/molecules24213990), 2019-11-05

phthalic and terephthalic acid CM together for 60mins (after phthalic and terephthalic acid CM for 60mins (at zero wavenumber))

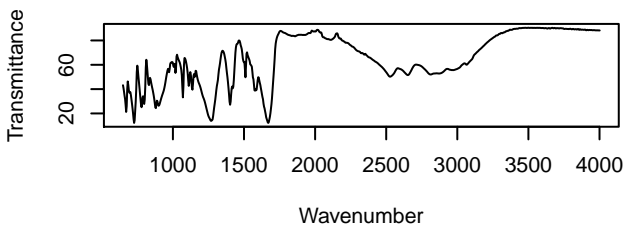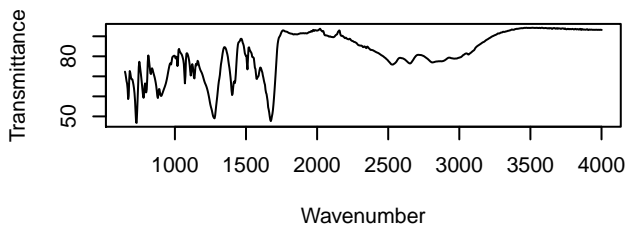

phthalic and terephthalic acid CM separately for 60mins (after phthalic and terephthalic acid CM separately for 60mins (at zero wavenumber))

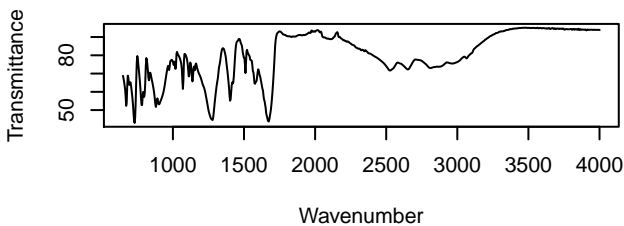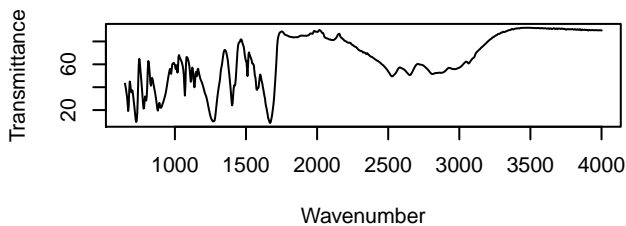

**Terephthalic acid CM for 60mins**

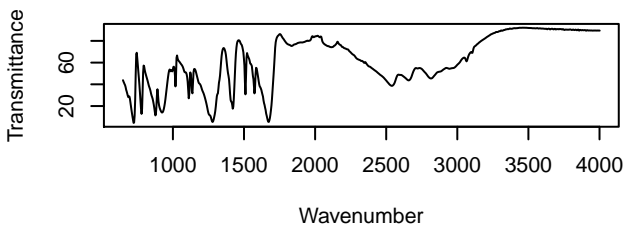

**Phthalic acid CM for 60mins**

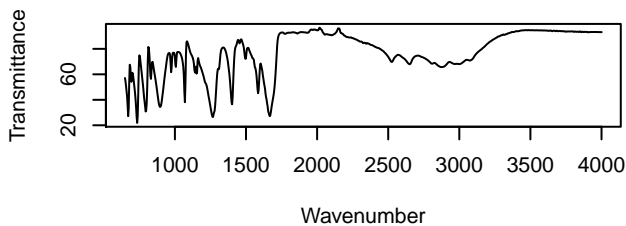

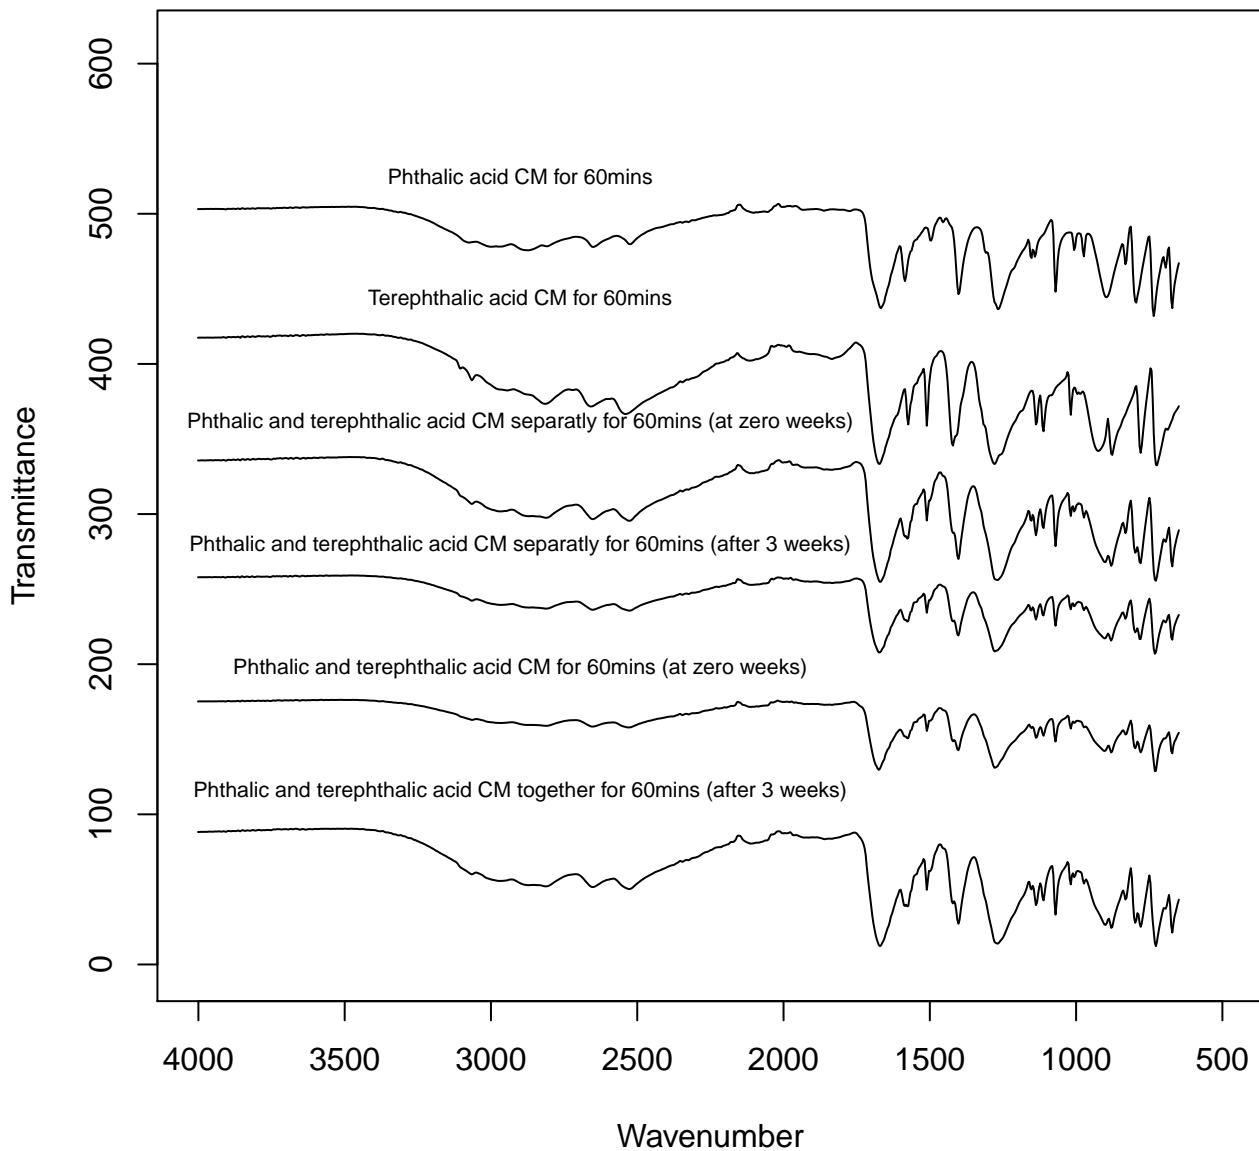

Supplement: s1 [file s1]
