# Supplementary material for: Investigation of Potential Amorphisation and Co-Amorphisation Behaviour of the Benzene Di-Carboxylic Acids upon Cryo-Milling
Source: MDPI journal article supplement (doi:10.3390/molecules24213990), 2019-11-05

lic and isophthalic acid CM together for 60mins (afterlic and isophthalic acid CM together for 60mins (at ze

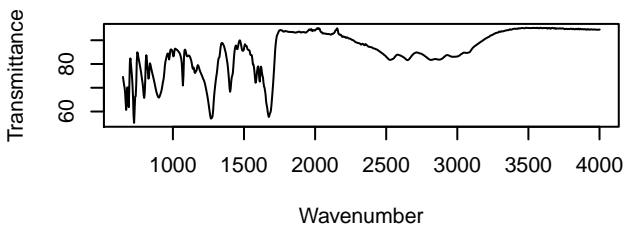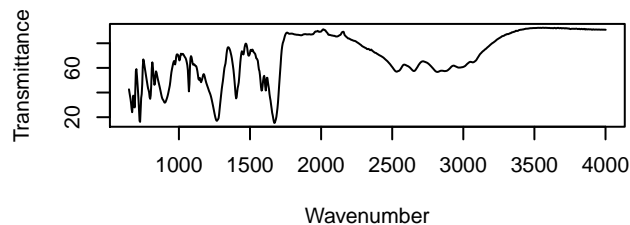

lic and isophthalic acid CM separatly for 60mins (afterlic and isophthalic acid CM separatly for 60mins (at ze

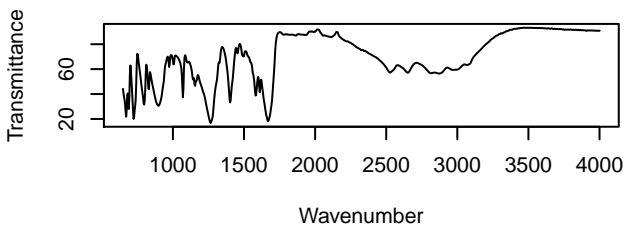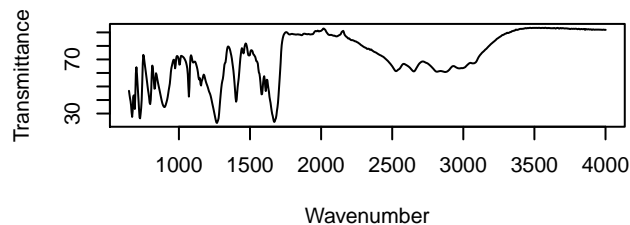

**Isophthalic acid CM for 60mins**

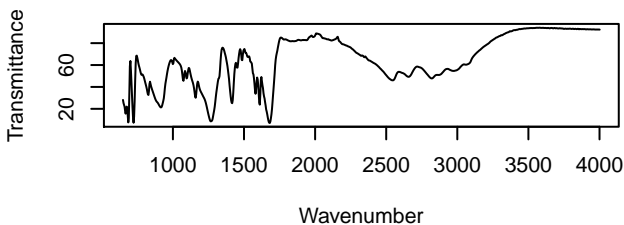

**Phthaic acid CM for 60mins**

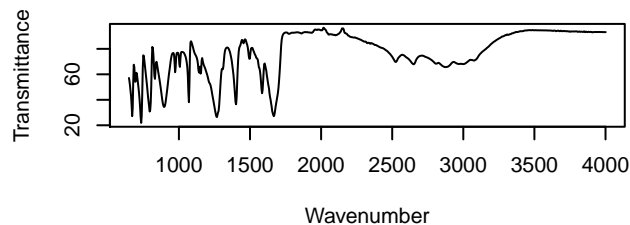

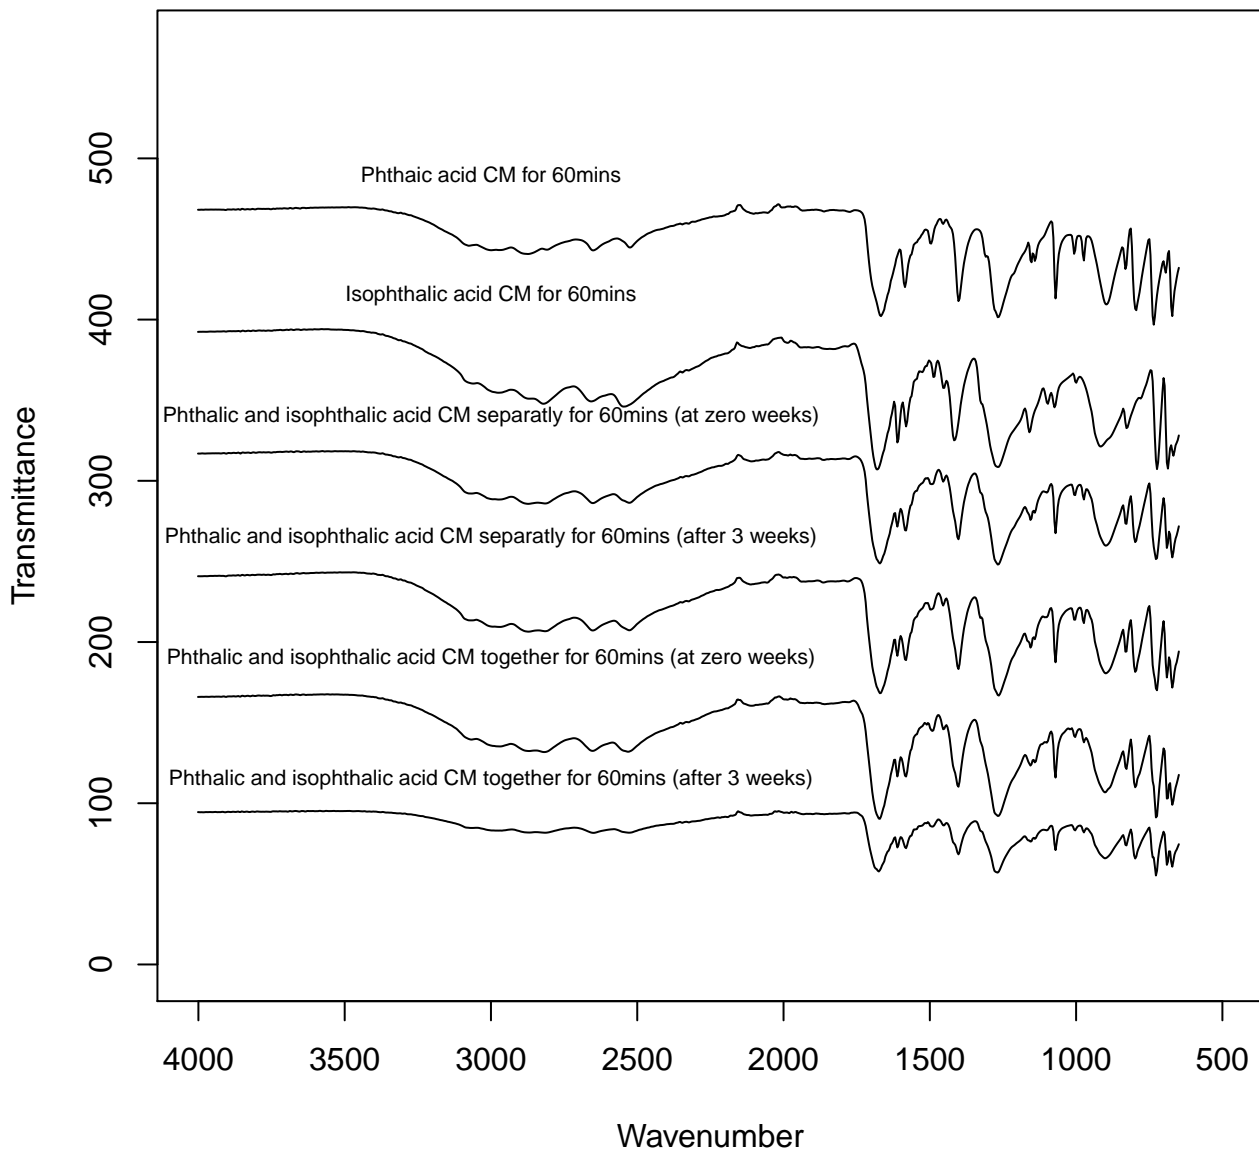

Supplement: s1 [file s1]
