# Supplementary material for: Investigation of Potential Amorphisation and Co-Amorphisation Behaviour of the Benzene Di-Carboxylic Acids upon Cryo-Milling
Source: MDPI journal article supplement (doi:10.3390/molecules24213990), 2019-11-05

**Terephthalic acid**

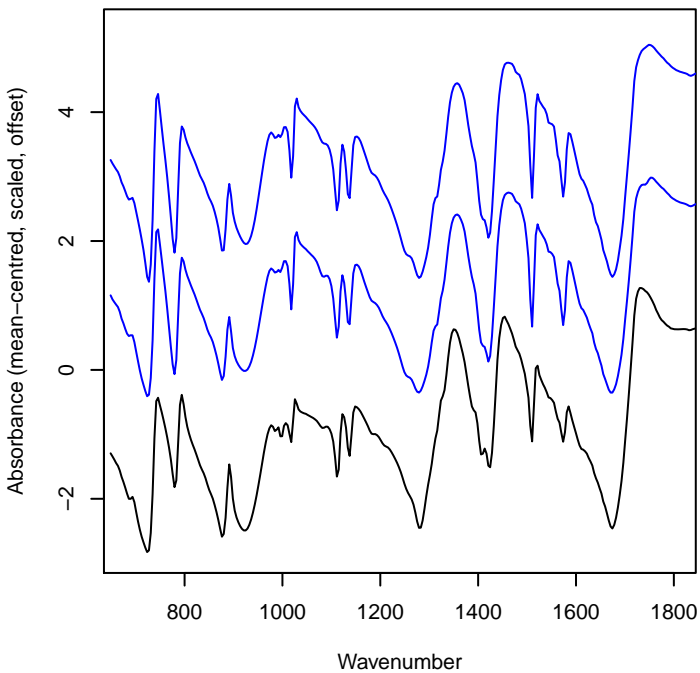

**Isophthalic acid**

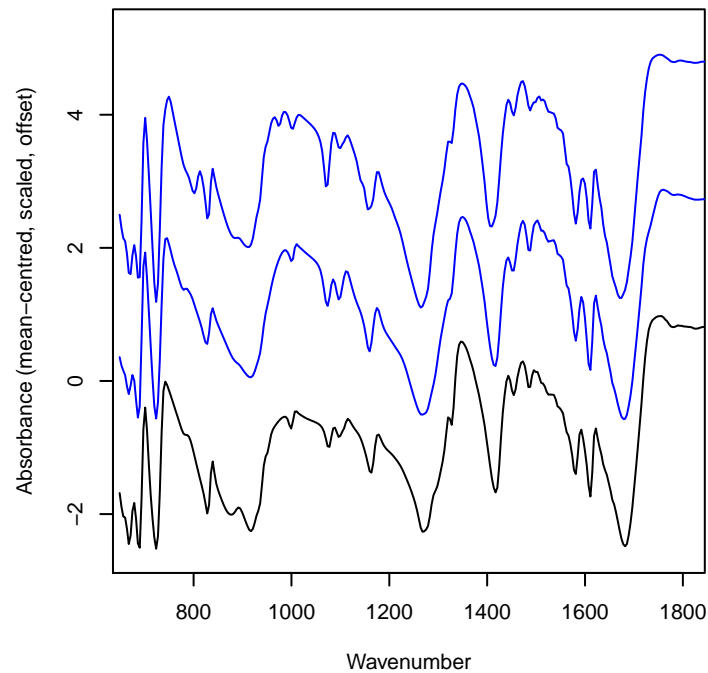

**Phthalic acid**

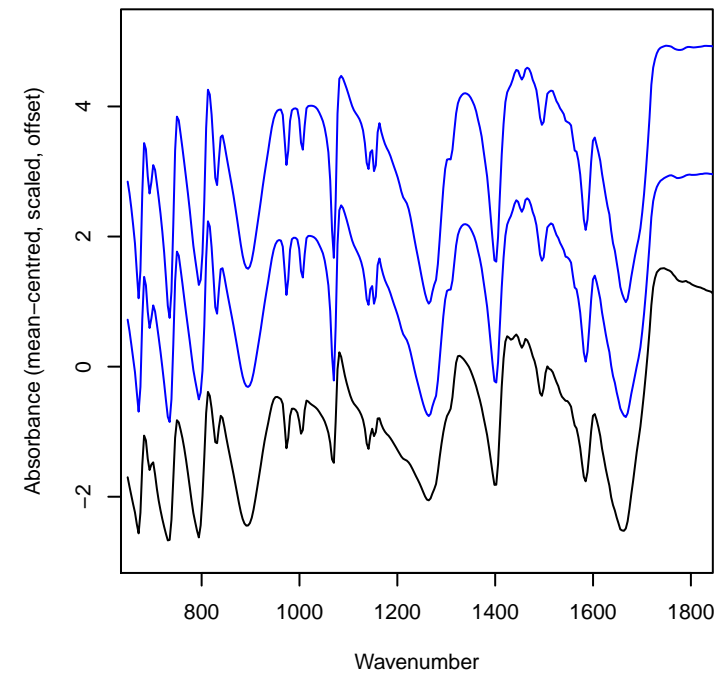

**Terephthalic acid**

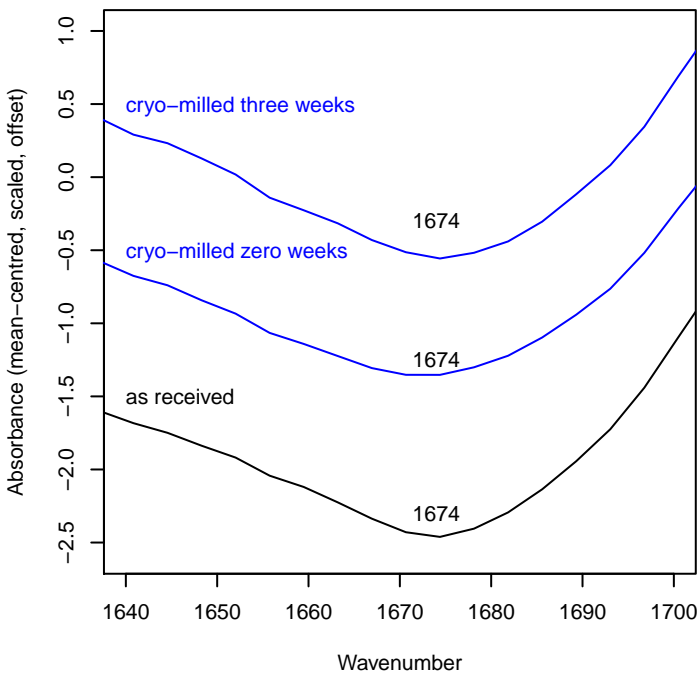

**Isophthalic acid**

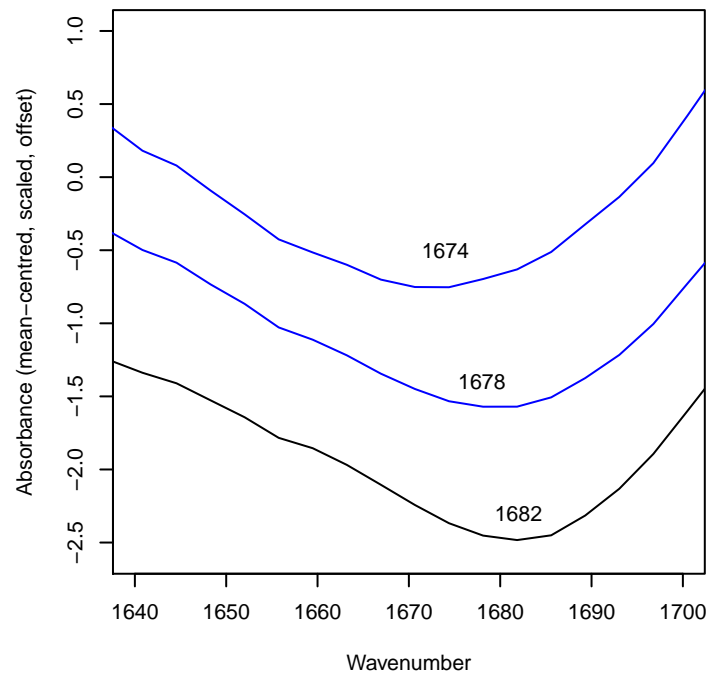

**Phthalic acid**

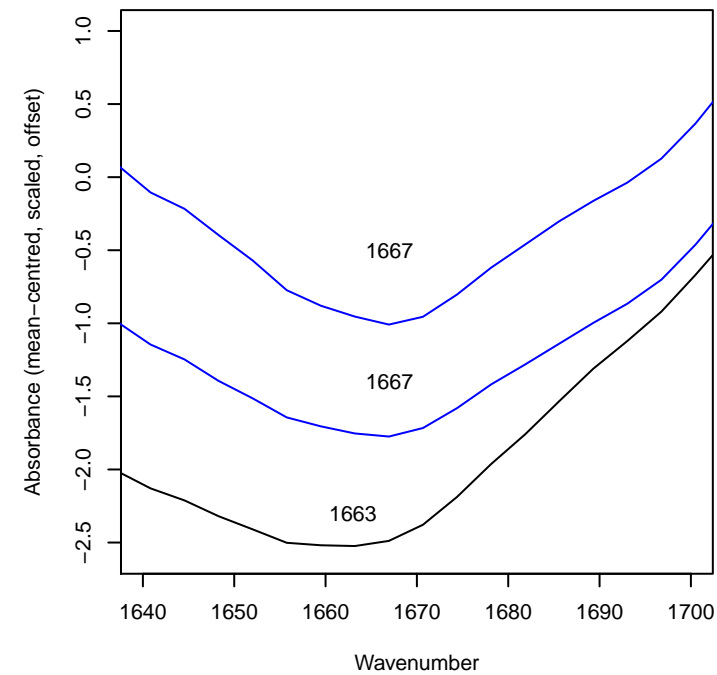

Supplement: s1 [file s1]
