# Supplementary material for: Investigation of Potential Amorphisation and Co-Amorphisation Behaviour of the Benzene Di-Carboxylic Acids upon Cryo-Milling
Source: MDPI journal article supplement (doi:10.3390/molecules24213990), 2019-11-05

phthalic and terephthalic acid CM together for 60mins (3) phthalic and terephthalic acid CM together for 60mins (zero)

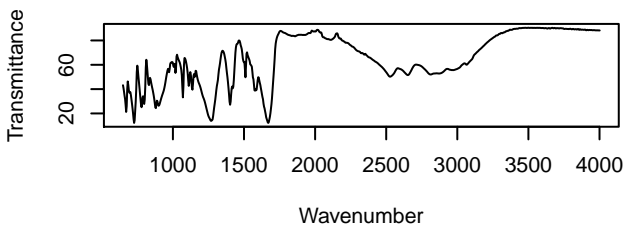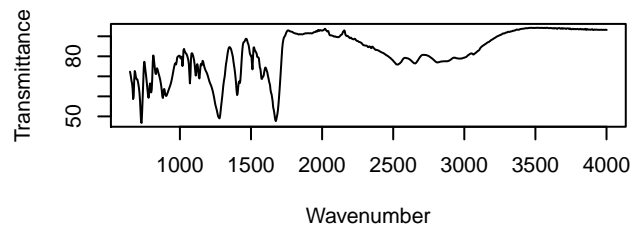

phthalic and terephthalic acid CM separately for 60mins (3) phthalic and terephthalic acid CM separately for 60mins (zero)

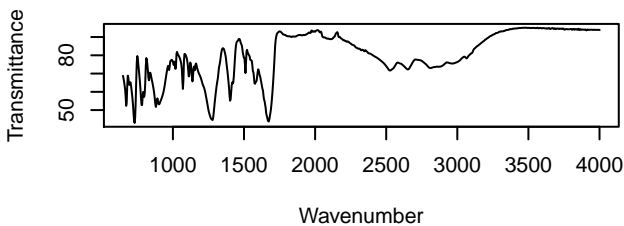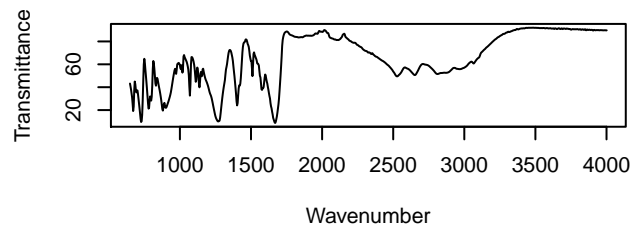

**Terephthalic acid CM 60mins**

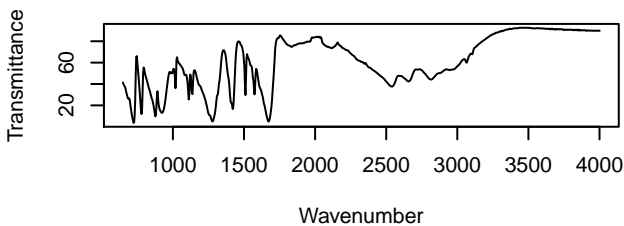

**Phthalic acid CM 60mins**

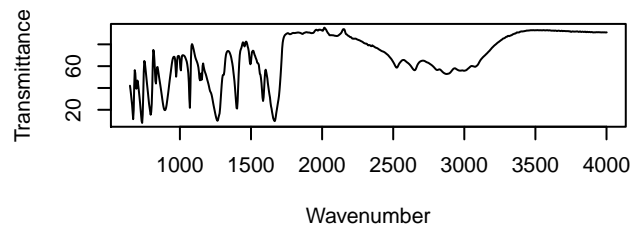

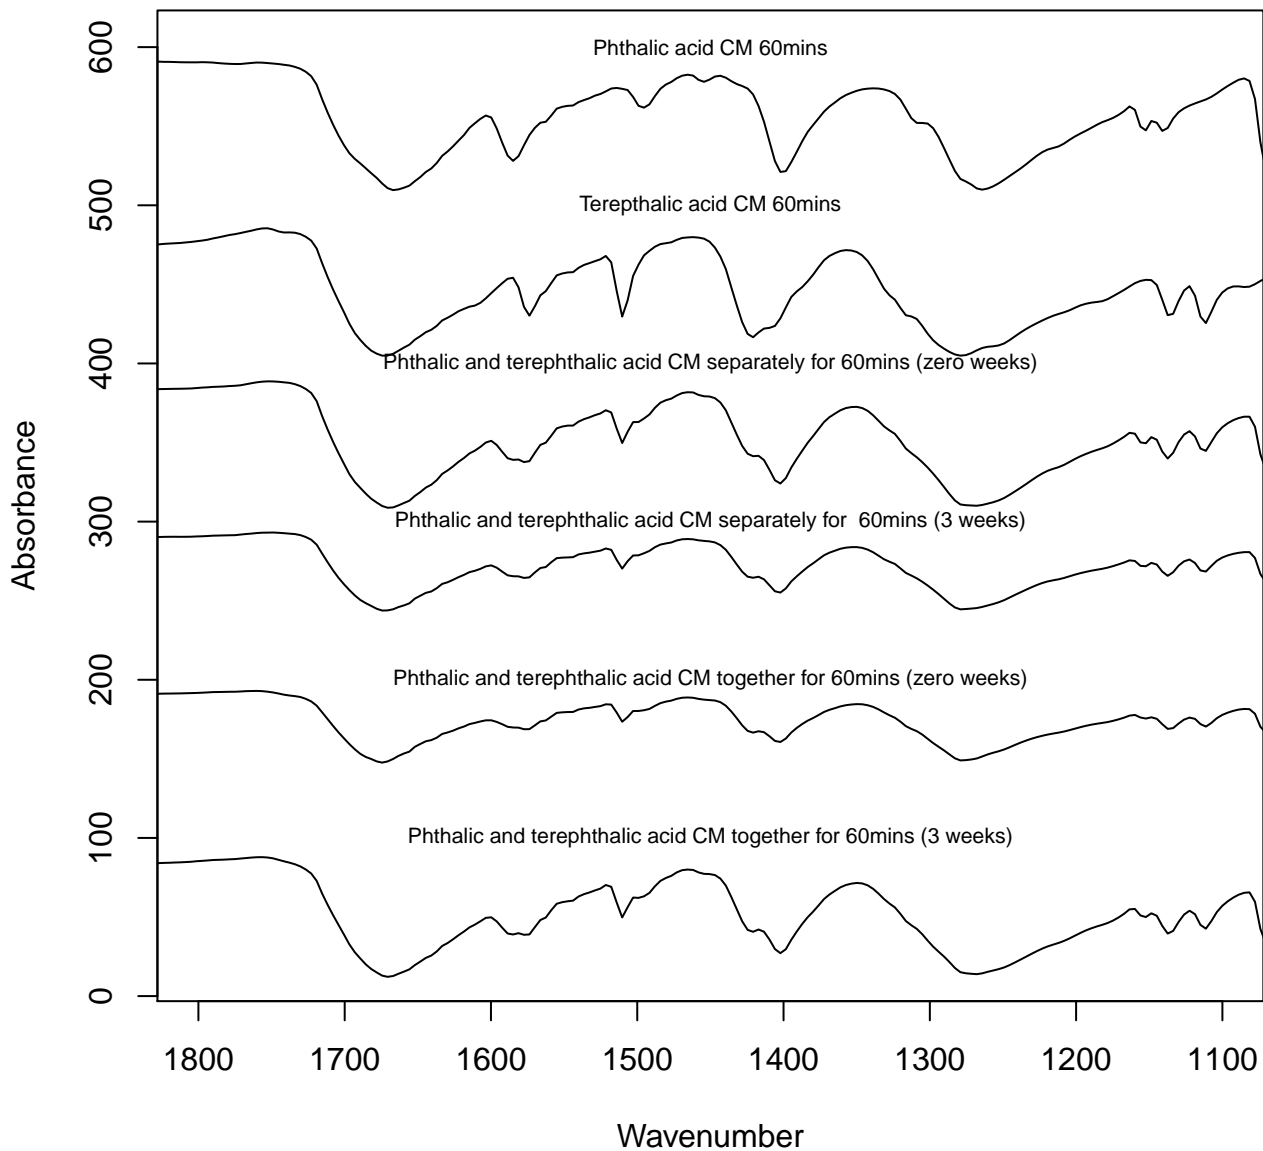

Supplement: s1 [file s1]
