# Supplementary material for: Investigation of Potential Amorphisation and Co-Amorphisation Behaviour of the Benzene Di-Carboxylic Acids upon Cryo-Milling
Source: MDPI journal article supplement (doi:10.3390/molecules24213990), 2019-11-05

**Terephthalic acid CM for 60mins at week 3**

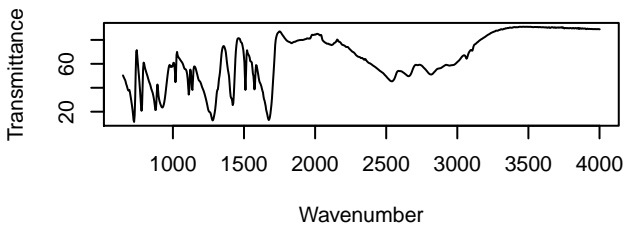

**Terephthalic acid CM for 60mins at zero weeks**

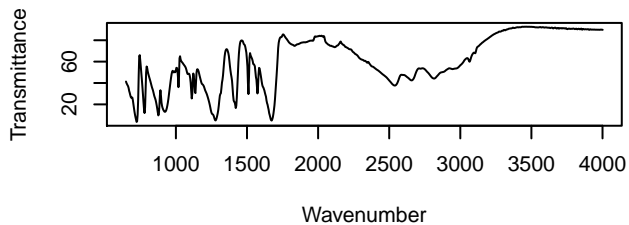

**Terephthalic acid as received**

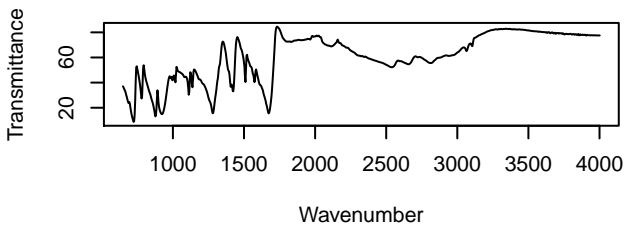

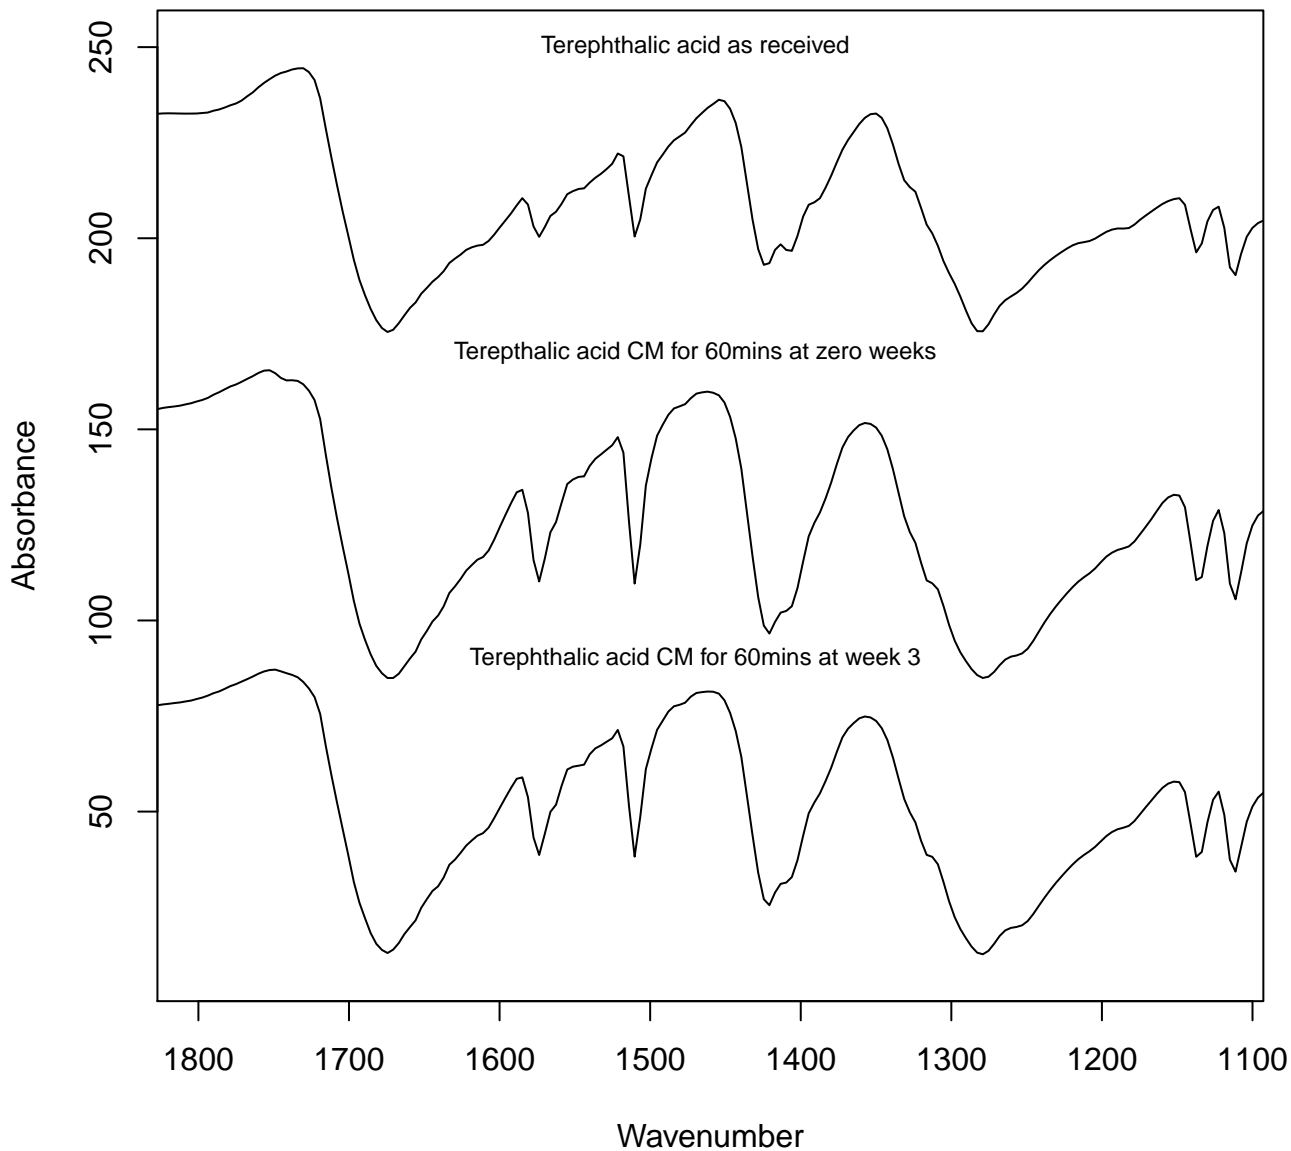

Supplement: s1 [file s1]
