# Supplementary material for: Investigation of Potential Amorphisation and Co-Amorphisation Behaviour of the Benzene Di-Carboxylic Acids upon Cryo-Milling
Source: MDPI journal article supplement (doi:10.3390/molecules24213990), 2019-11-05

Phthalic and isophthalic acid CM together for 60mins (3 alic and isophthalic acid CM together for 60mins (zero

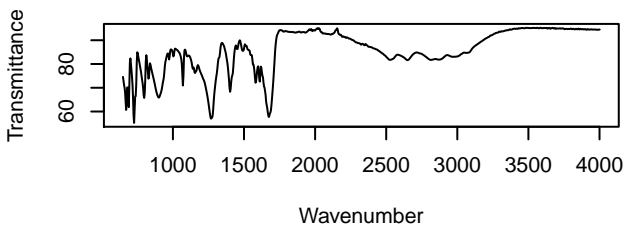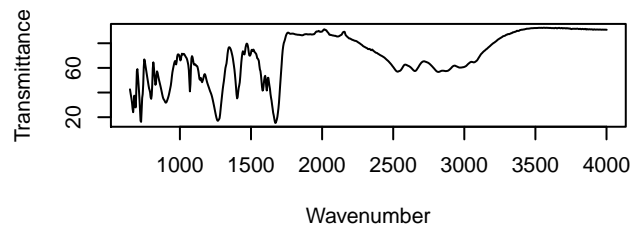

Phthalic and isophthalic acid CM separately for 60mins (3 alic and isophthalic acid CM separately for 60mins (zero

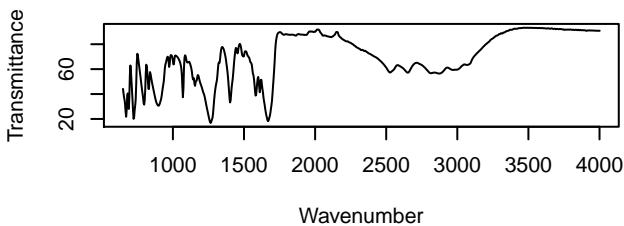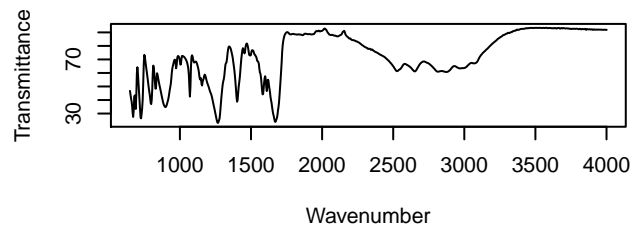

**Phthalic acid CM 60mins**

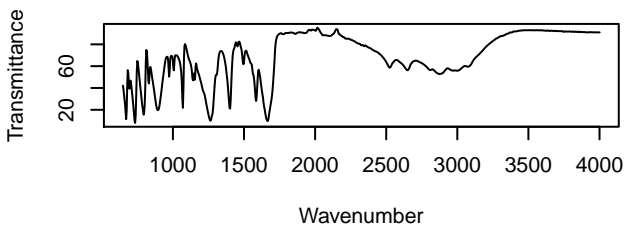

**Isophthalic acid CM 60mins**

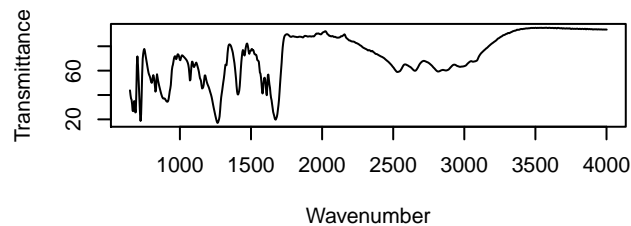

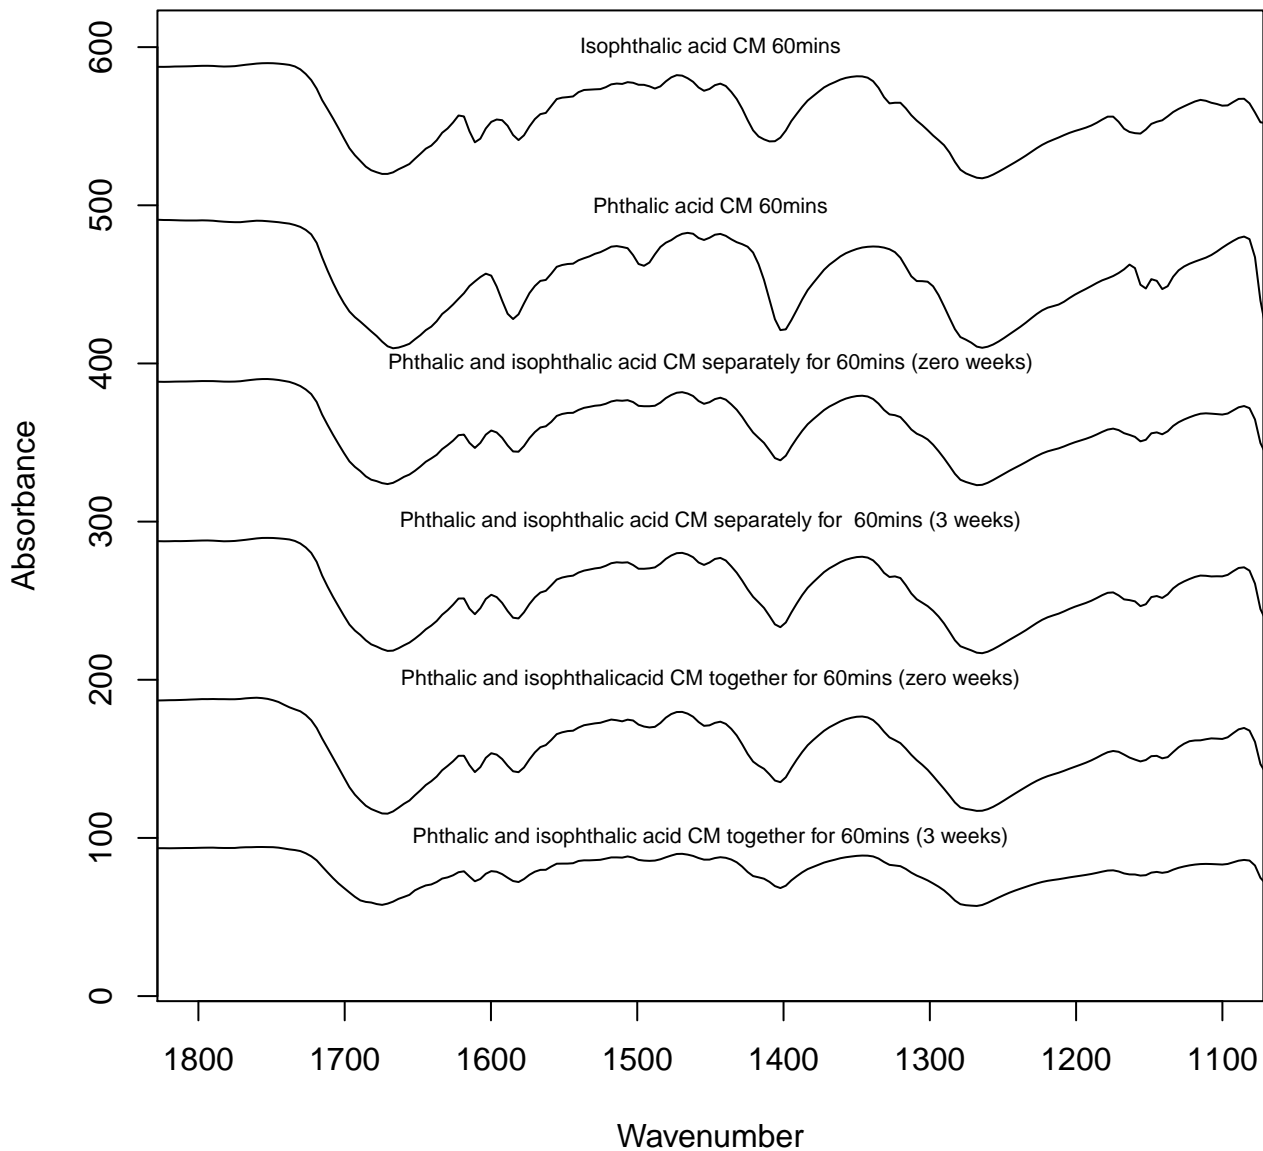

Supplement: s1 [file s1]
