# Supplementary material for: Investigation of Potential Amorphisation and Co-Amorphisation Behaviour of the Benzene Di-Carboxylic Acids upon Cryo-Milling
Source: MDPI journal article supplement (doi:10.3390/molecules24213990), 2019-11-05

thalic and terephthalic acid CM together for 60mins (halicand terephthalic acid CM togrther for 60mins (ze

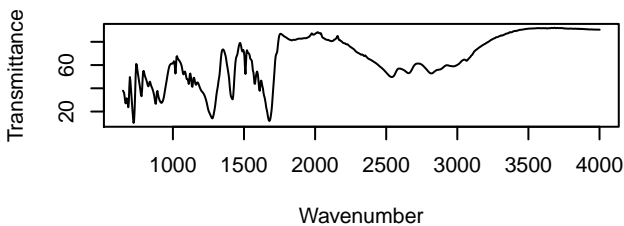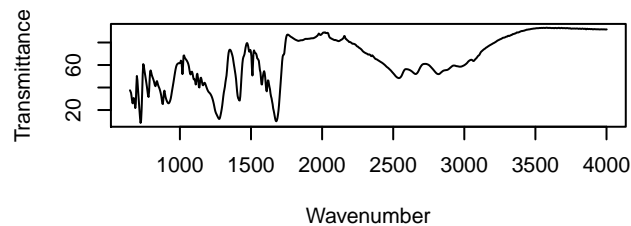

thalic and terephthalic acid CM separately for 60mins alic and terephthalic acid CM separately for 60mins (ze

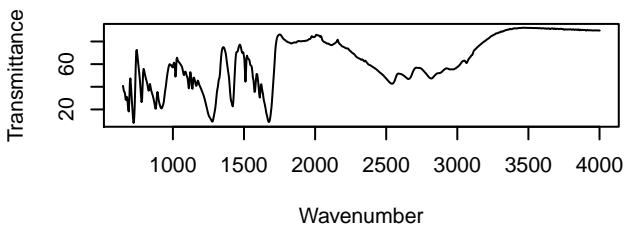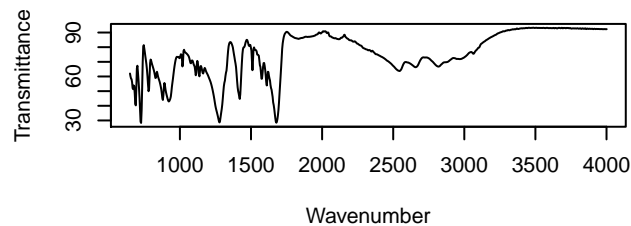

**Terephthalic cid CM 60mins**

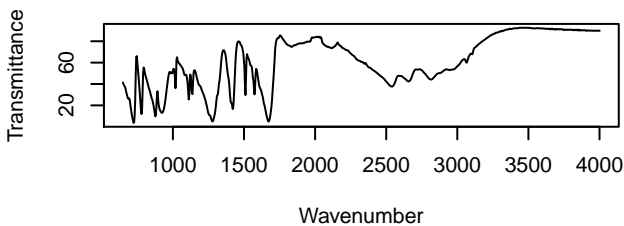

**Isophthalic acid CM 60mins**

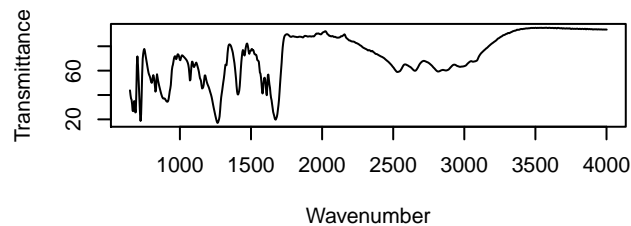

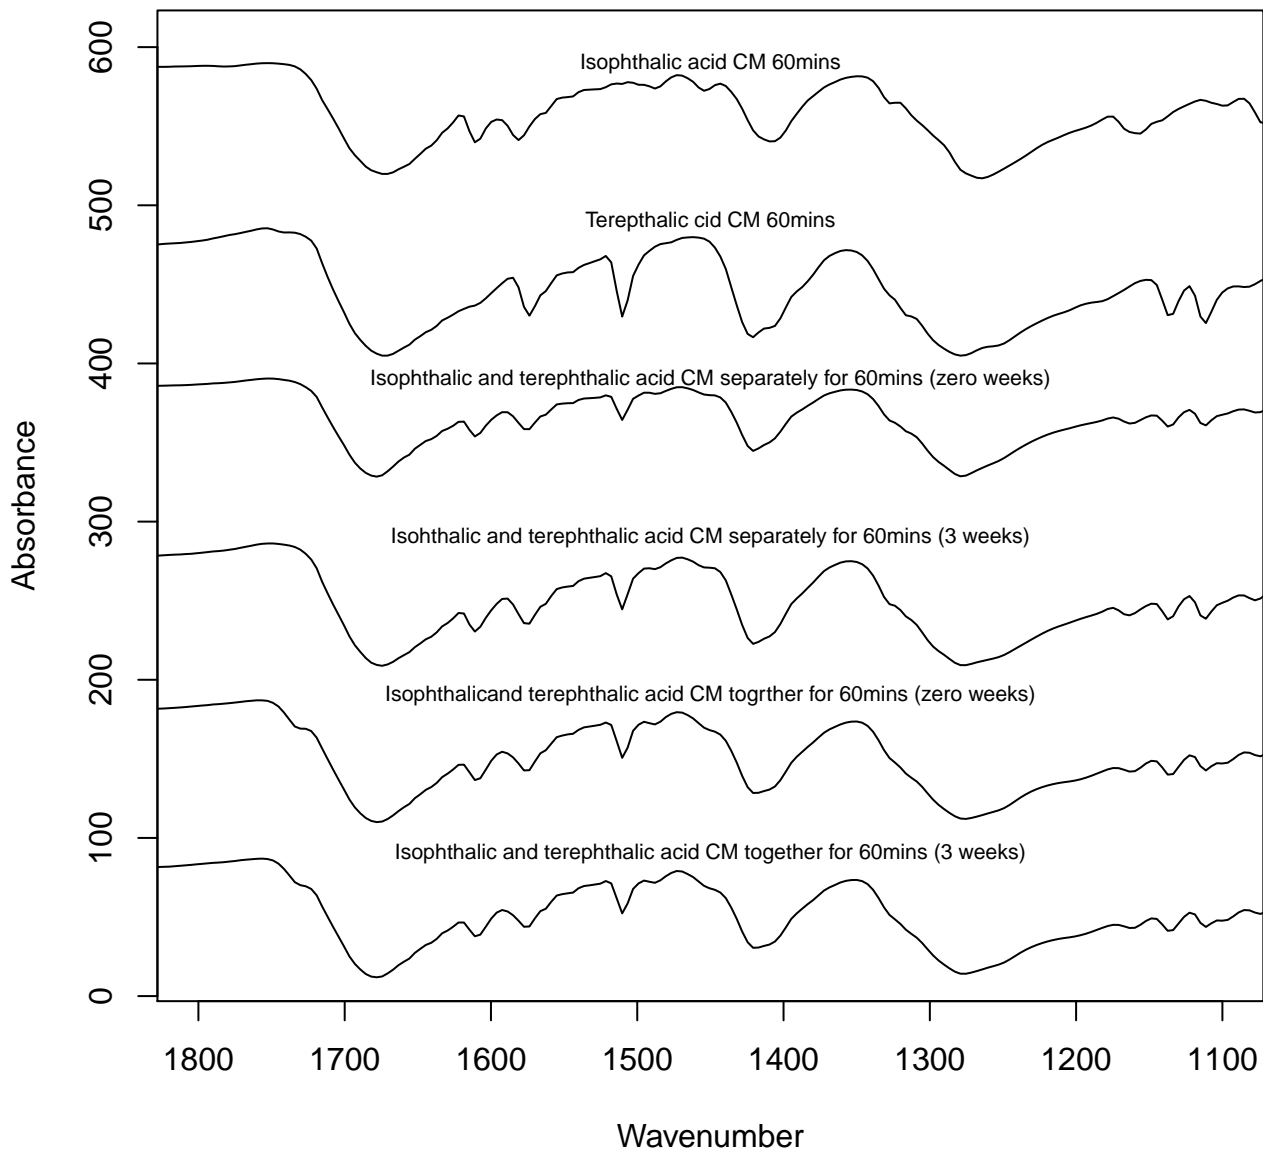

Supplement: s1 [file s1]
