# Supplementary material for: Investigation of Potential Amorphisation and Co-Amorphisation Behaviour of the Benzene Di-Carboxylic Acids upon Cryo-Milling
Source: MDPI journal article supplement (doi:10.3390/molecules24213990), 2019-11-05

**afalic and terephthalic acid CM together for 60mins (afalic and terephthalic acid CM together for 60mins (at**

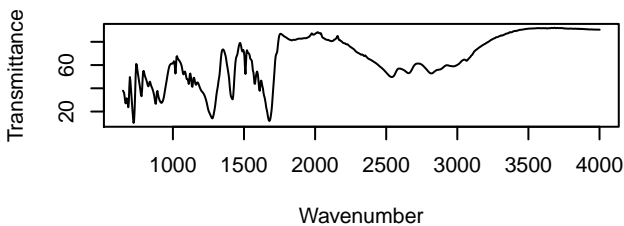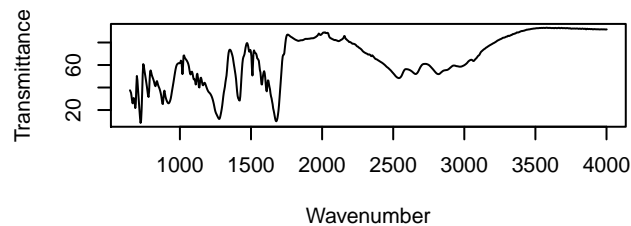

**afalic and terephthalic acid CM separatly for 60mins (afalic and terephthalic acid CM separatly for 60mis (at**

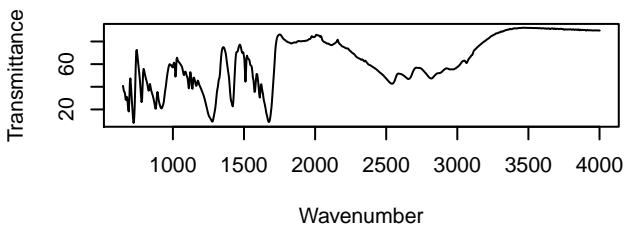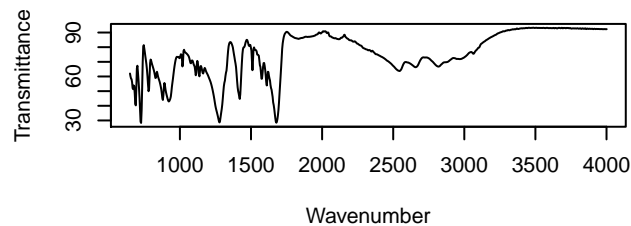

**Terephthalic acid CM for 60mins**

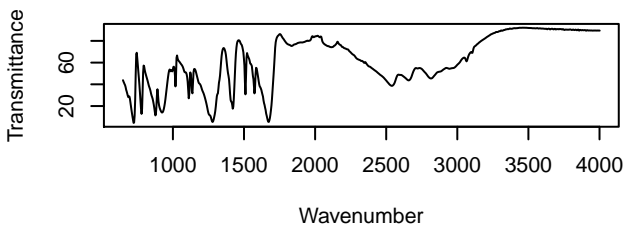

**Isophthalic acid CM for 60mins**

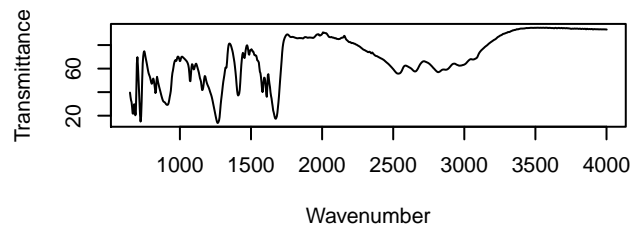

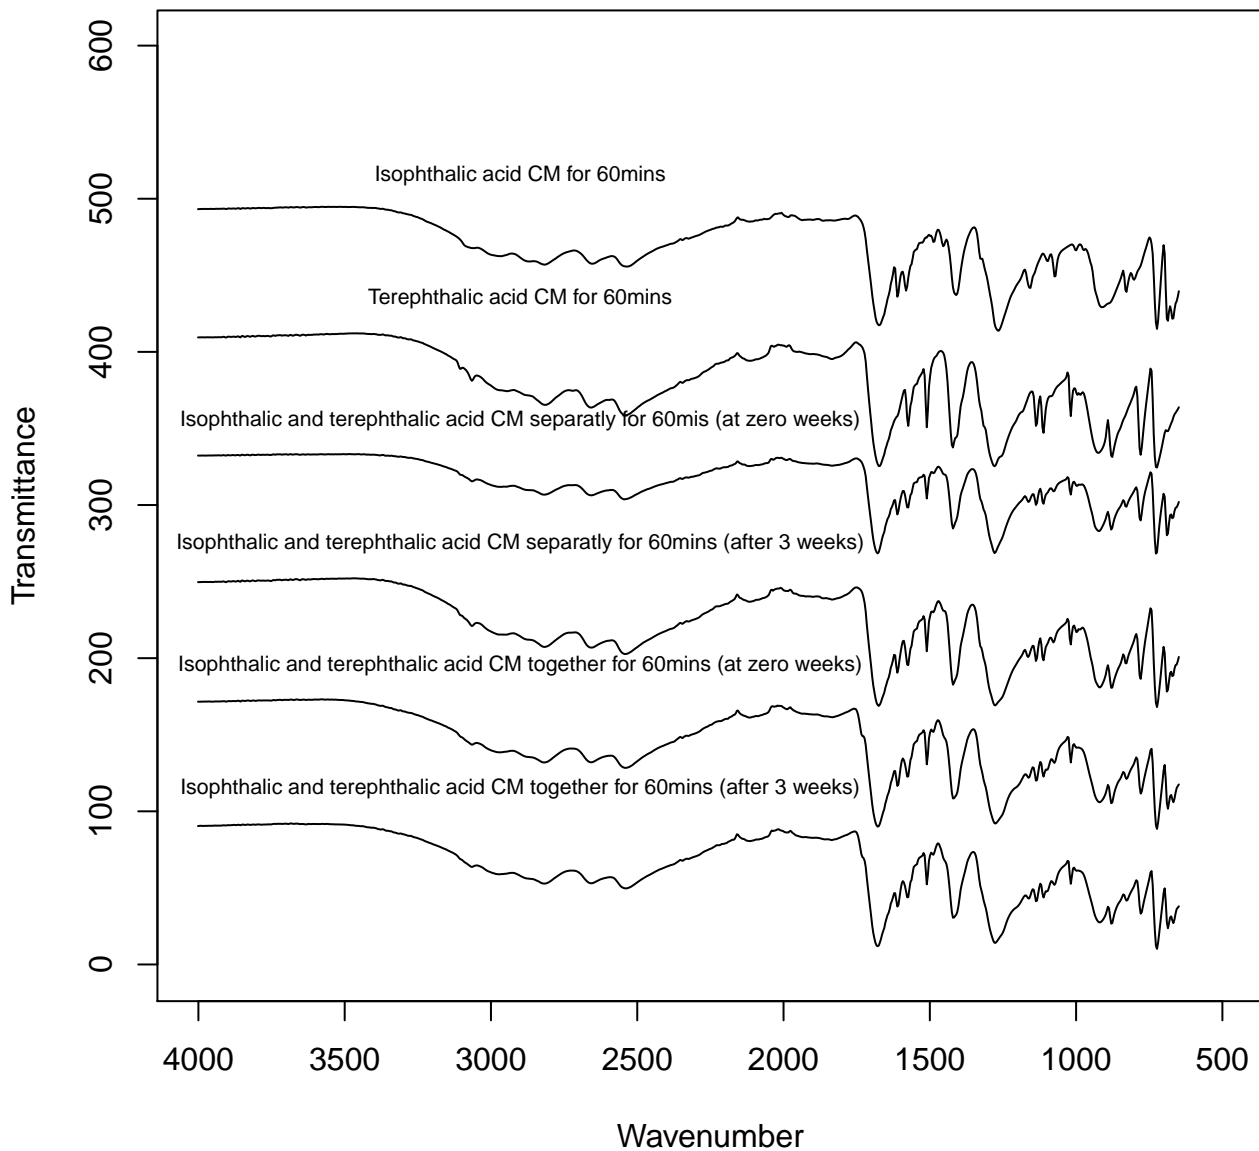

Supplement: s1 [file s1]
