# Supplementary figures and images for: Investigation of Potential Amorphisation and Co-Amorphisation Behaviour of the Benzene Di-Carboxylic Acids upon Cryo-Milling
Source: MDPI journal article supplement (doi:10.3390/molecules24213990), 2019-11-05

**a) Terephthalic and isophthalic**

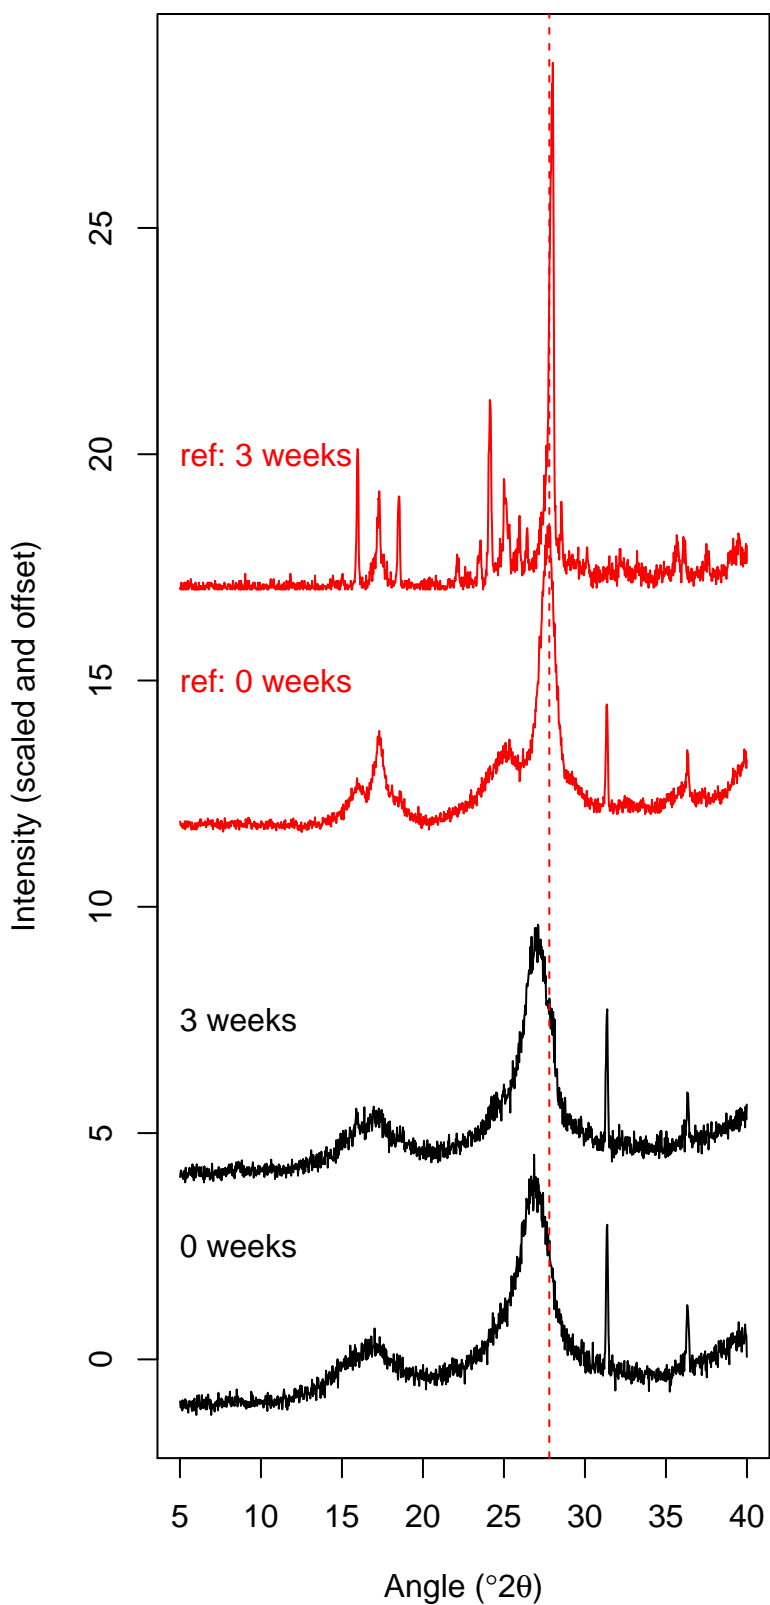

**b) Terephthalic and phthalic**

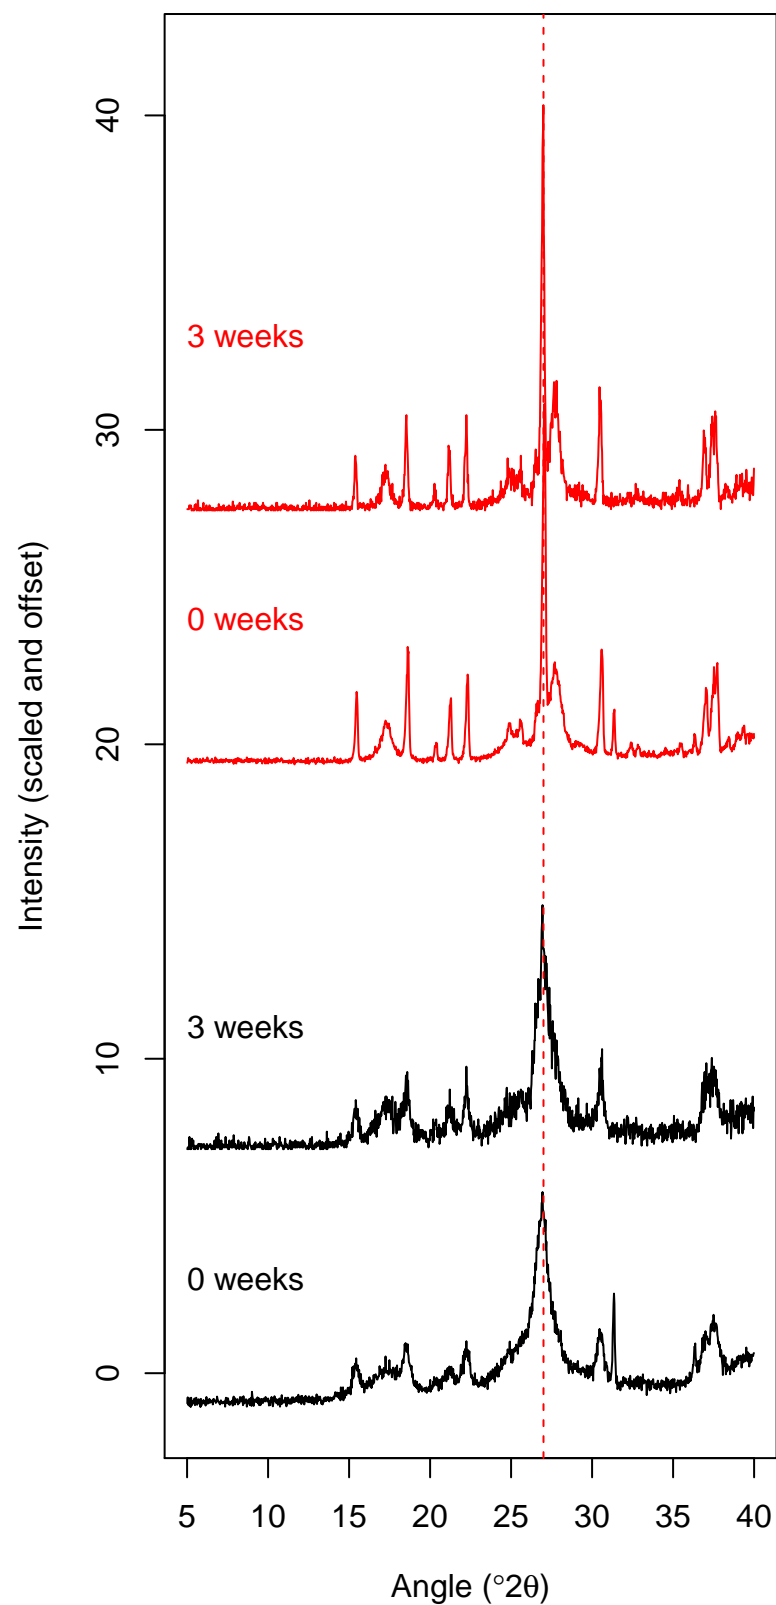

**c) Isophthalic and phthalic**

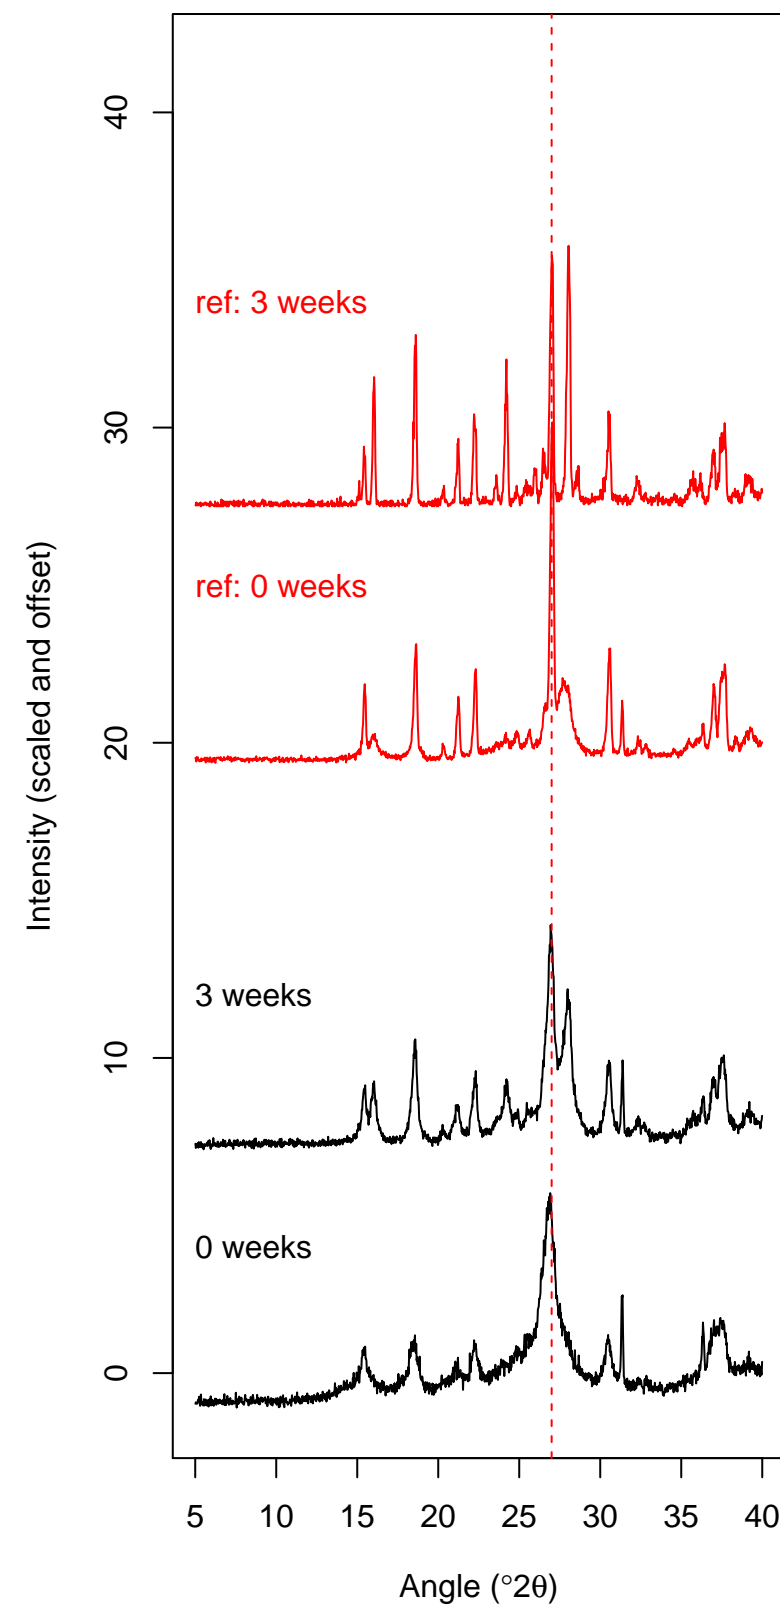

Supplement: s1 [file s1]

**a) Terephthalic acid**

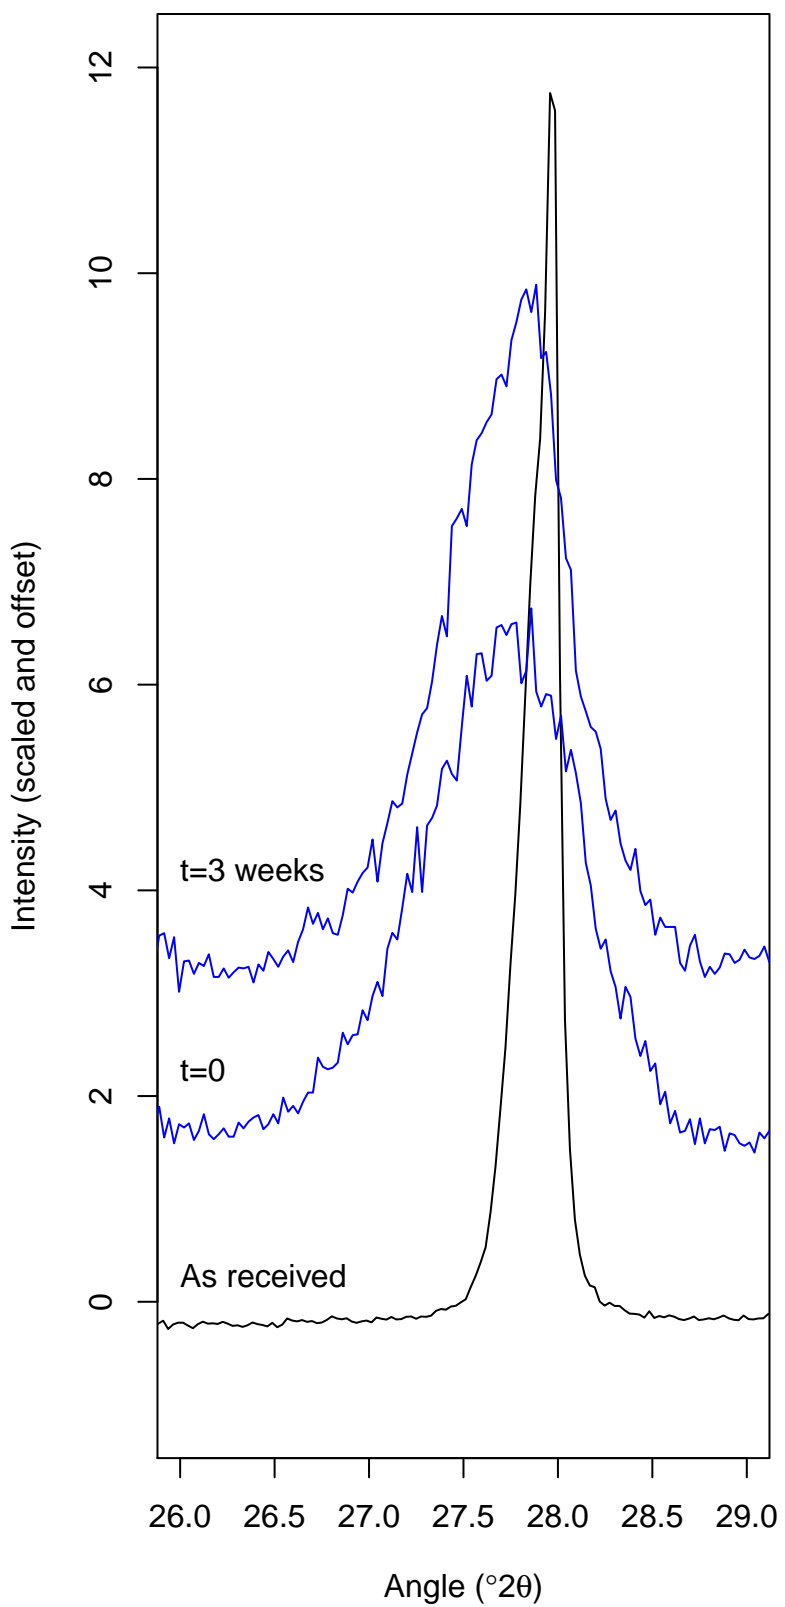

**b) Isophthalic acid**

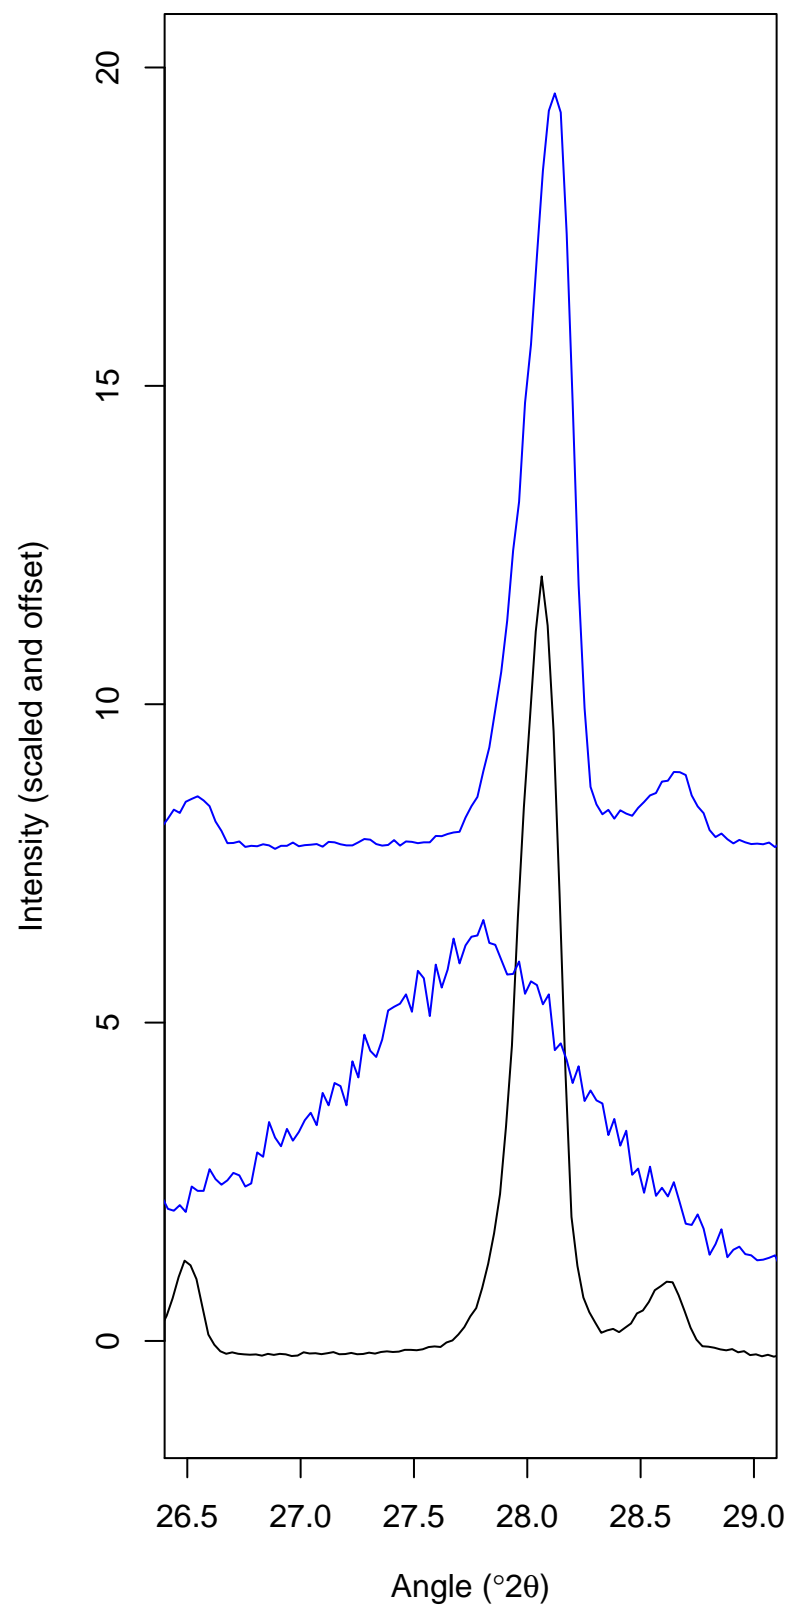

**c) Phthalic acid**

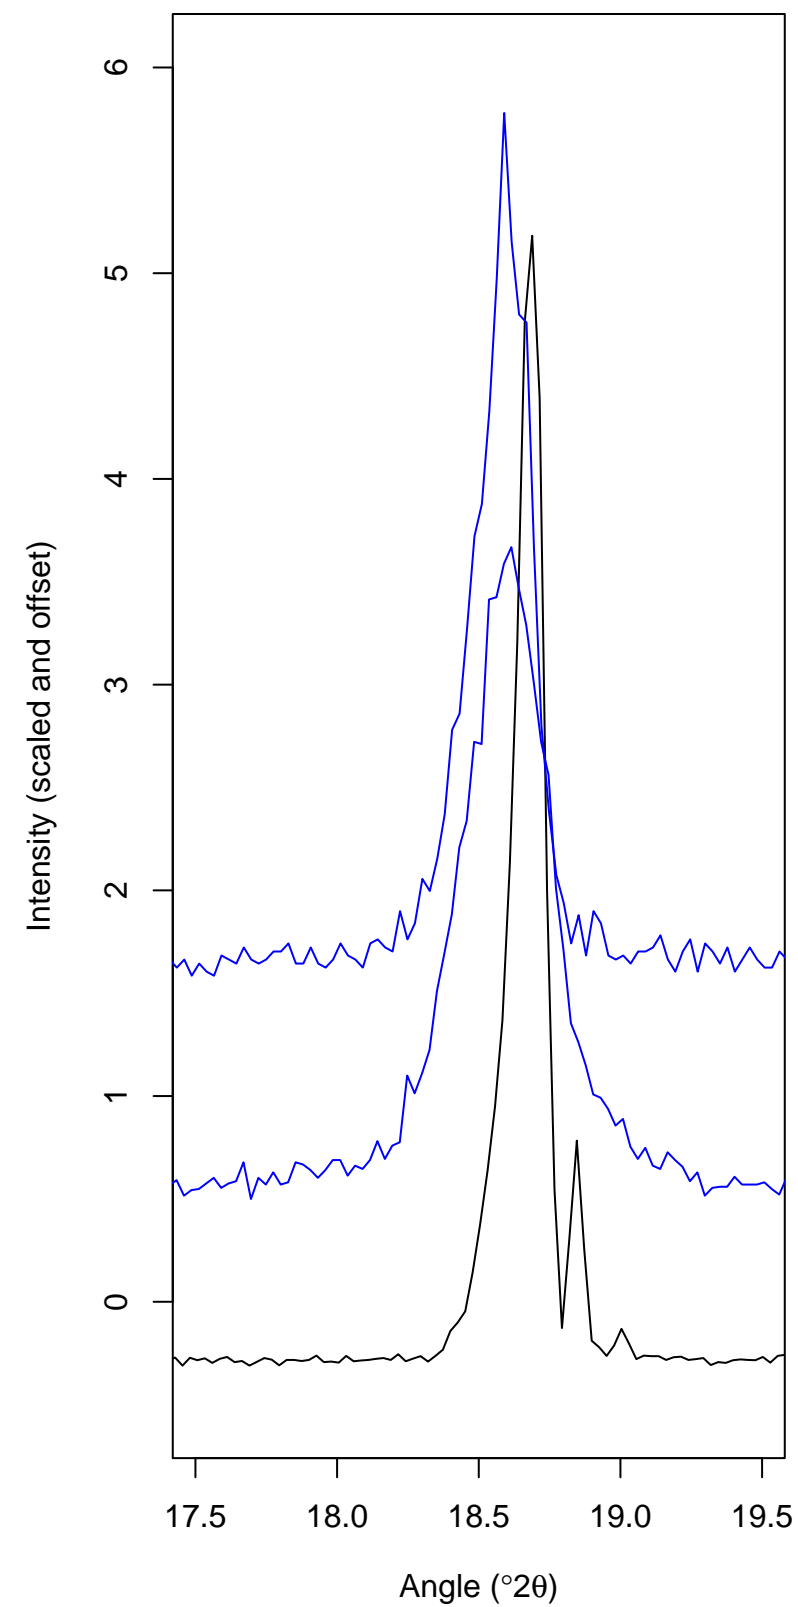

Supplement: s1 [file s1]

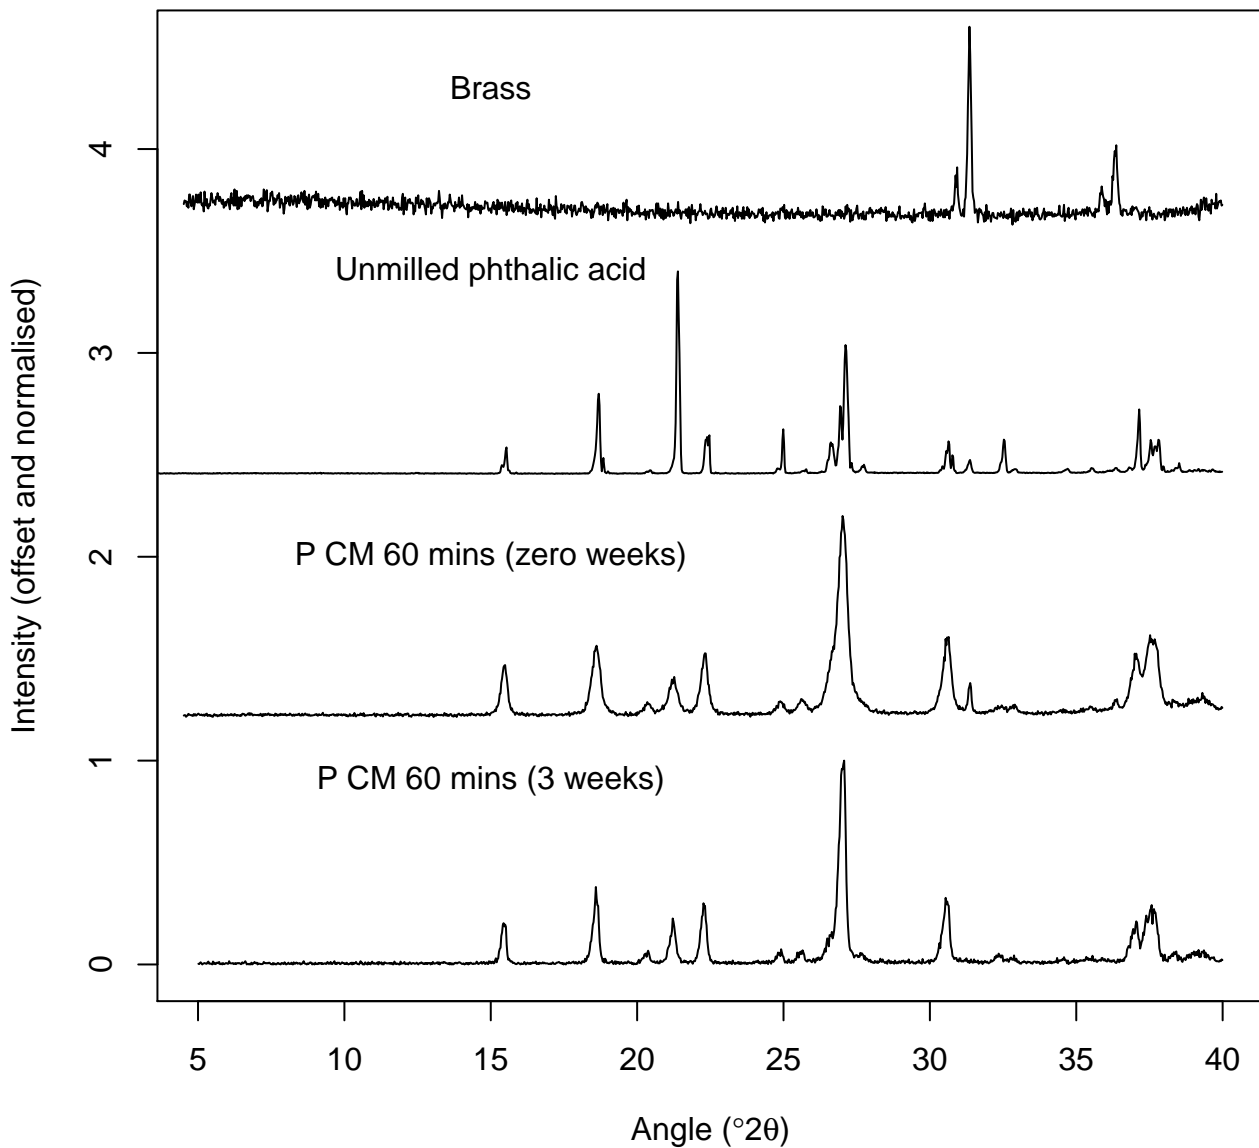

Supplement: s1 [file s1]

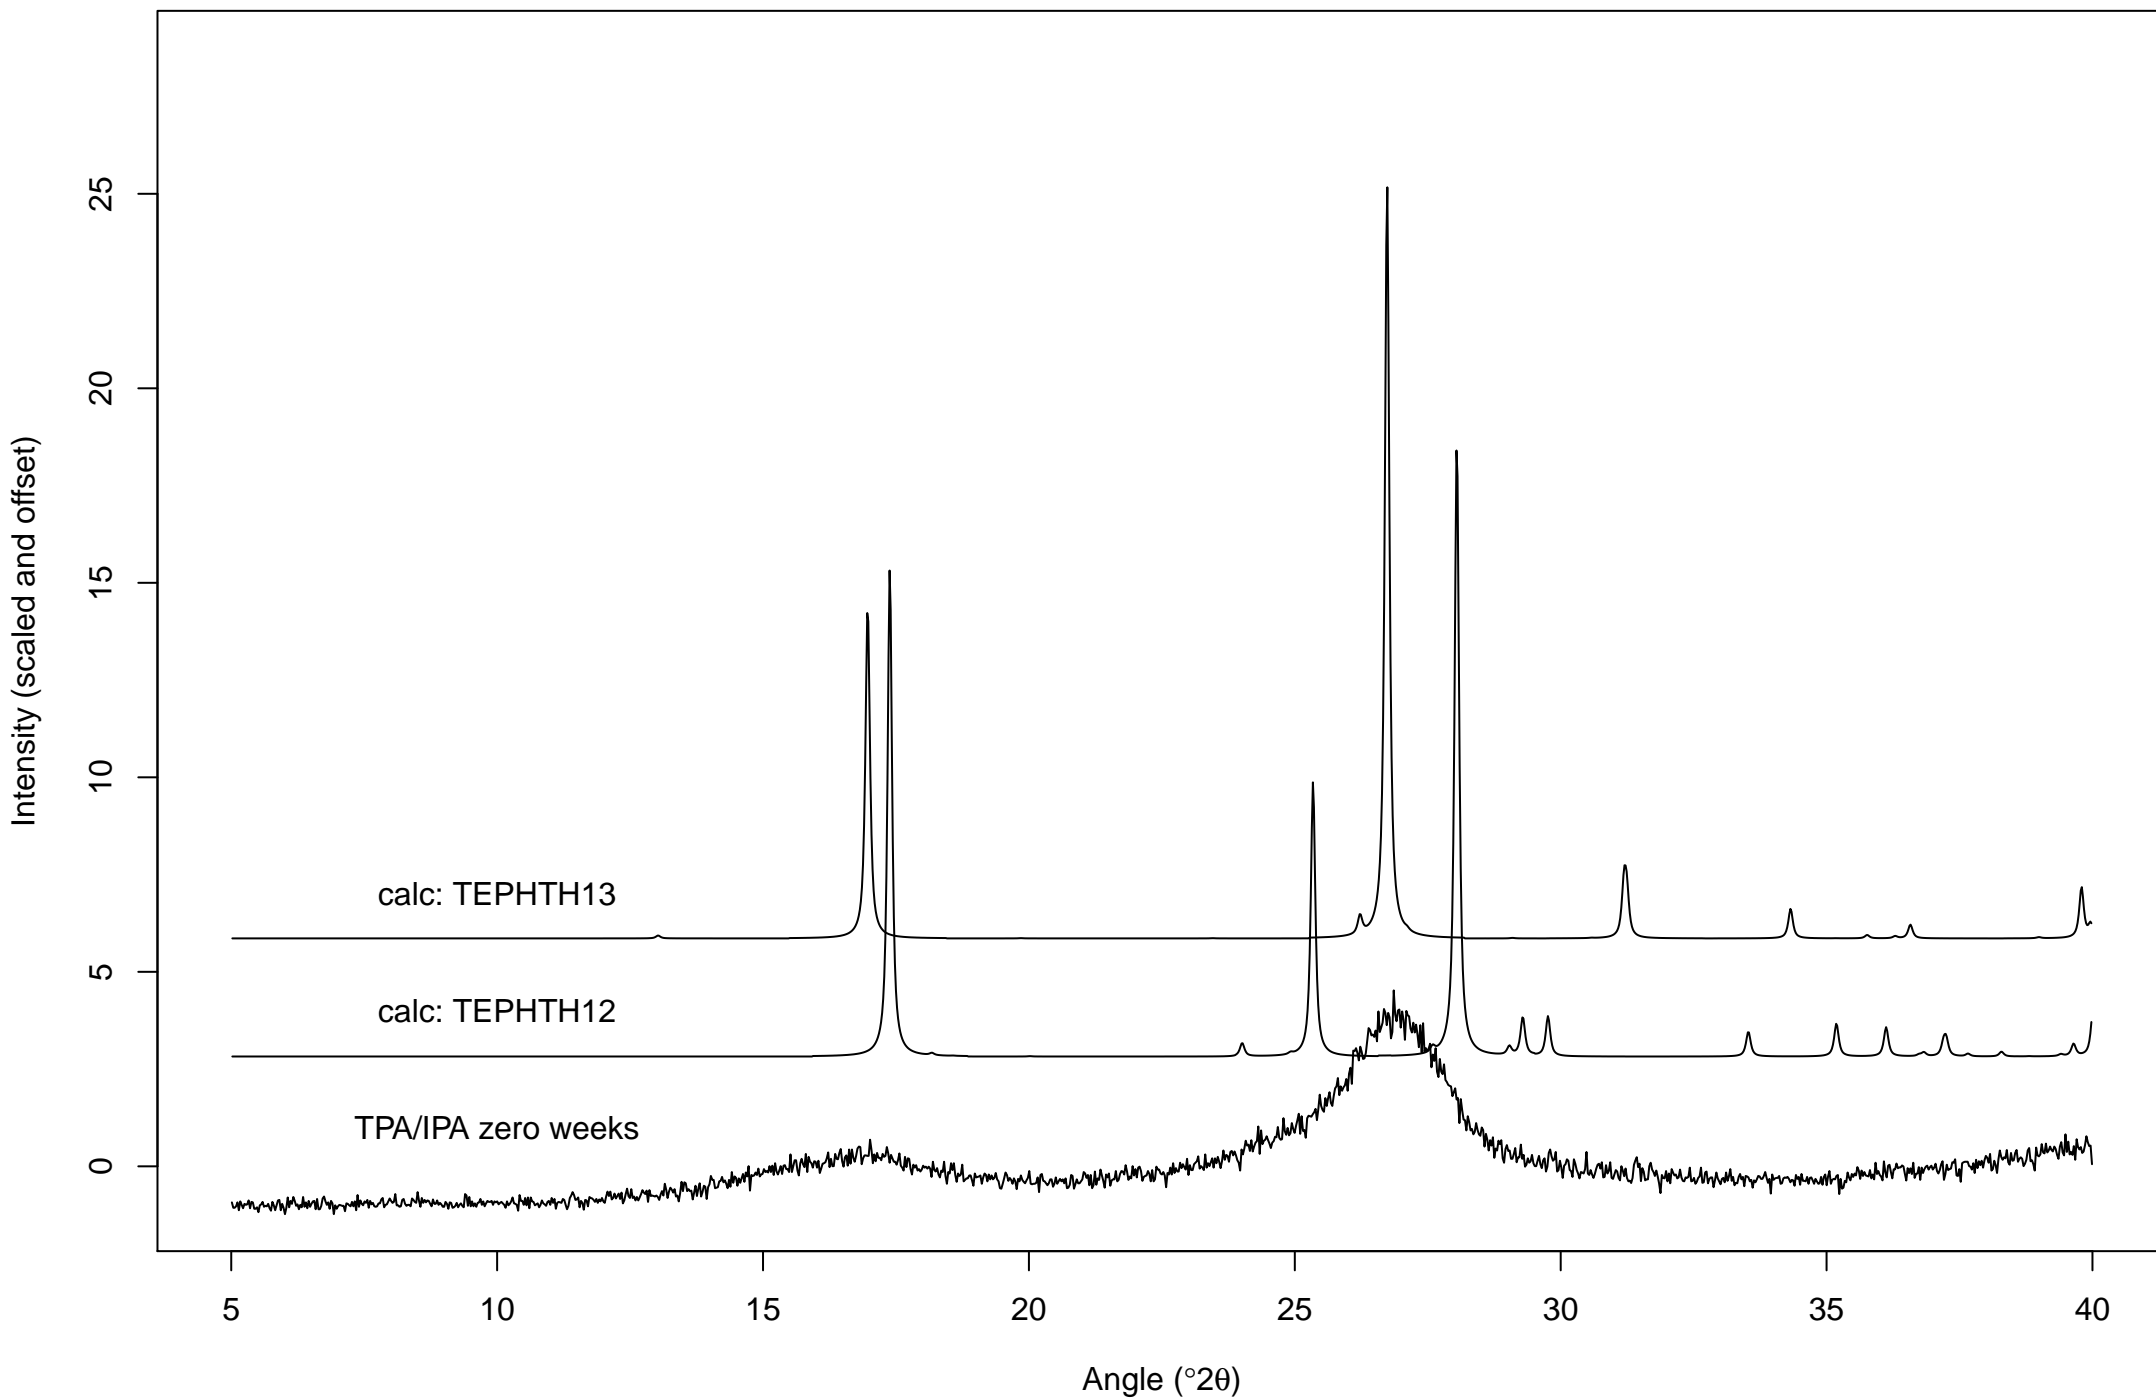

Supplement: s1 [file s1]

**a) Terephthalic acid**

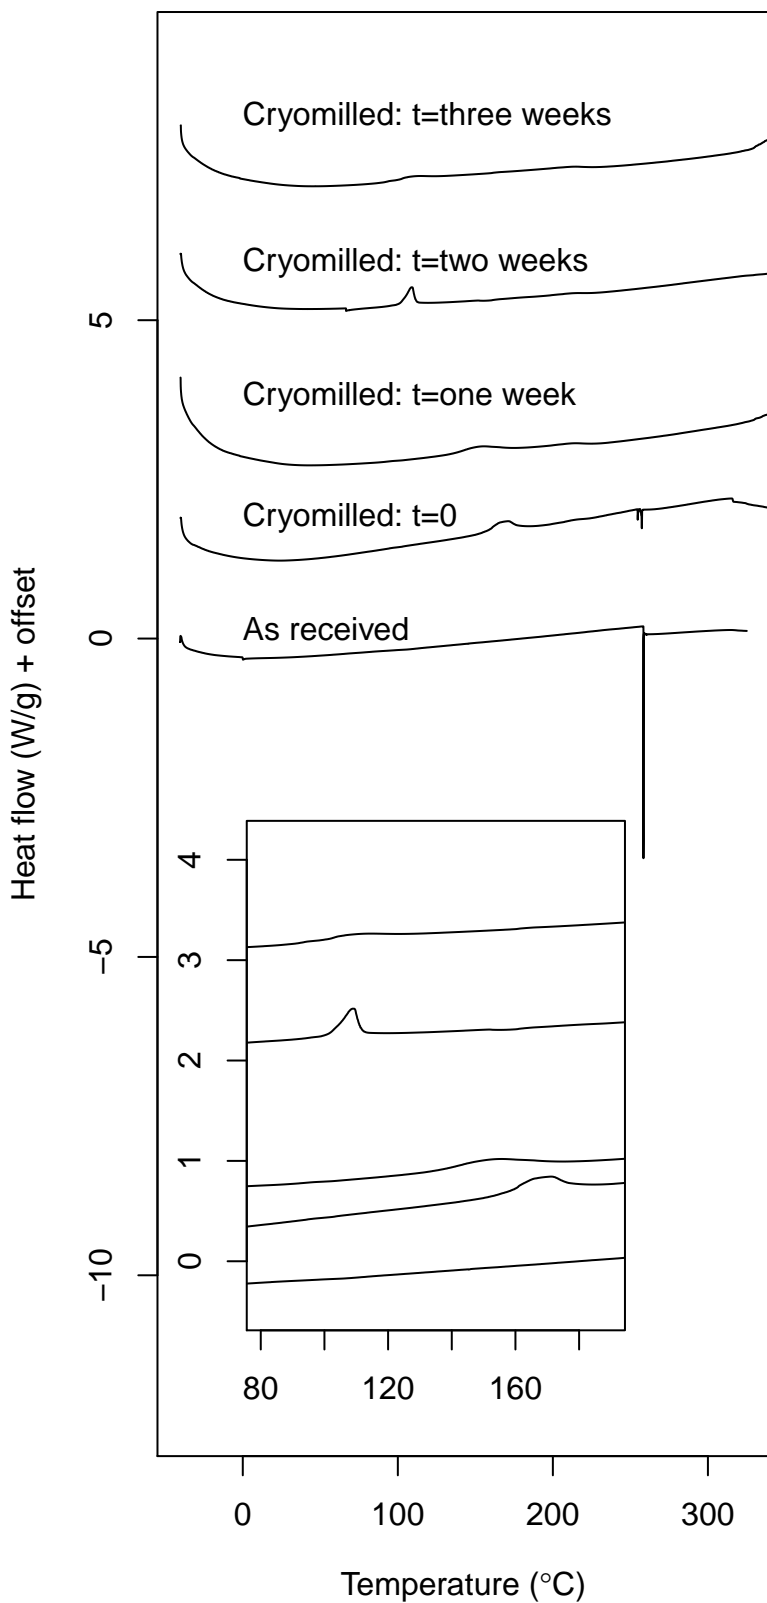

**b) Isophthalic acid**

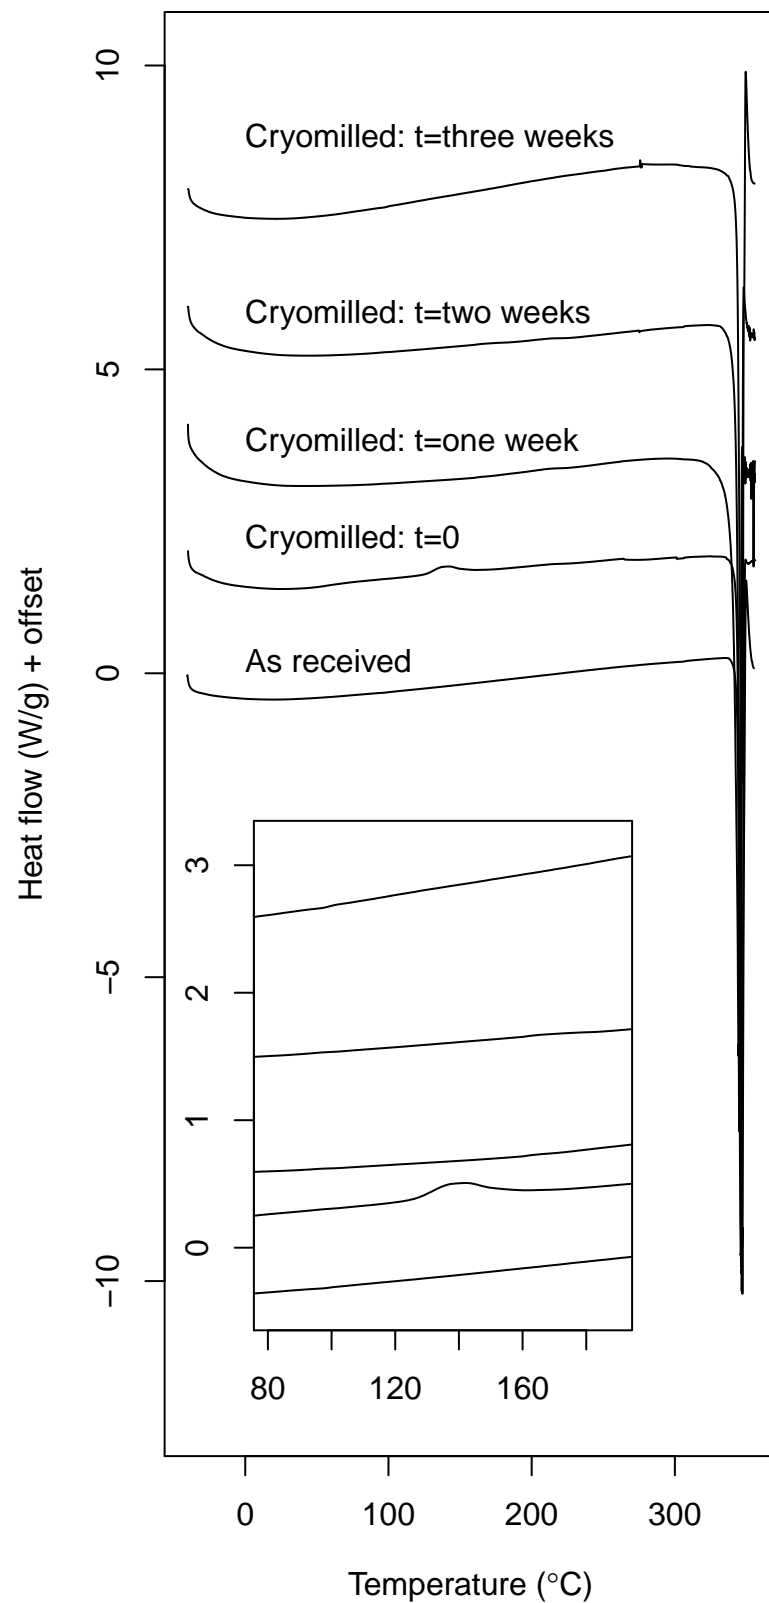

**c) Phthalic acid**

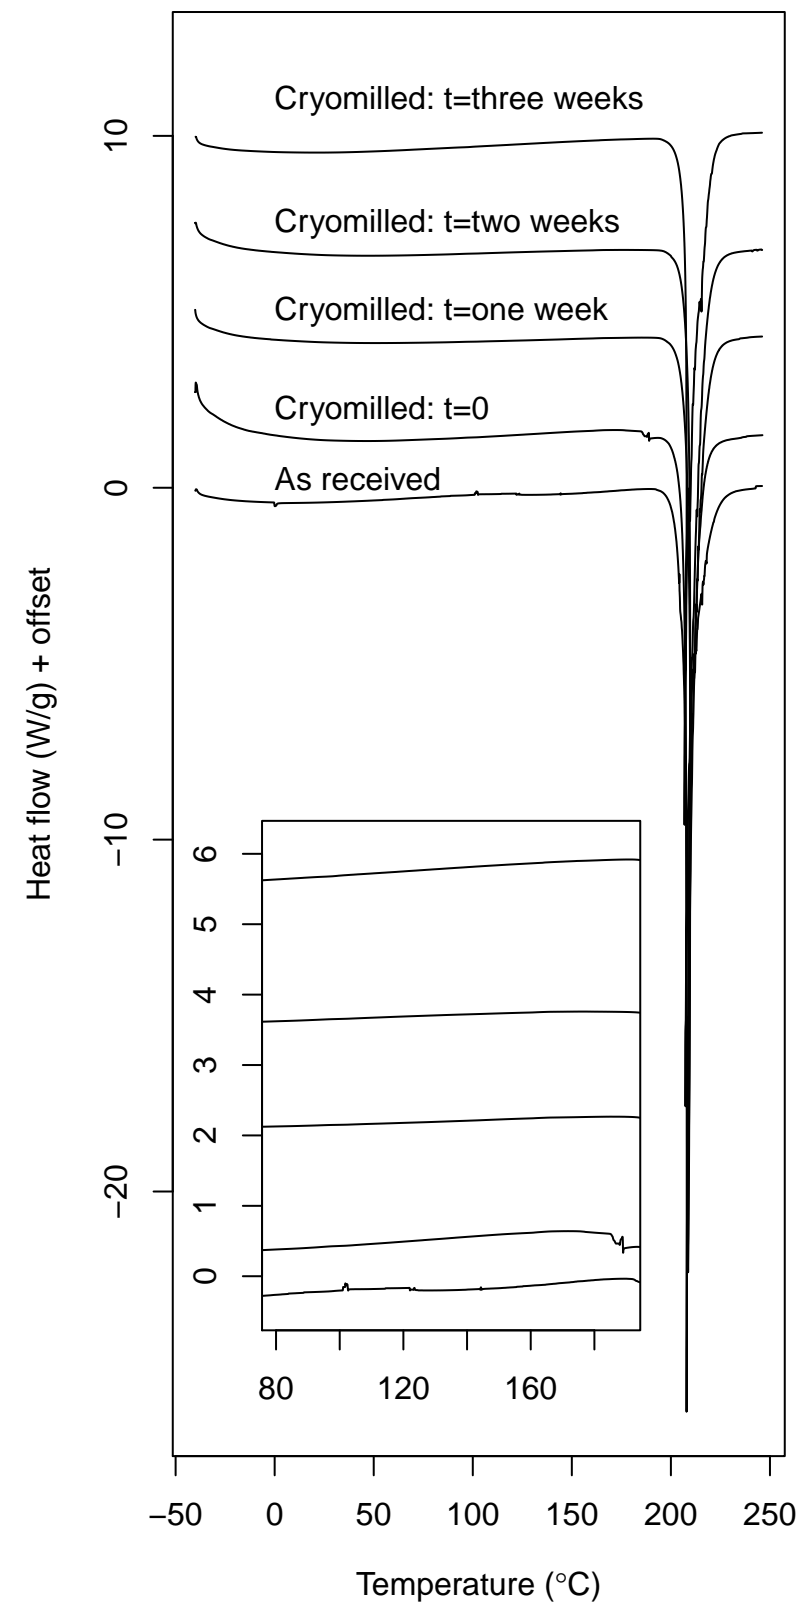

Supplement: s1 [file s1]

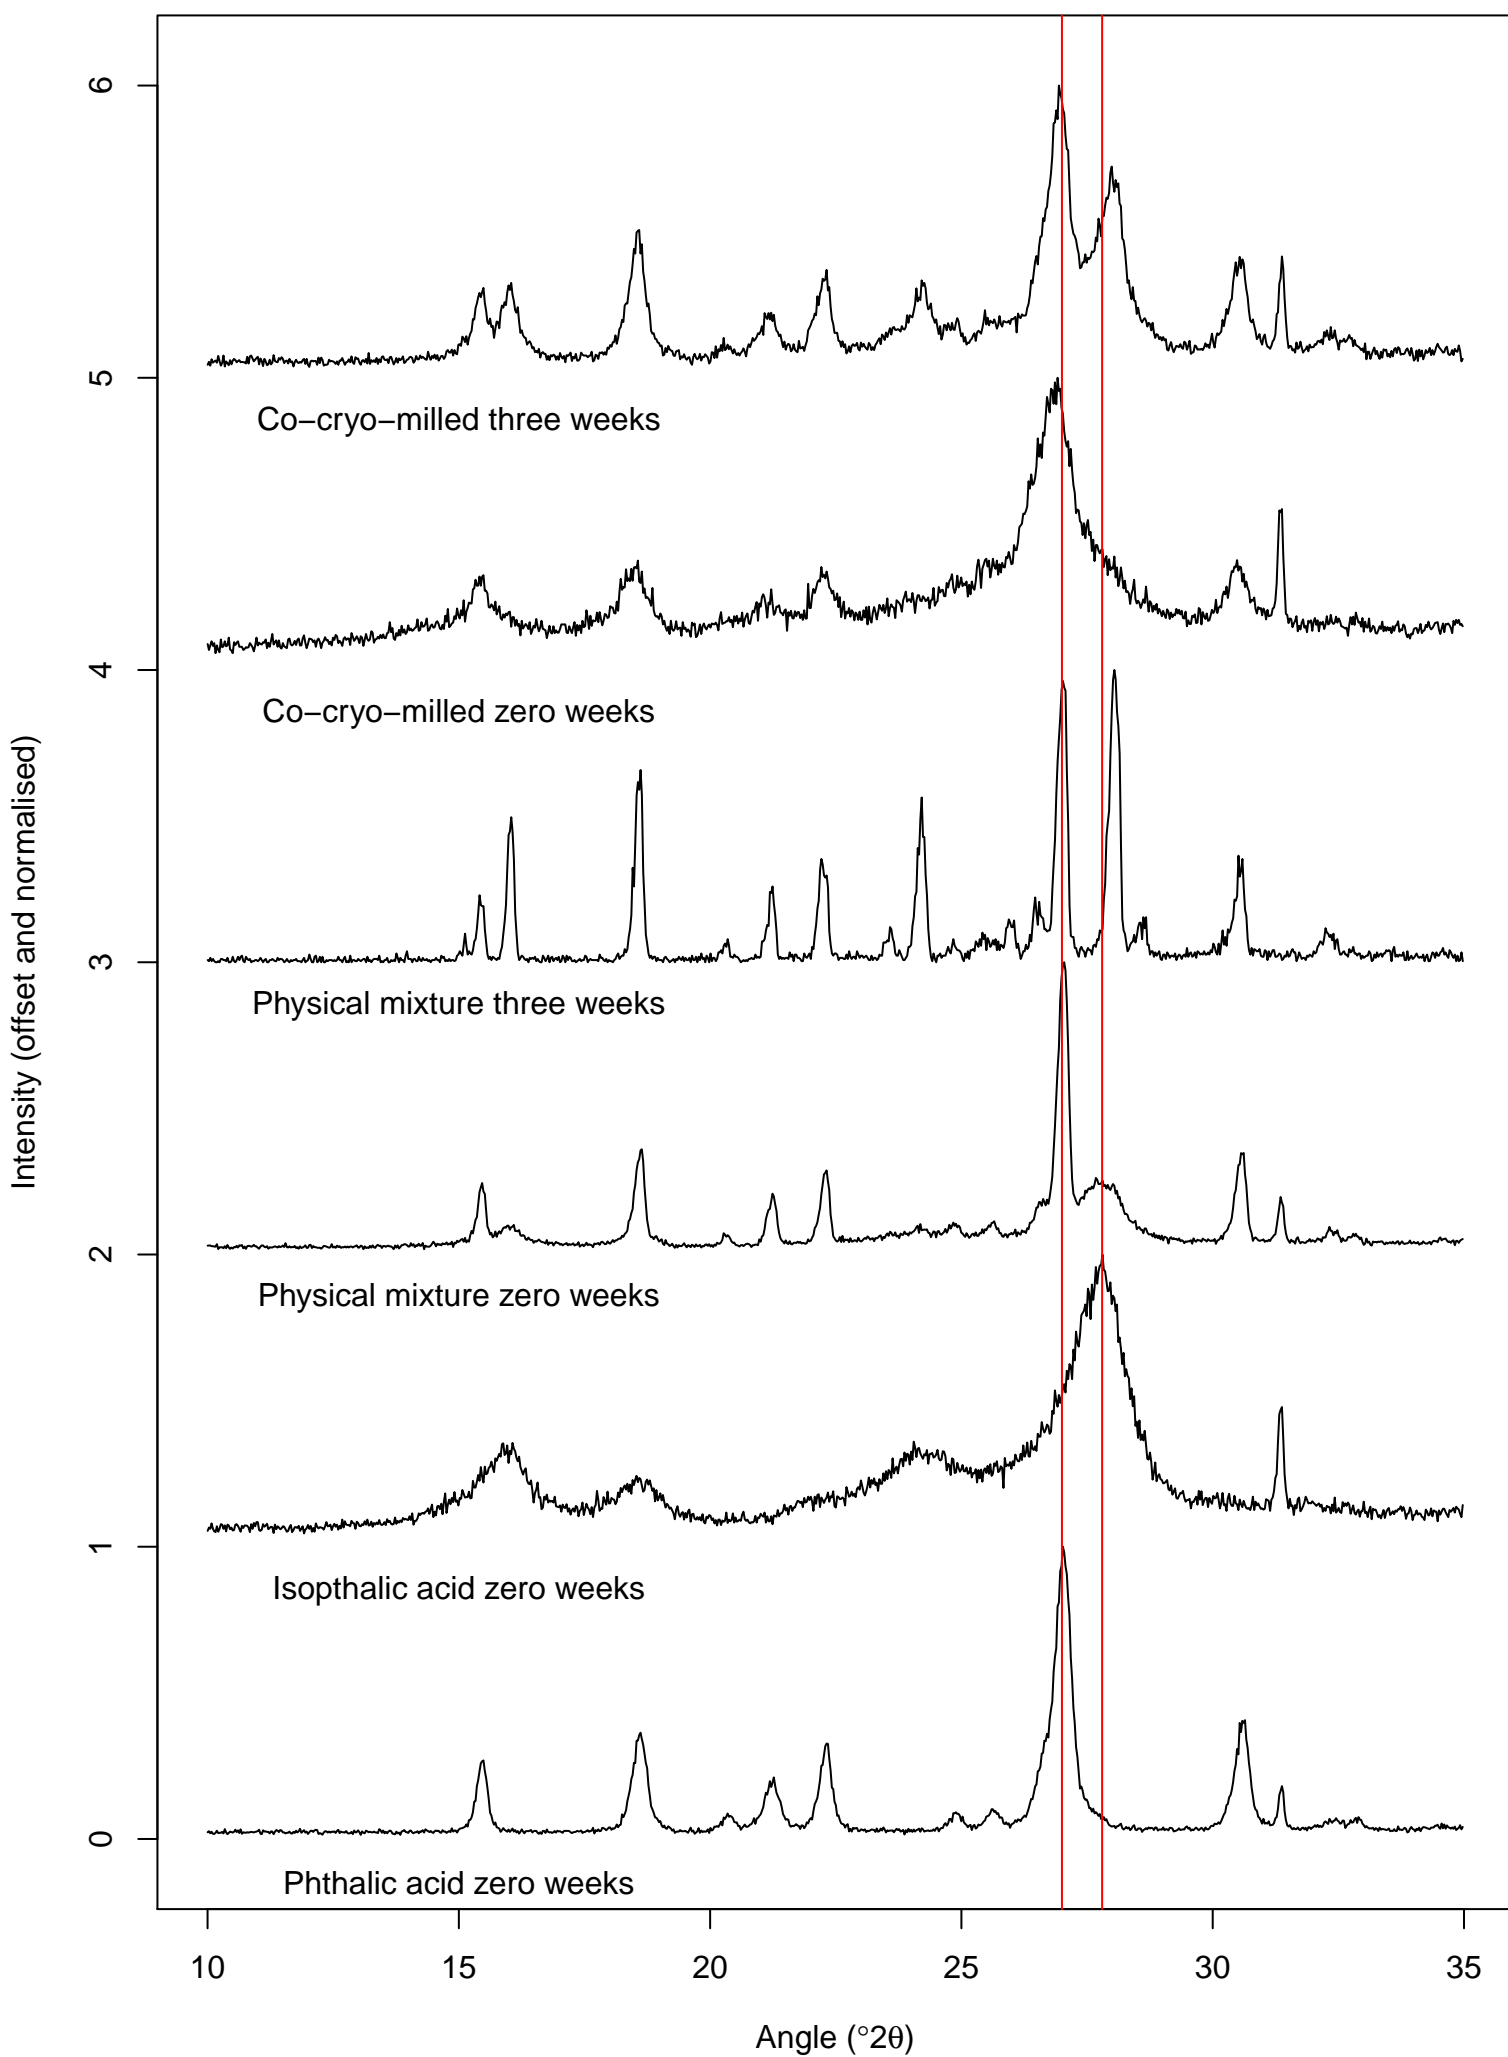

Supplement: s1 [file s1]

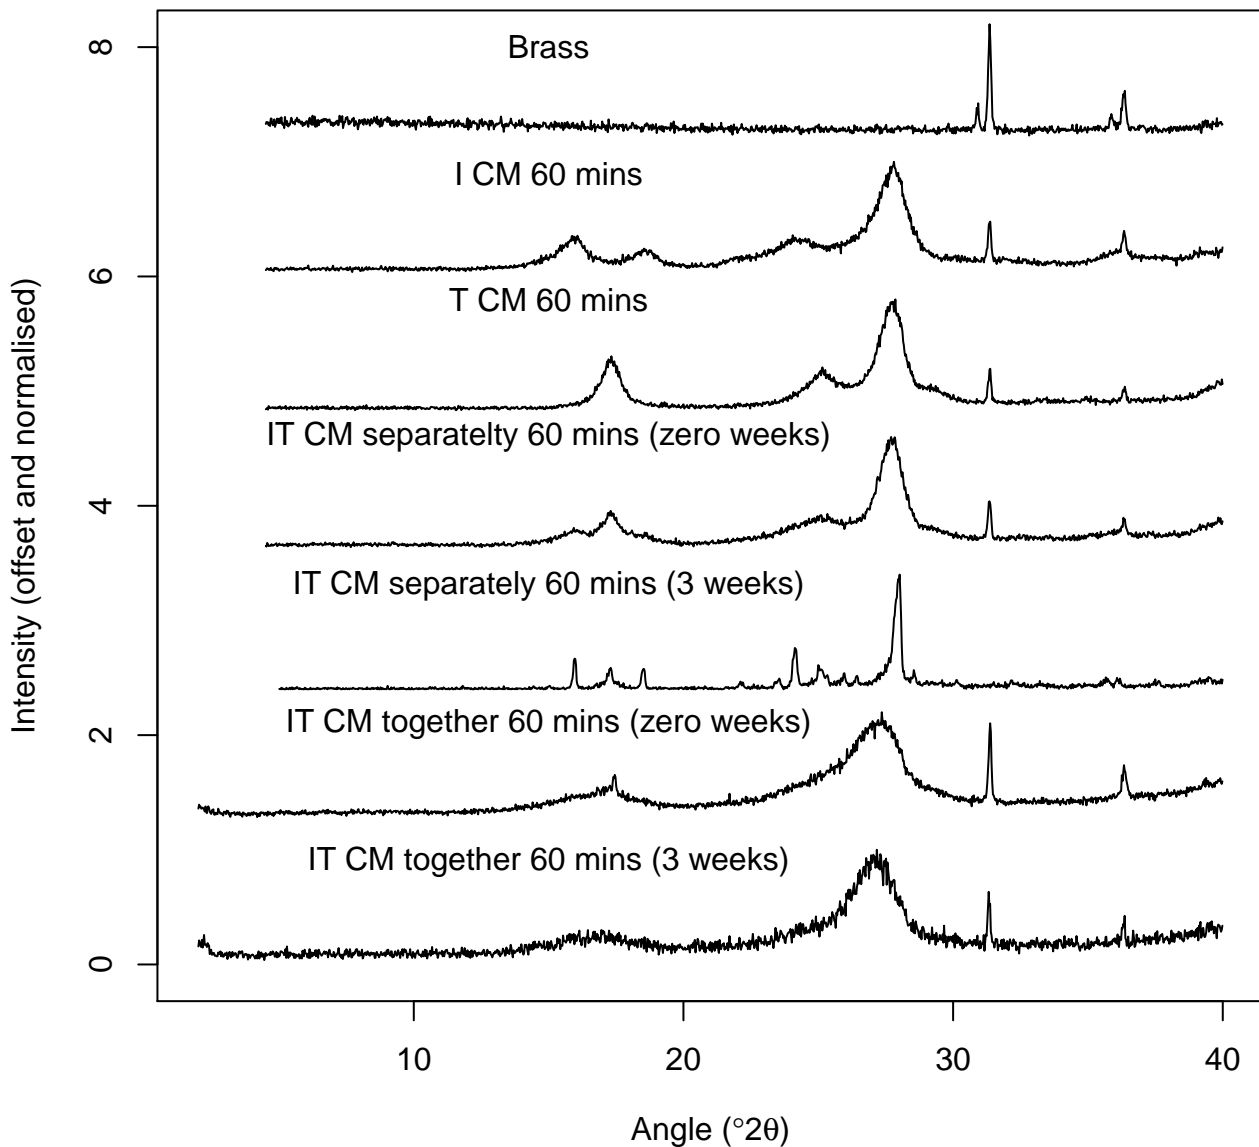

Supplement: s1 [file s1]

**a) Terephthalic acid**

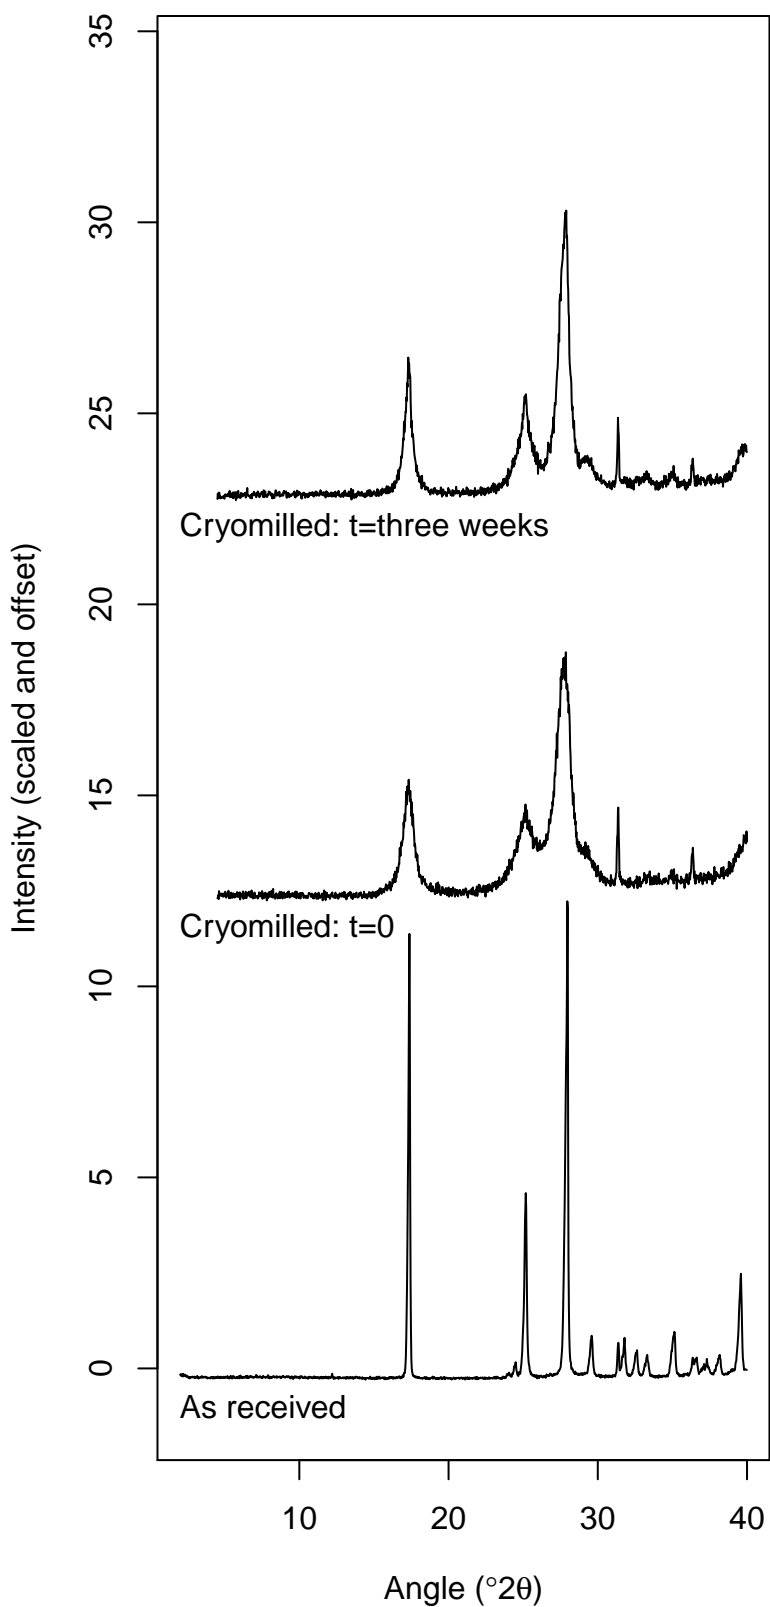

**b) Isophthalic acid**

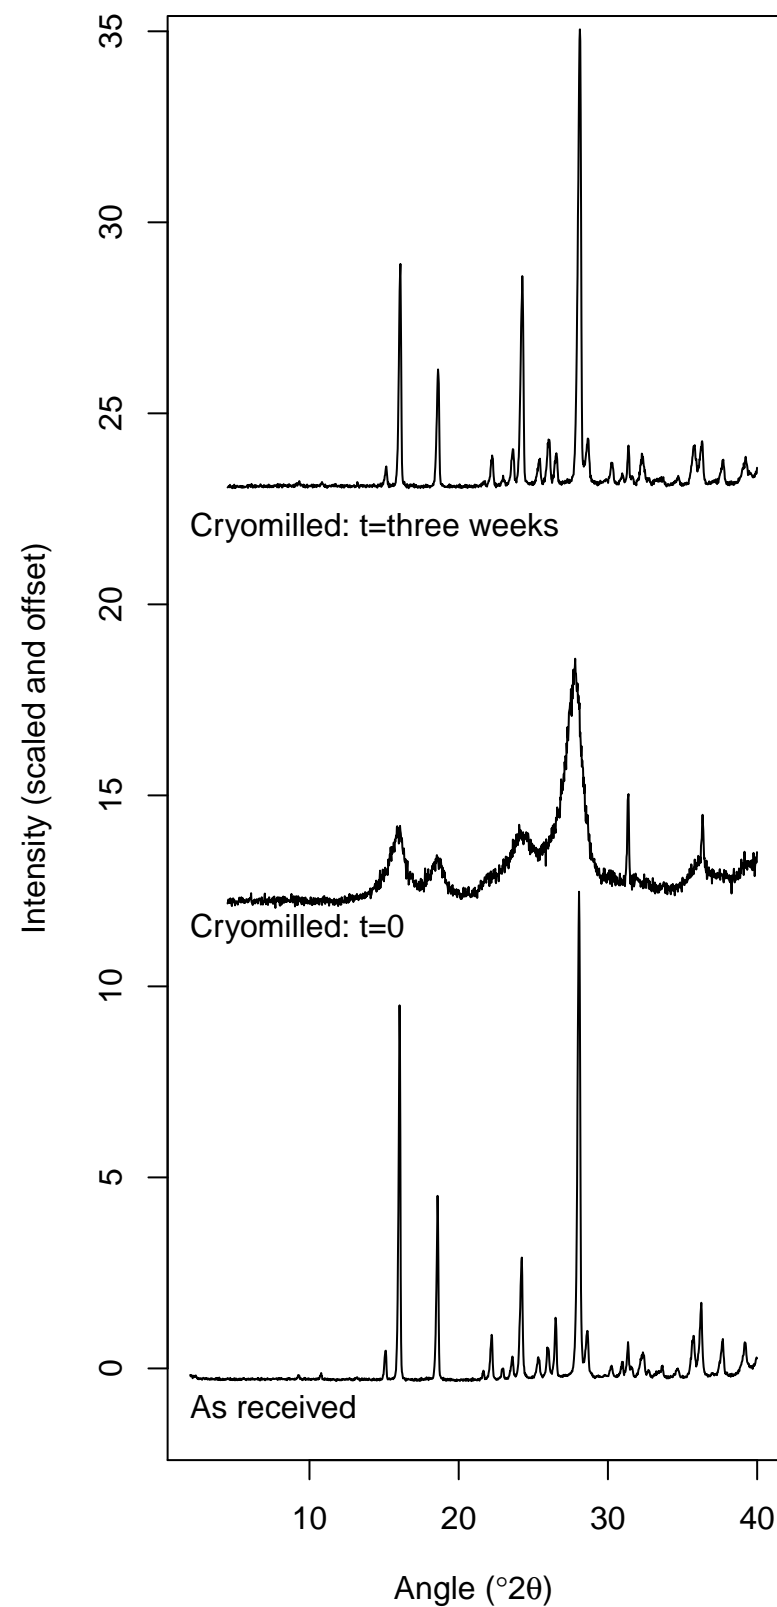

**c) Phthalic acid**

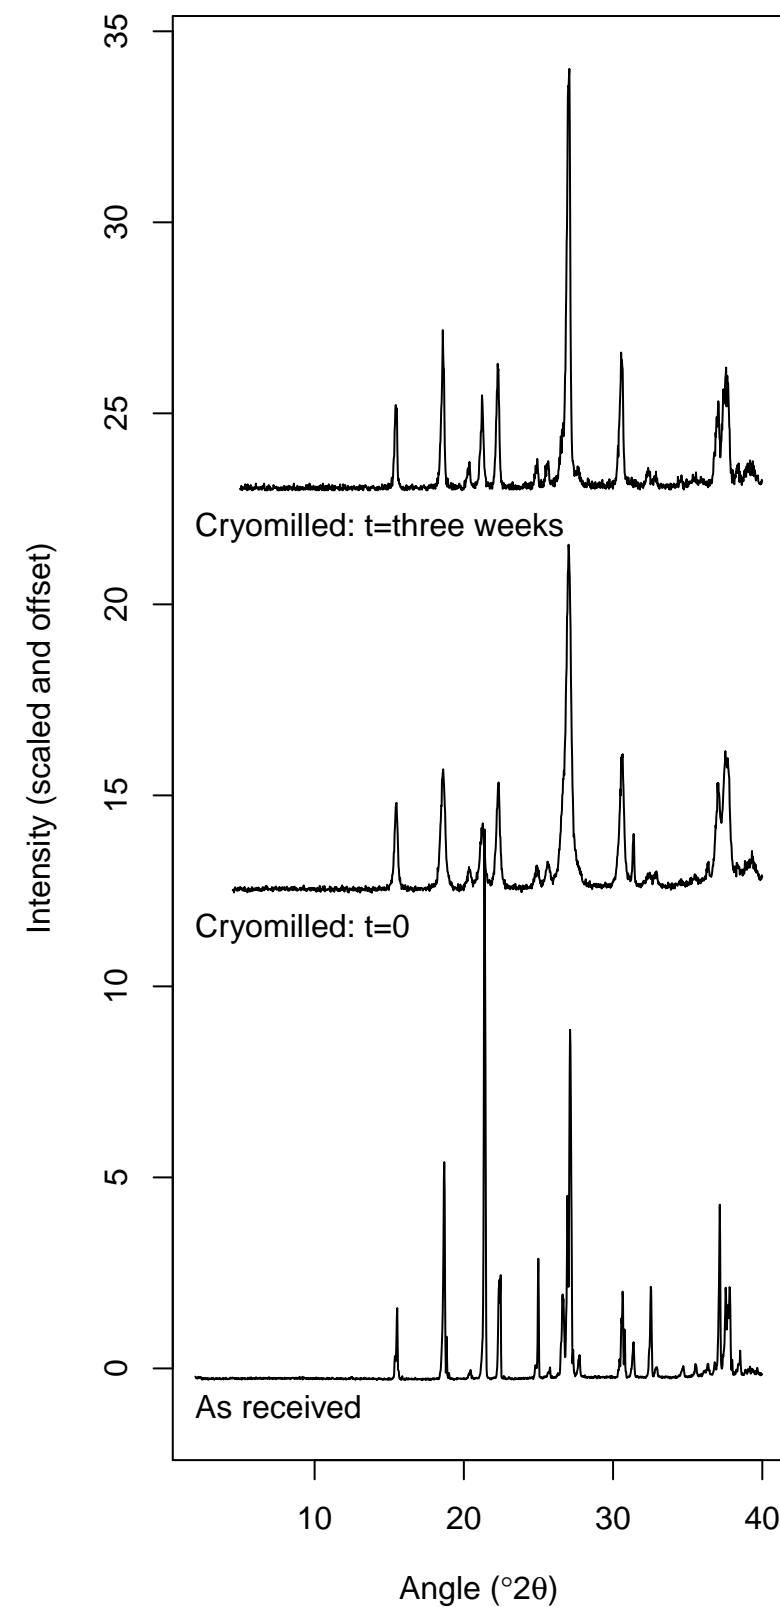

Supplement: s1 [file s1]

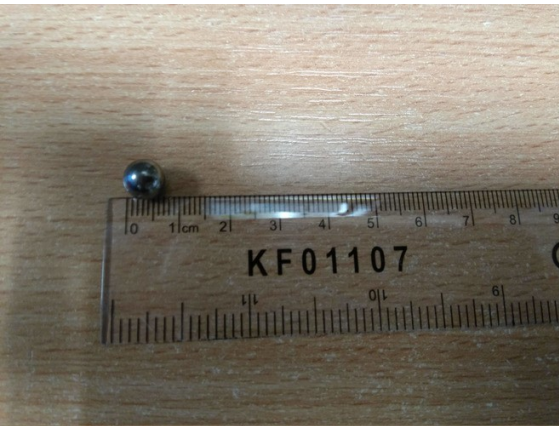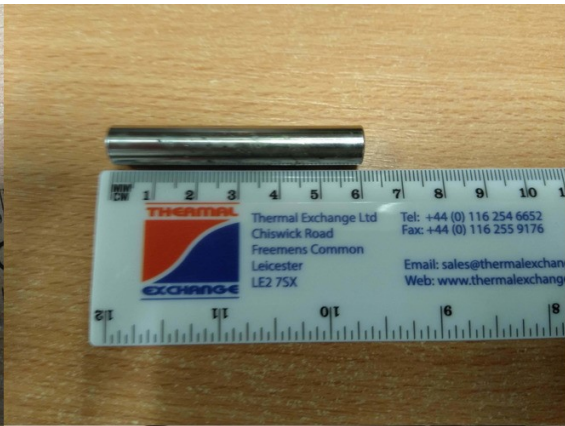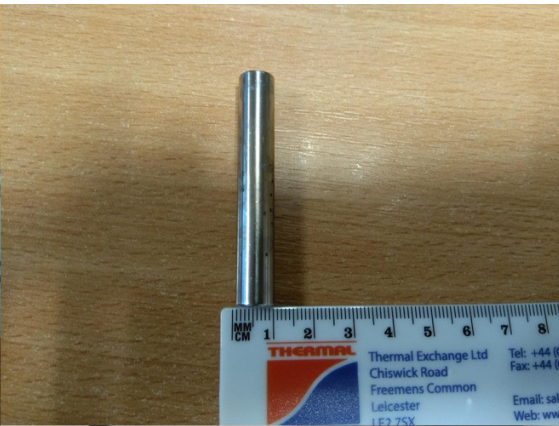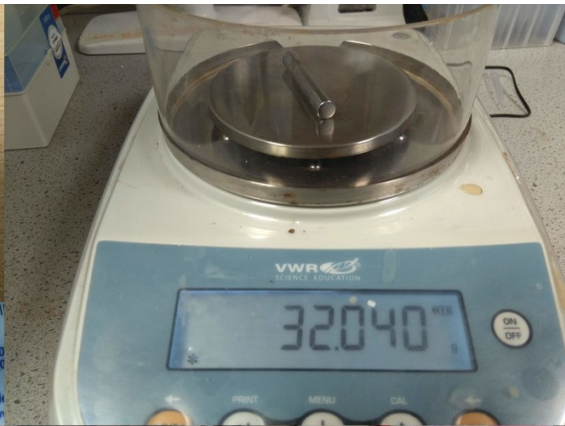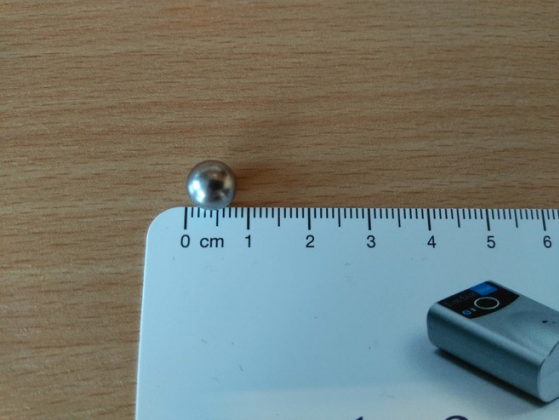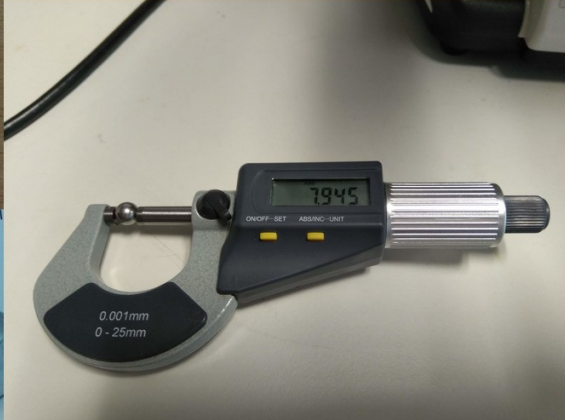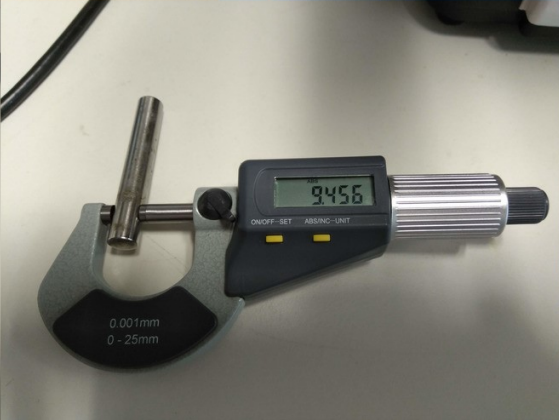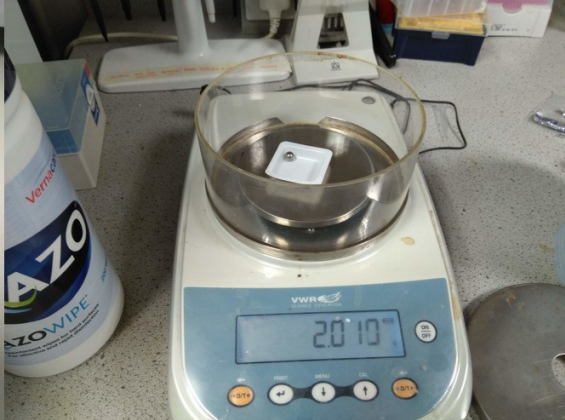

Supplement: s1 [file s1]

**a) Terephthalic and isophthalic**

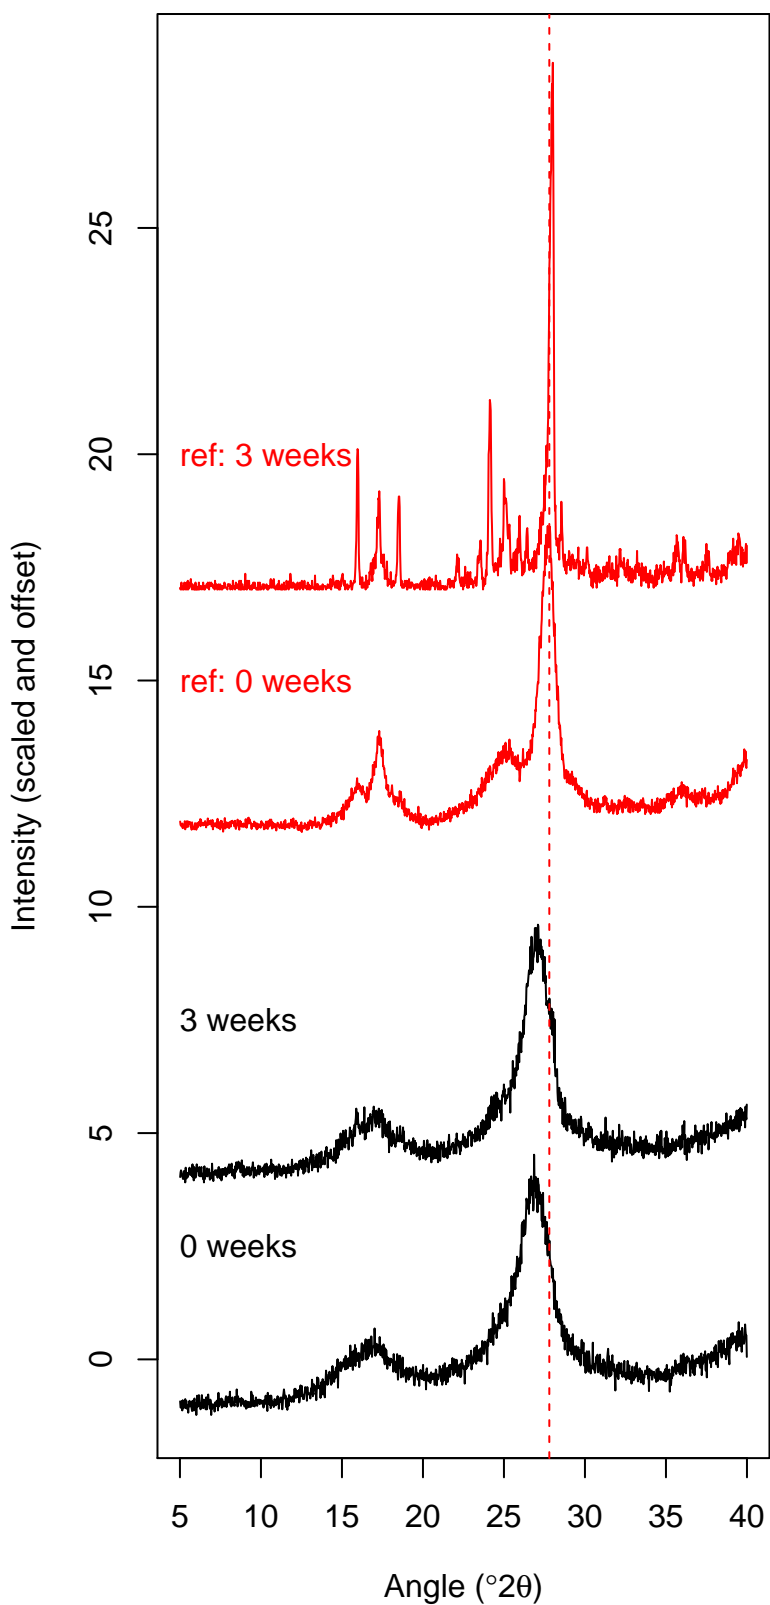

**b) Terephthalic and phthalic**

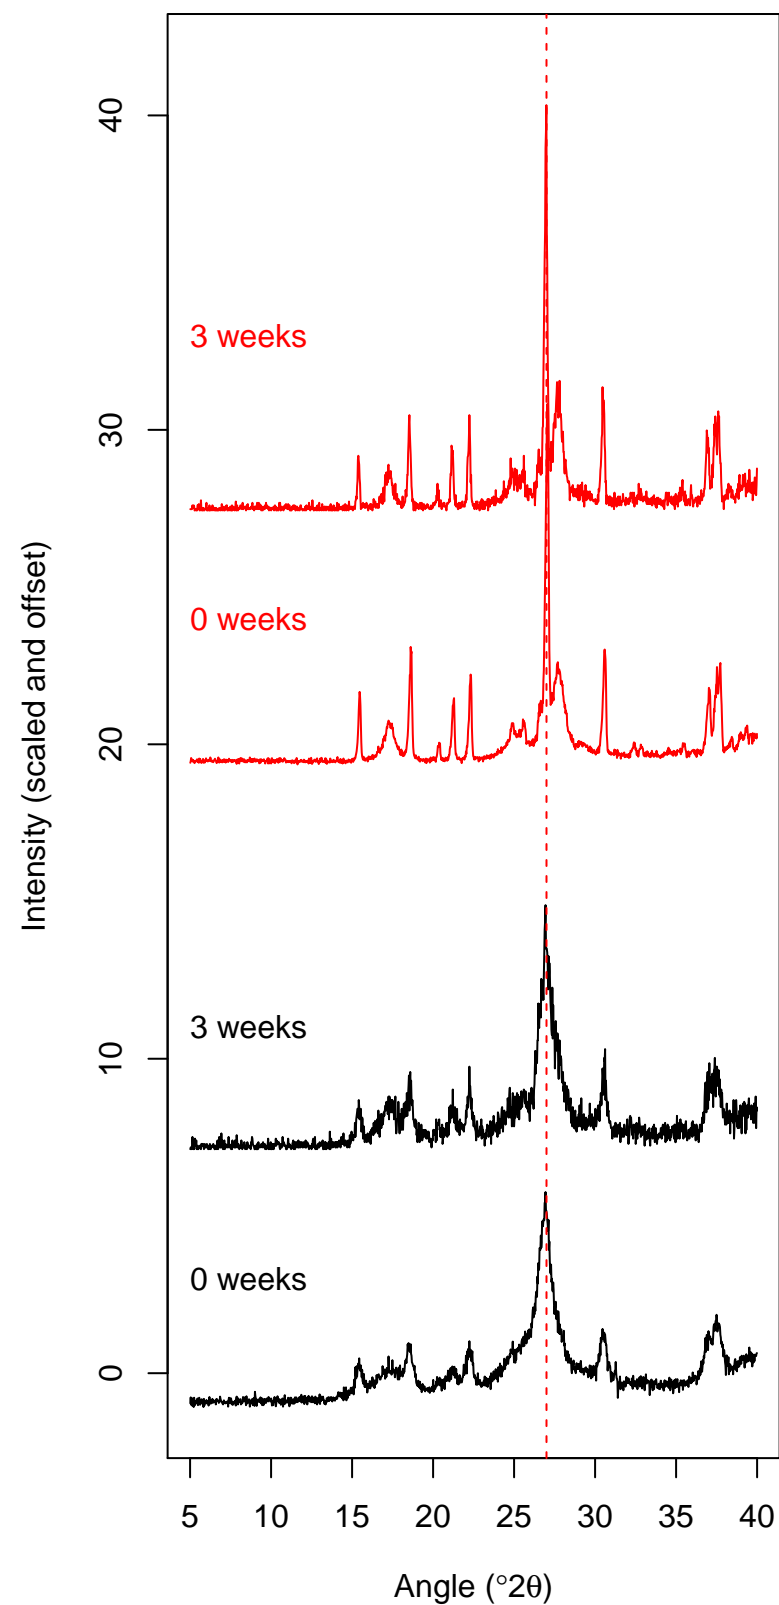

**c) Isophthalic and phthalic**

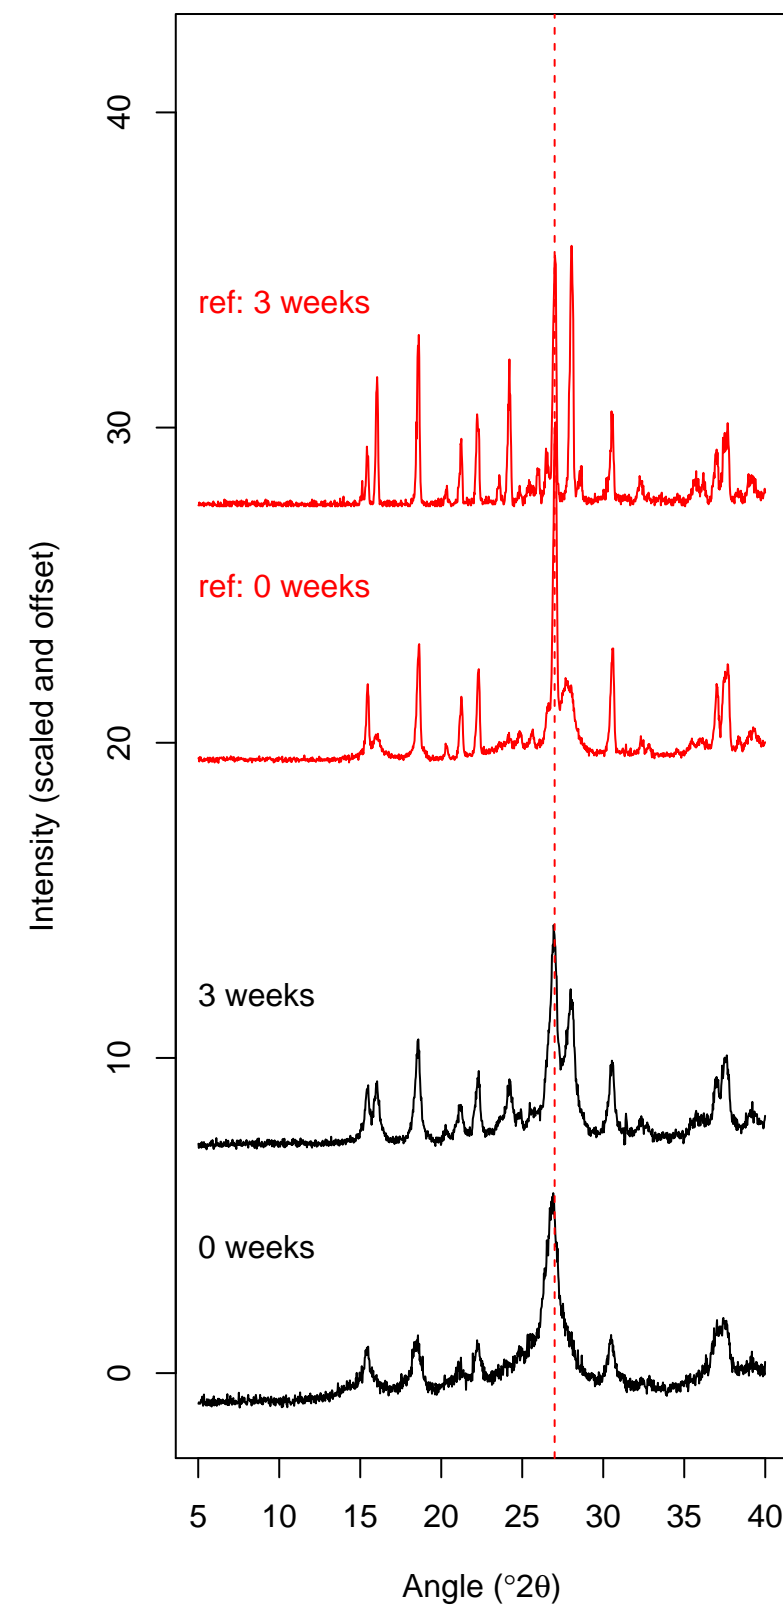

Supplement: s1 [file s1]

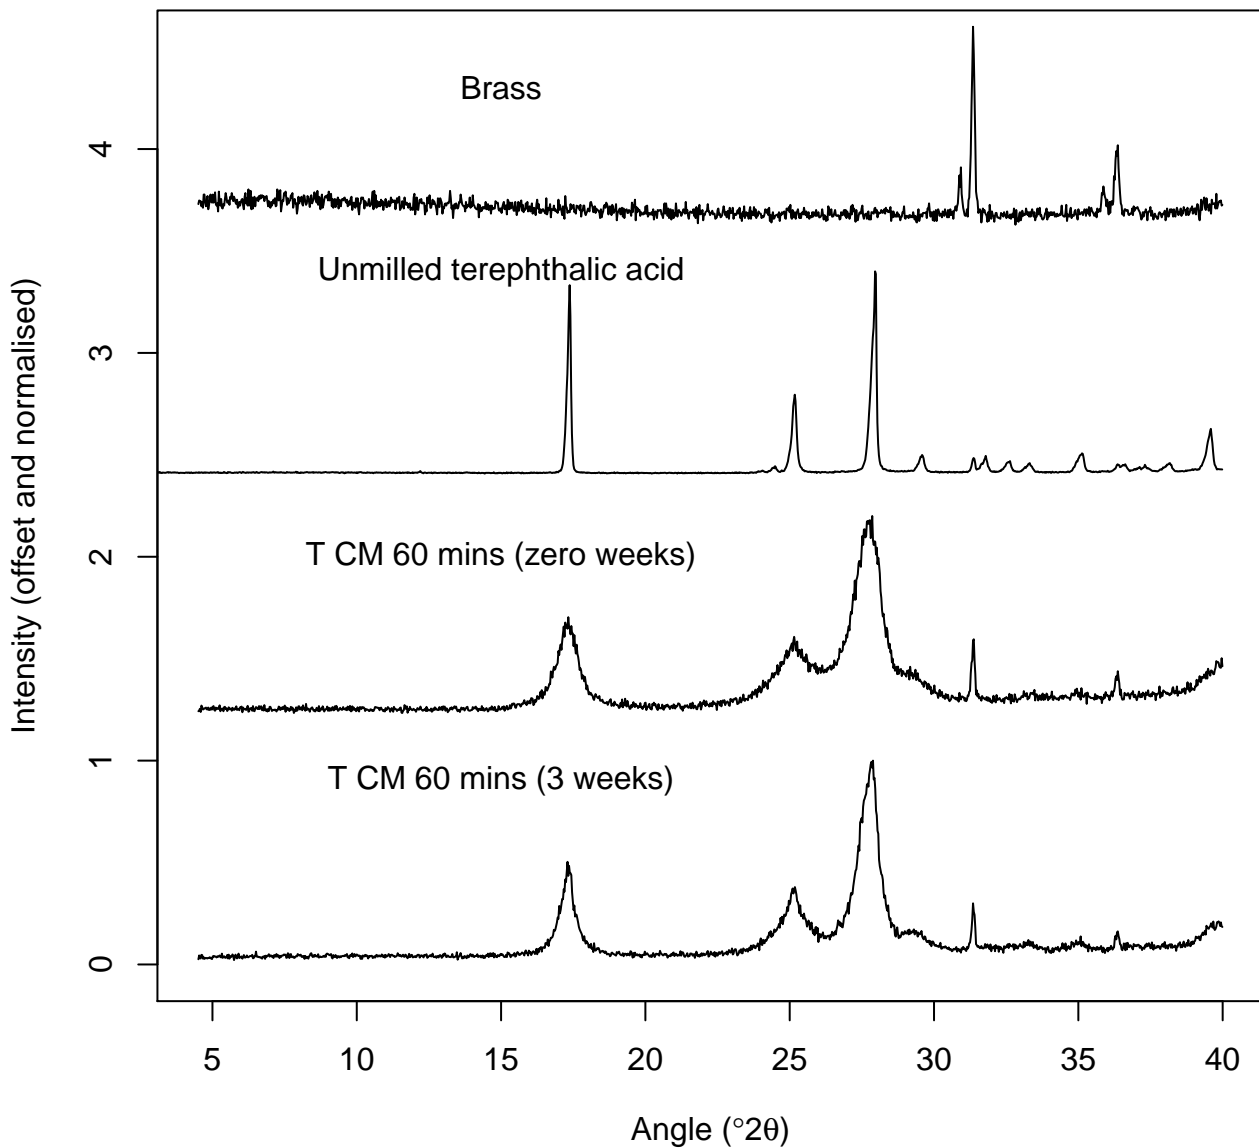

Supplement: s1 [file s1]

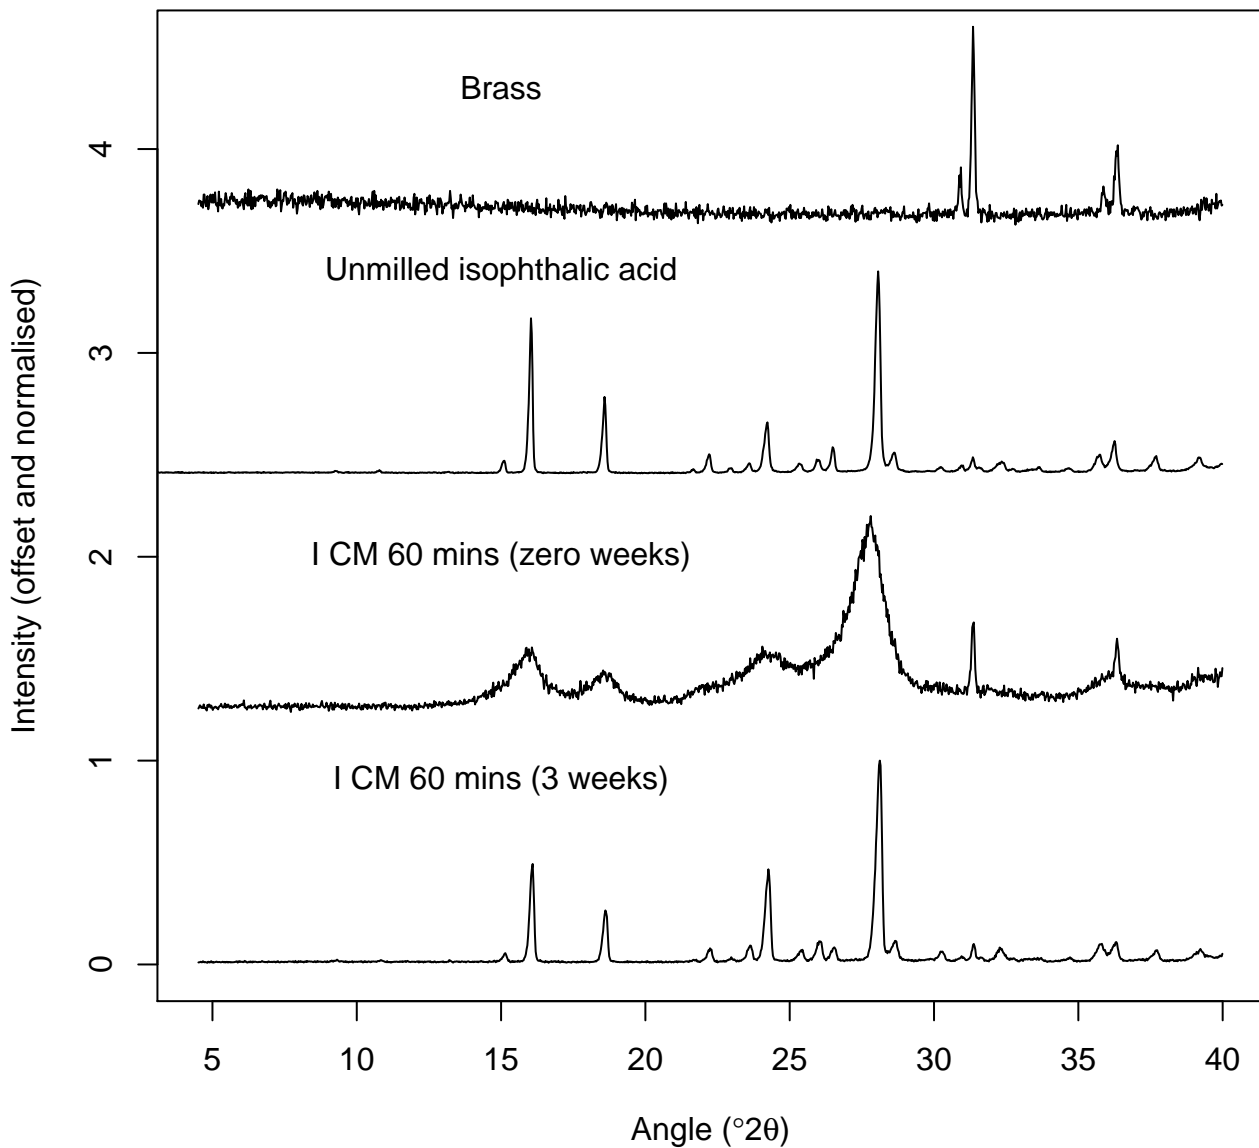

Supplement: s1 [file s1]

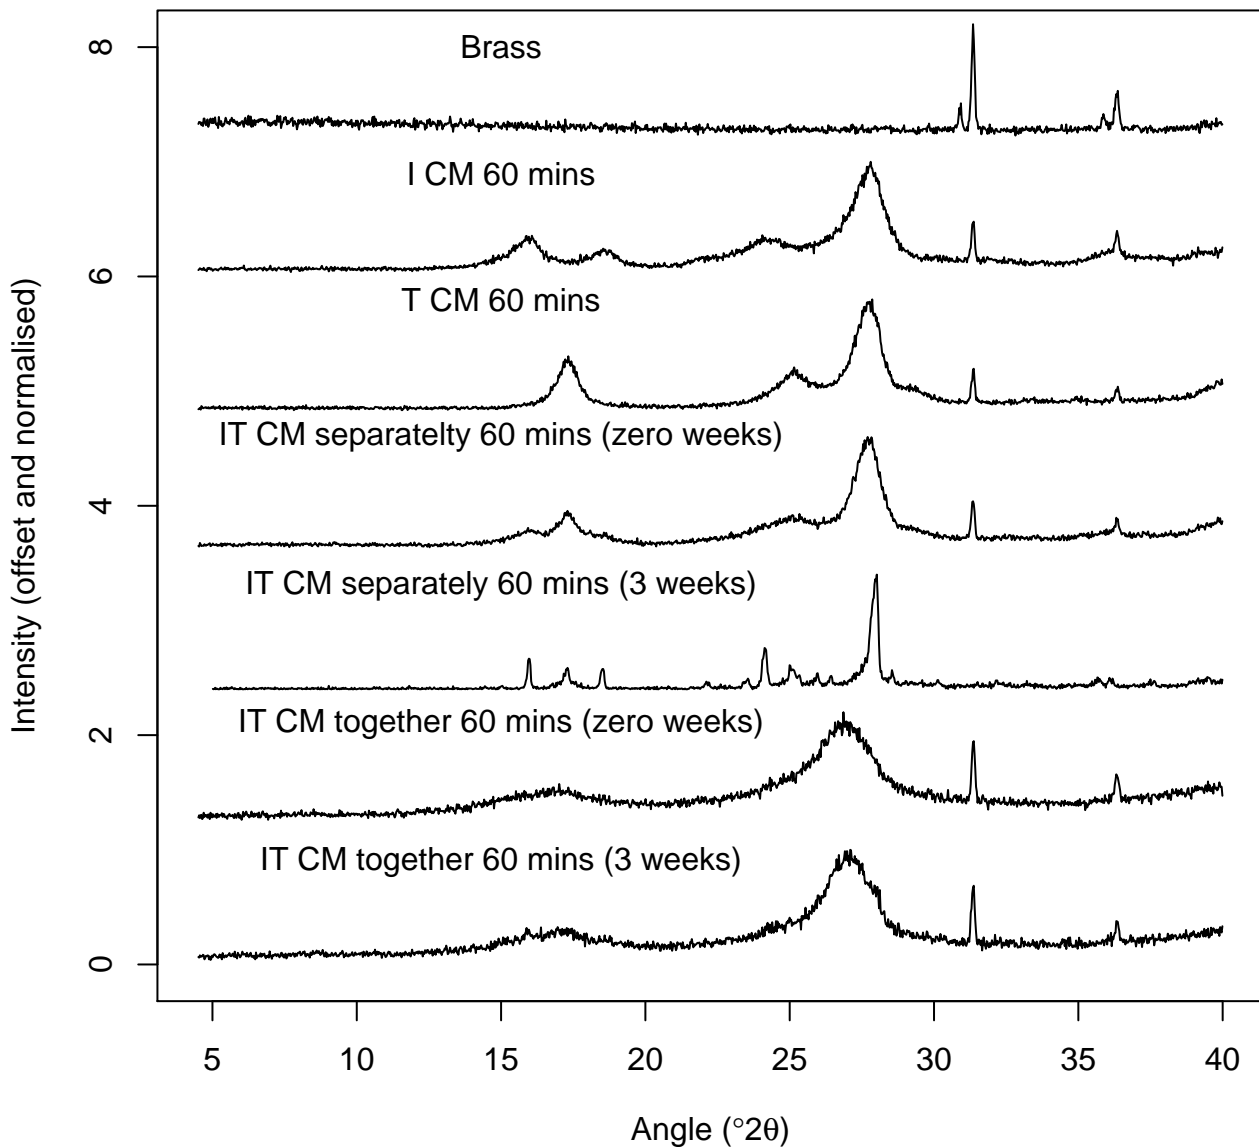

Supplement: s1 [file s1]

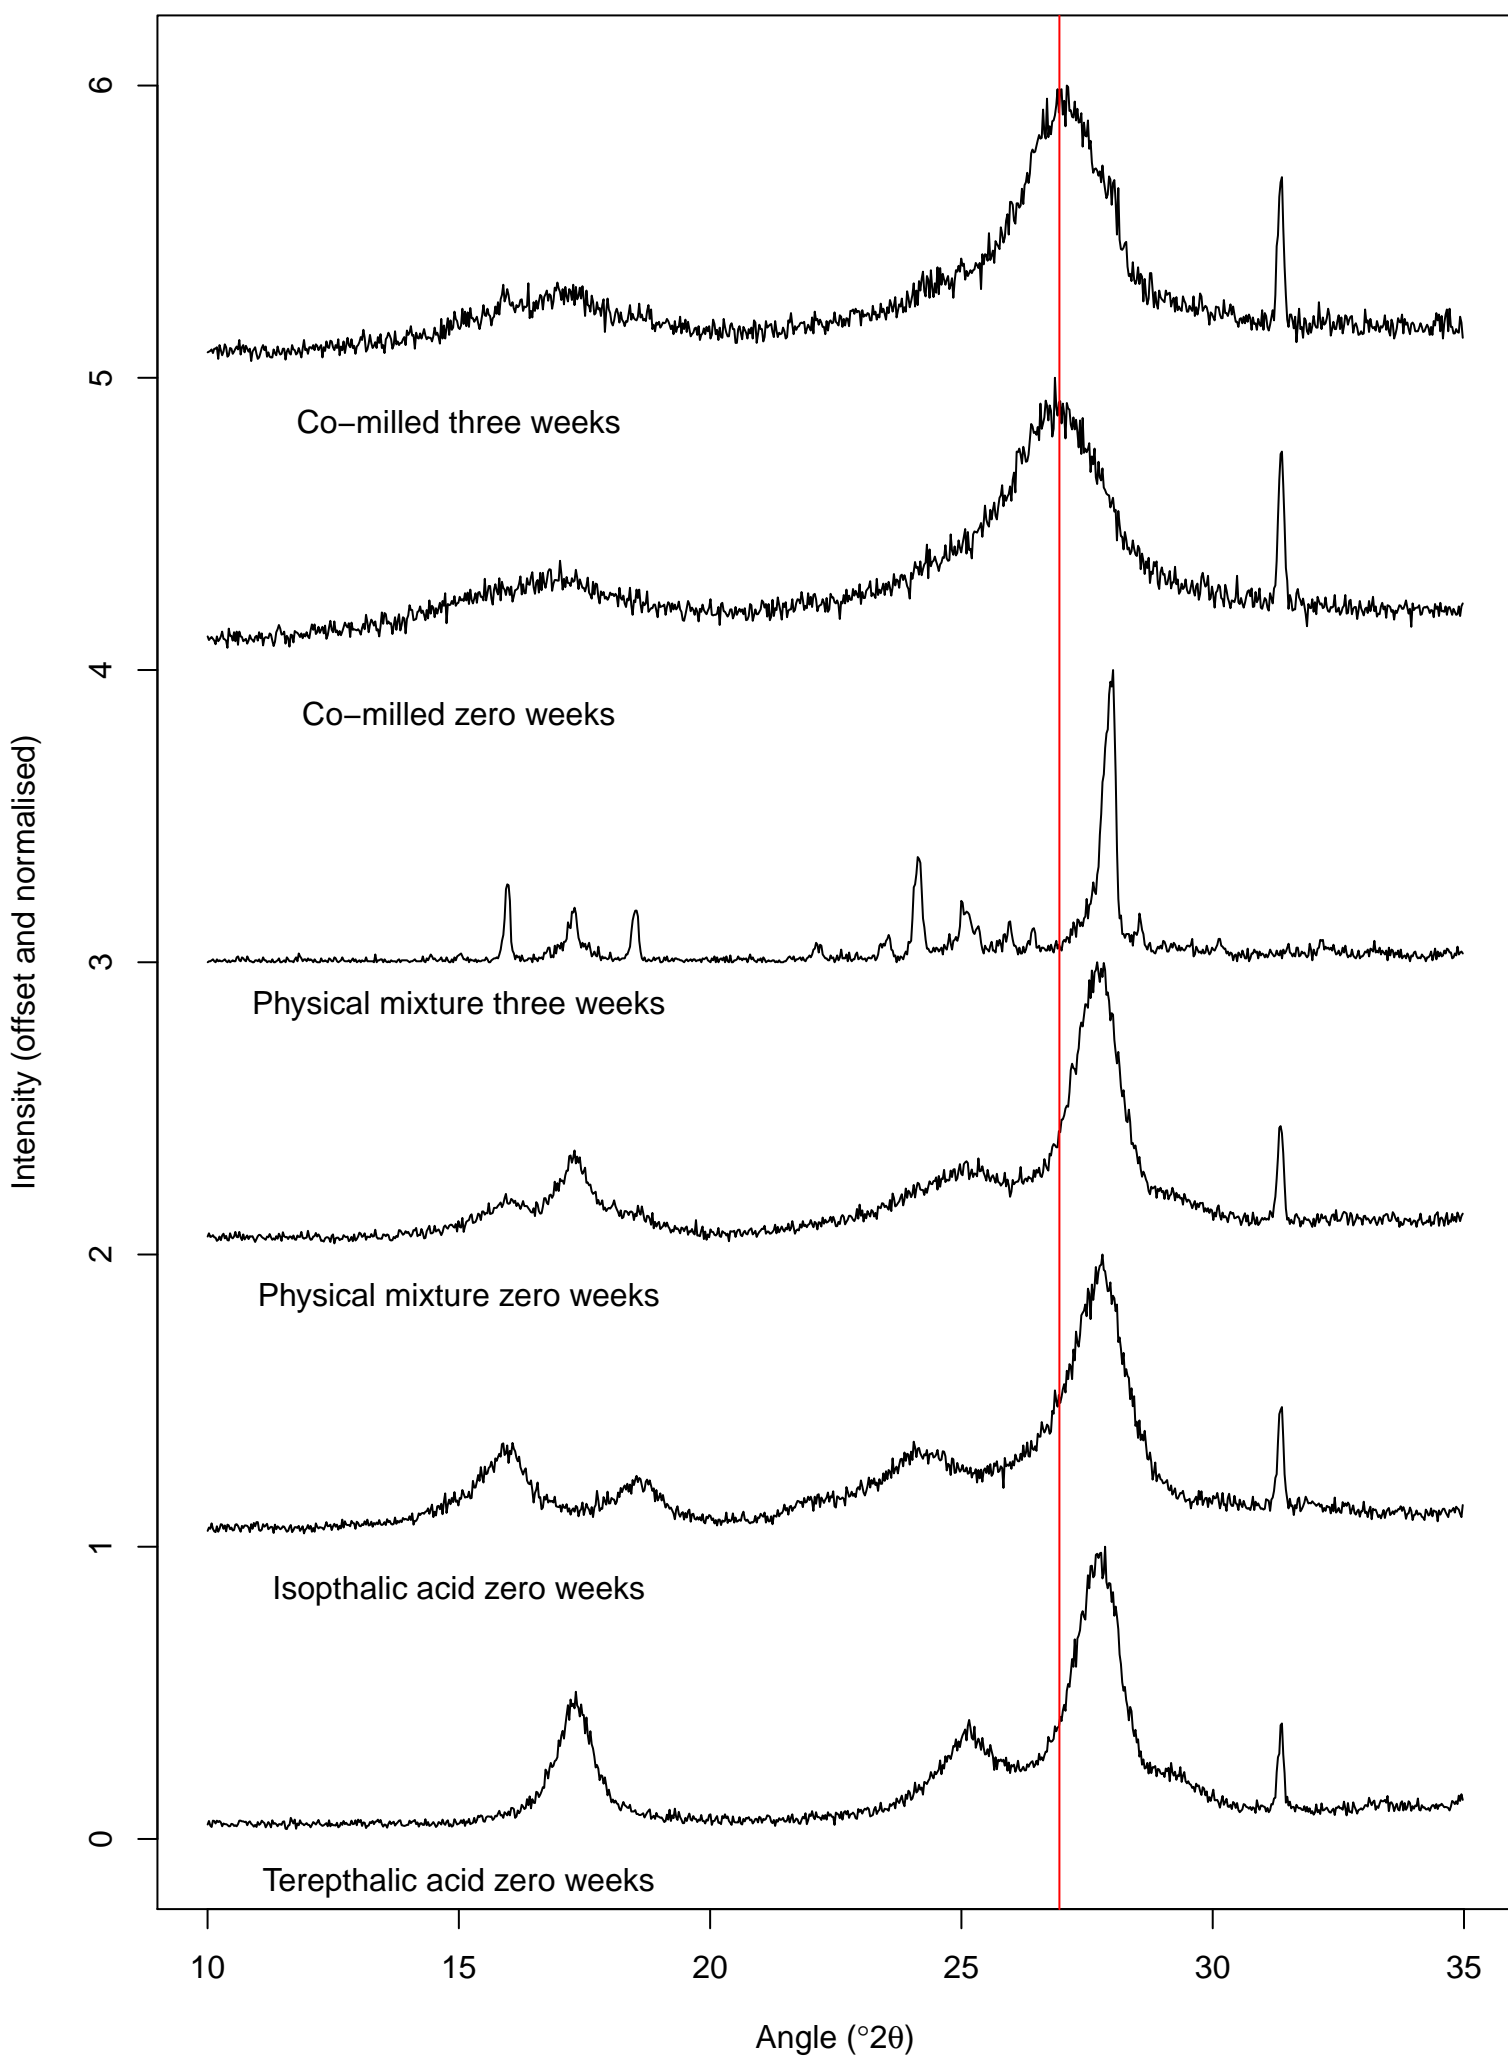

Supplement: s1 [file s1]

a) Terephthalic acid

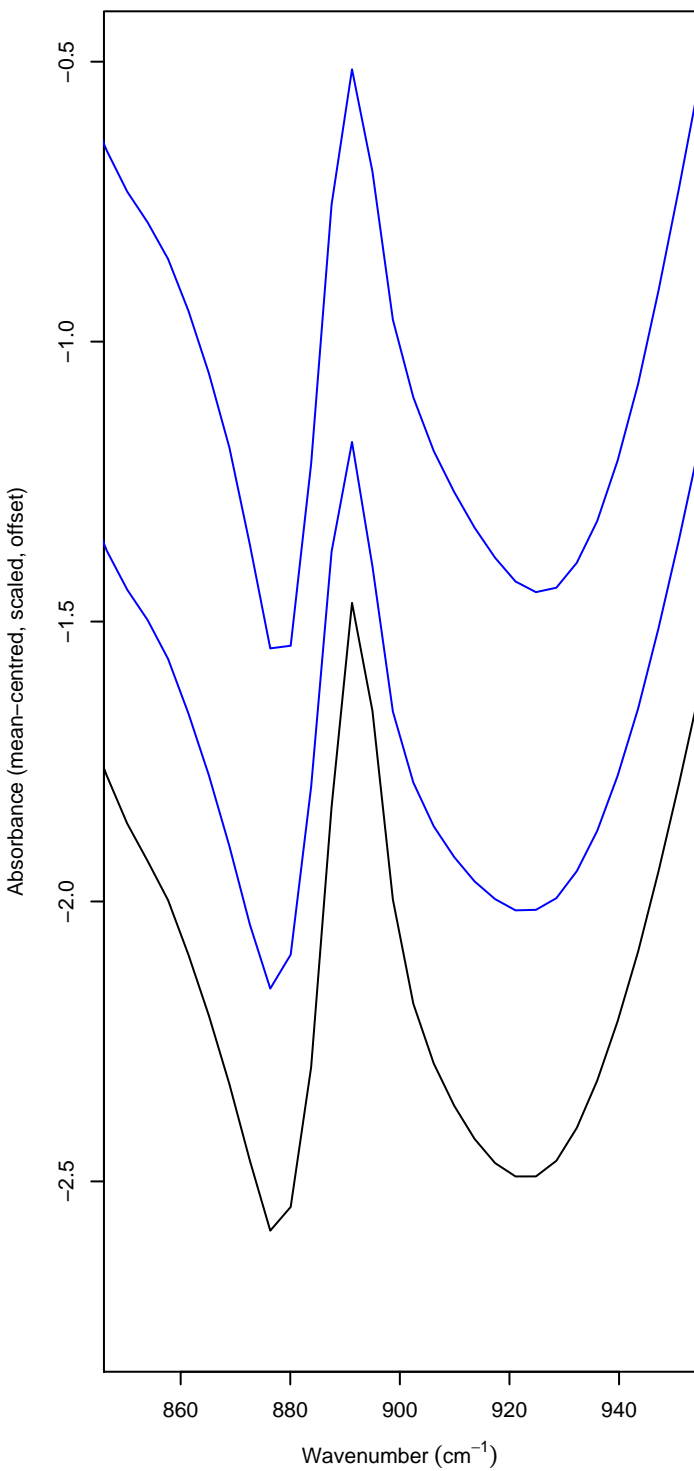

b) Isophthalic acid

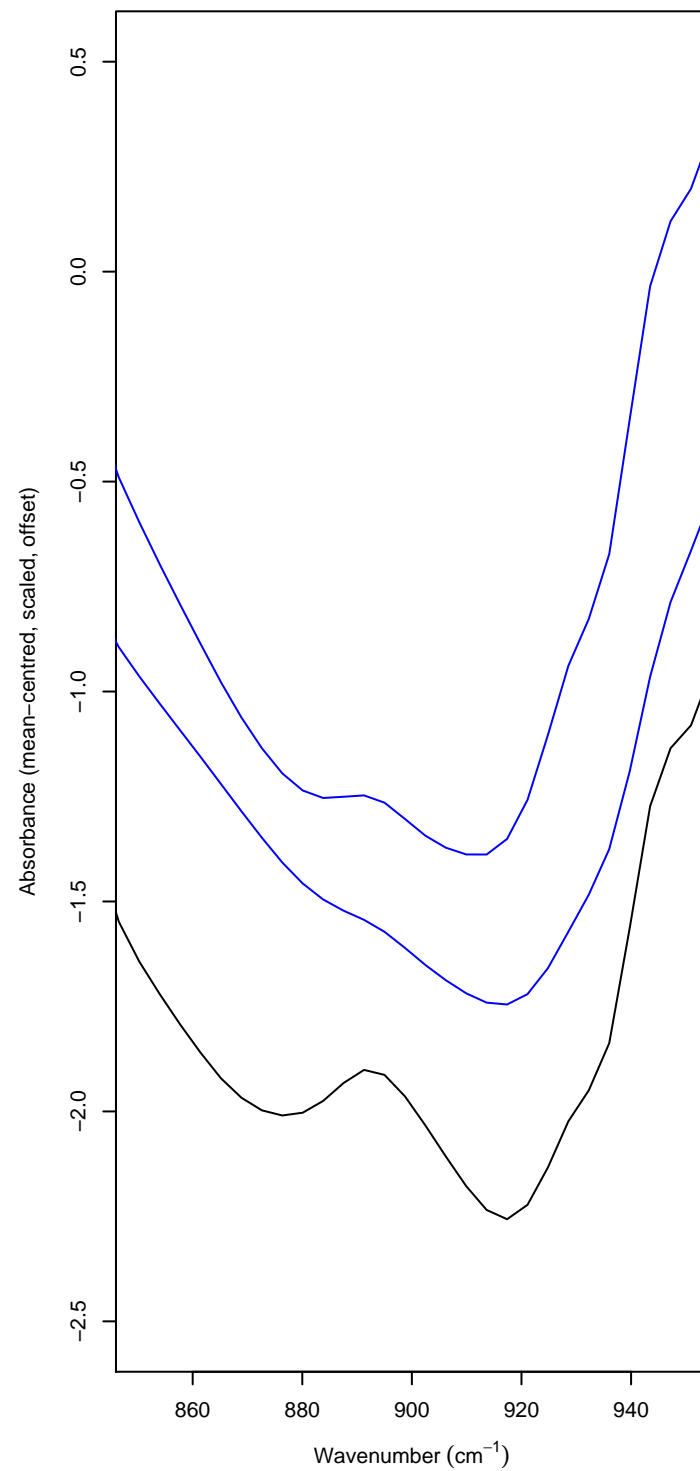

c) Phthalic acid

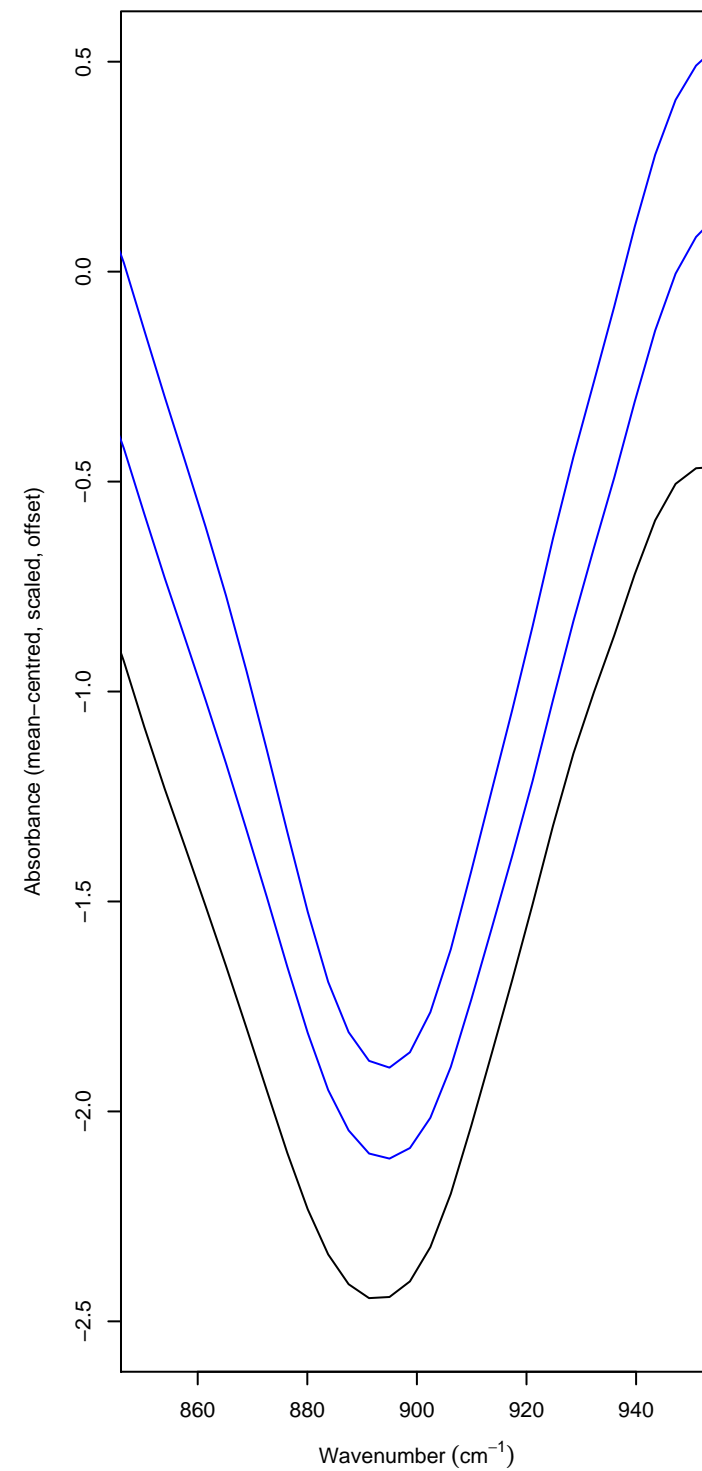

Supplement: s1 [file s1]

**a) Terephthalic + isophthalic acid**

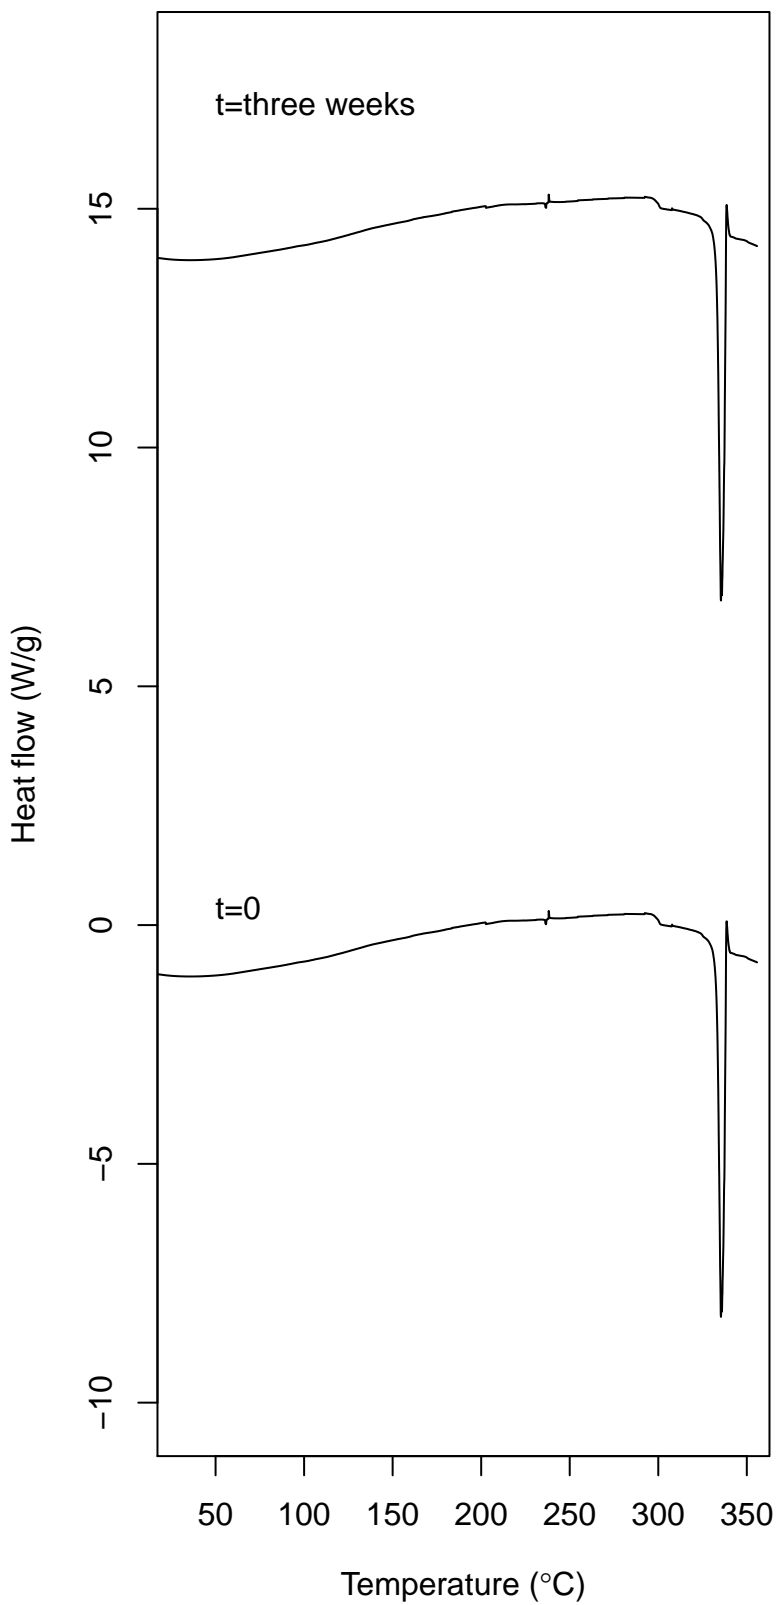

**b) Terephthalic + phthalic acid**

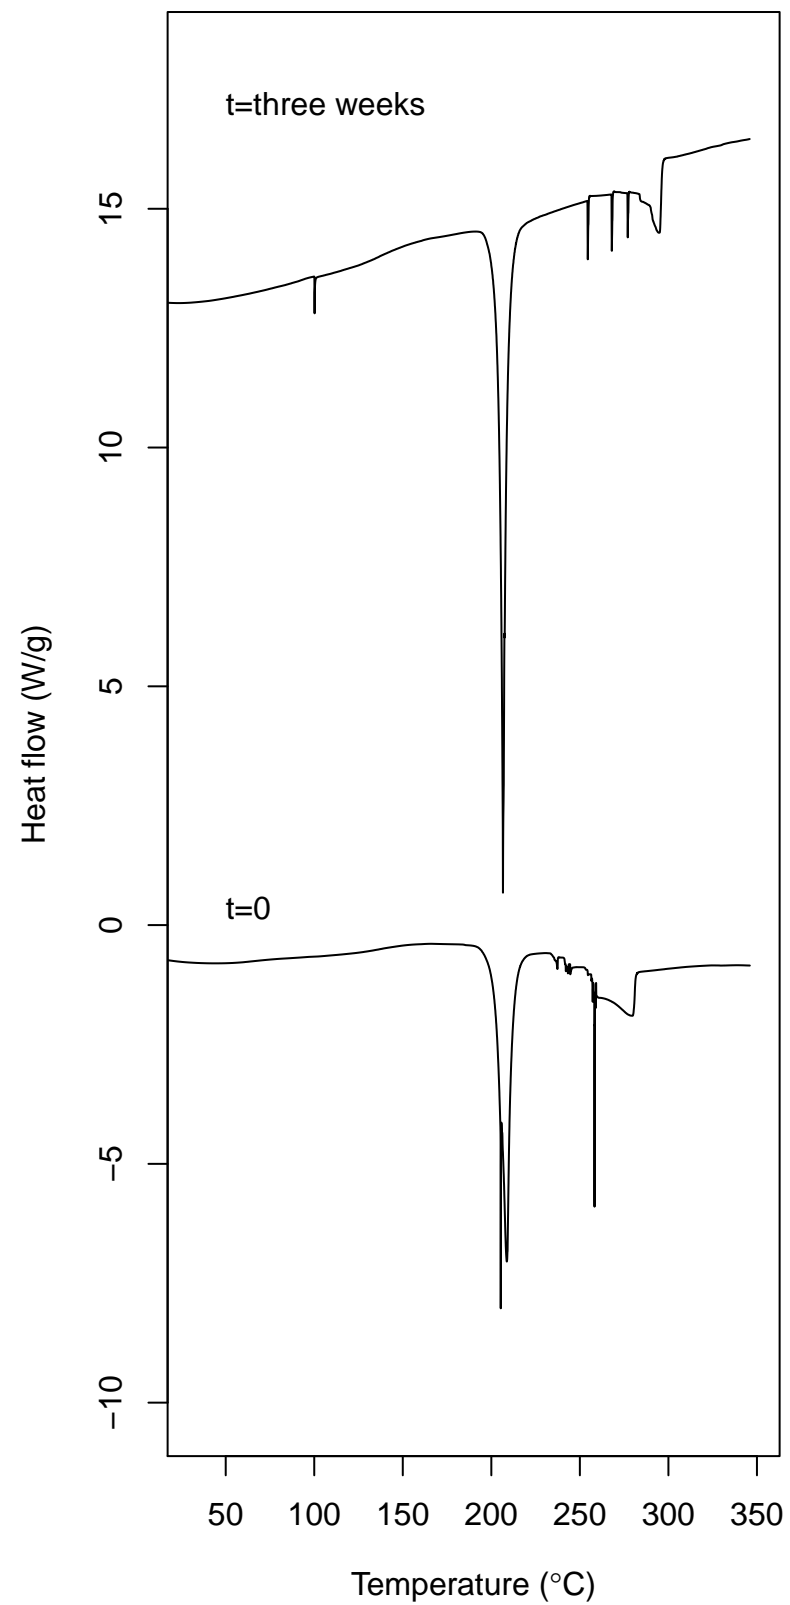

**c) Isophthalic + phthalic acid**

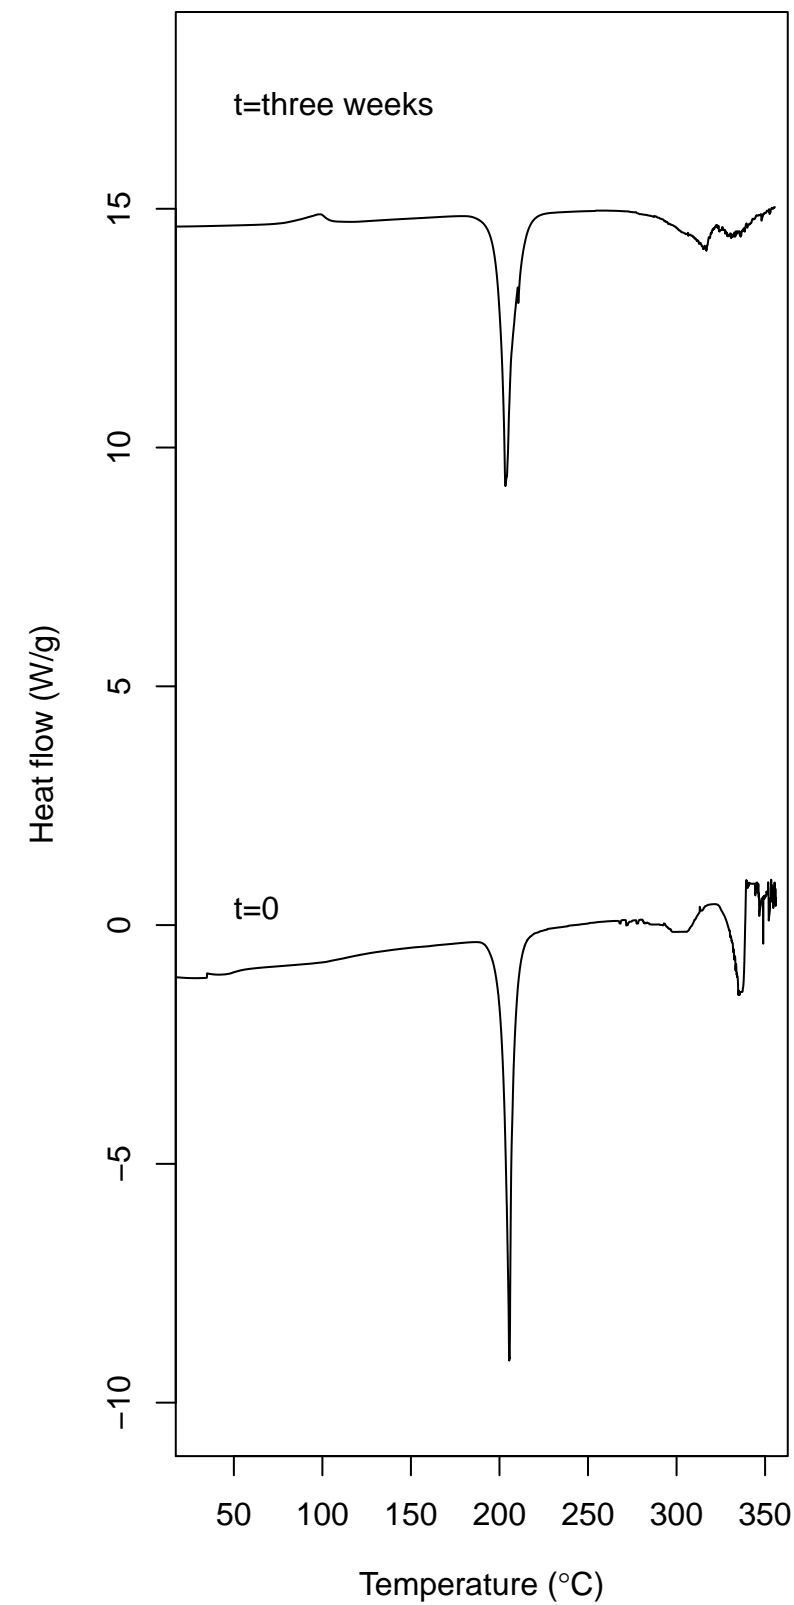

Supplement: s1 [file s1]

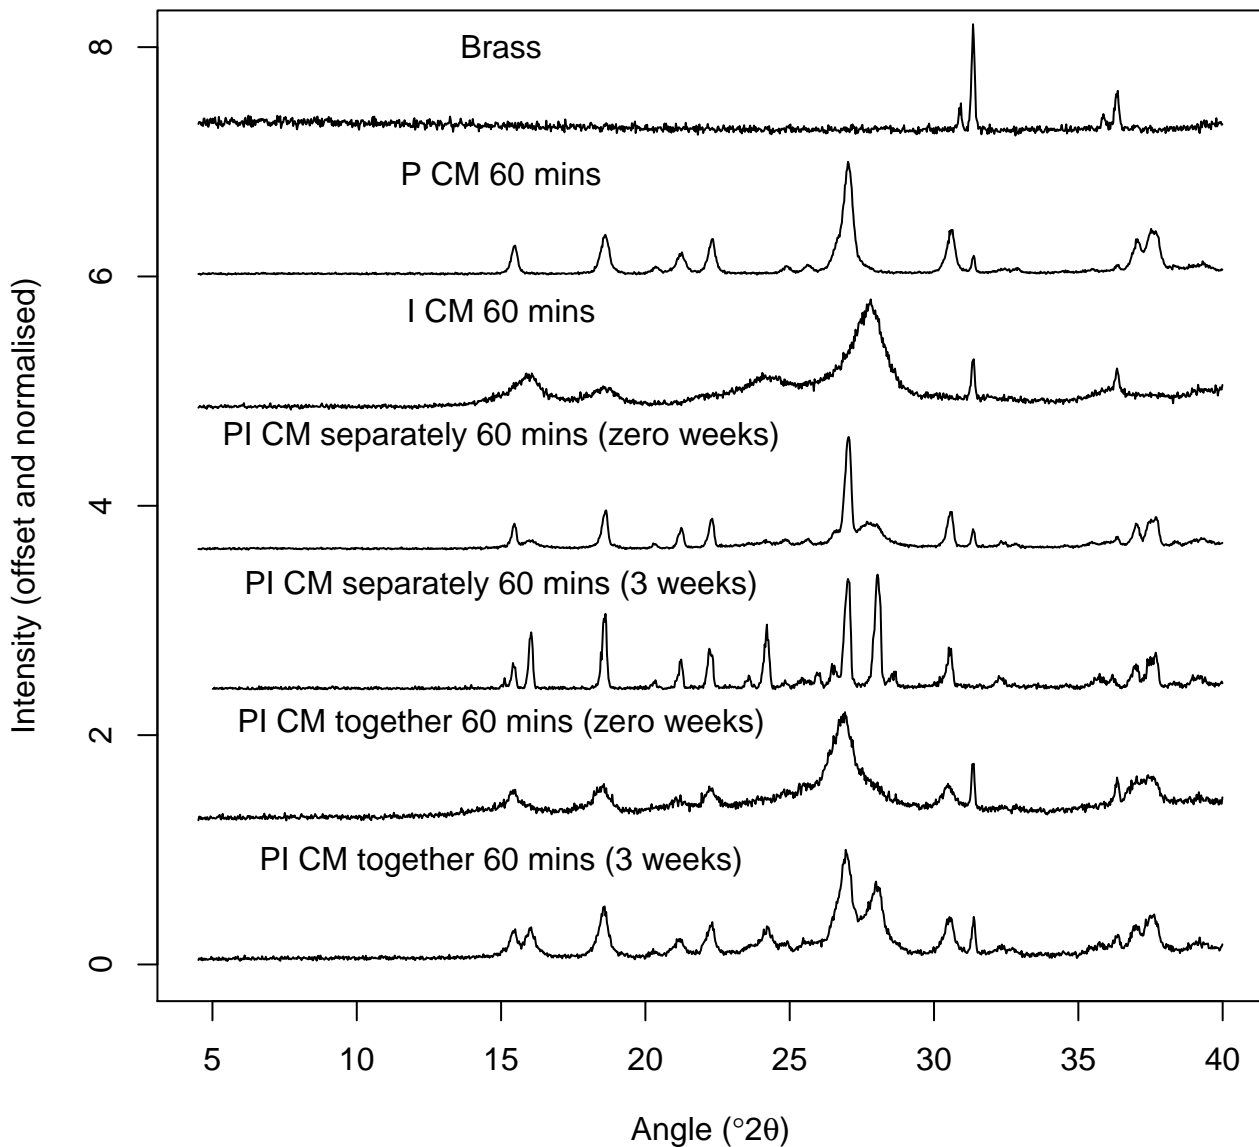

Supplement: s1 [file s1]

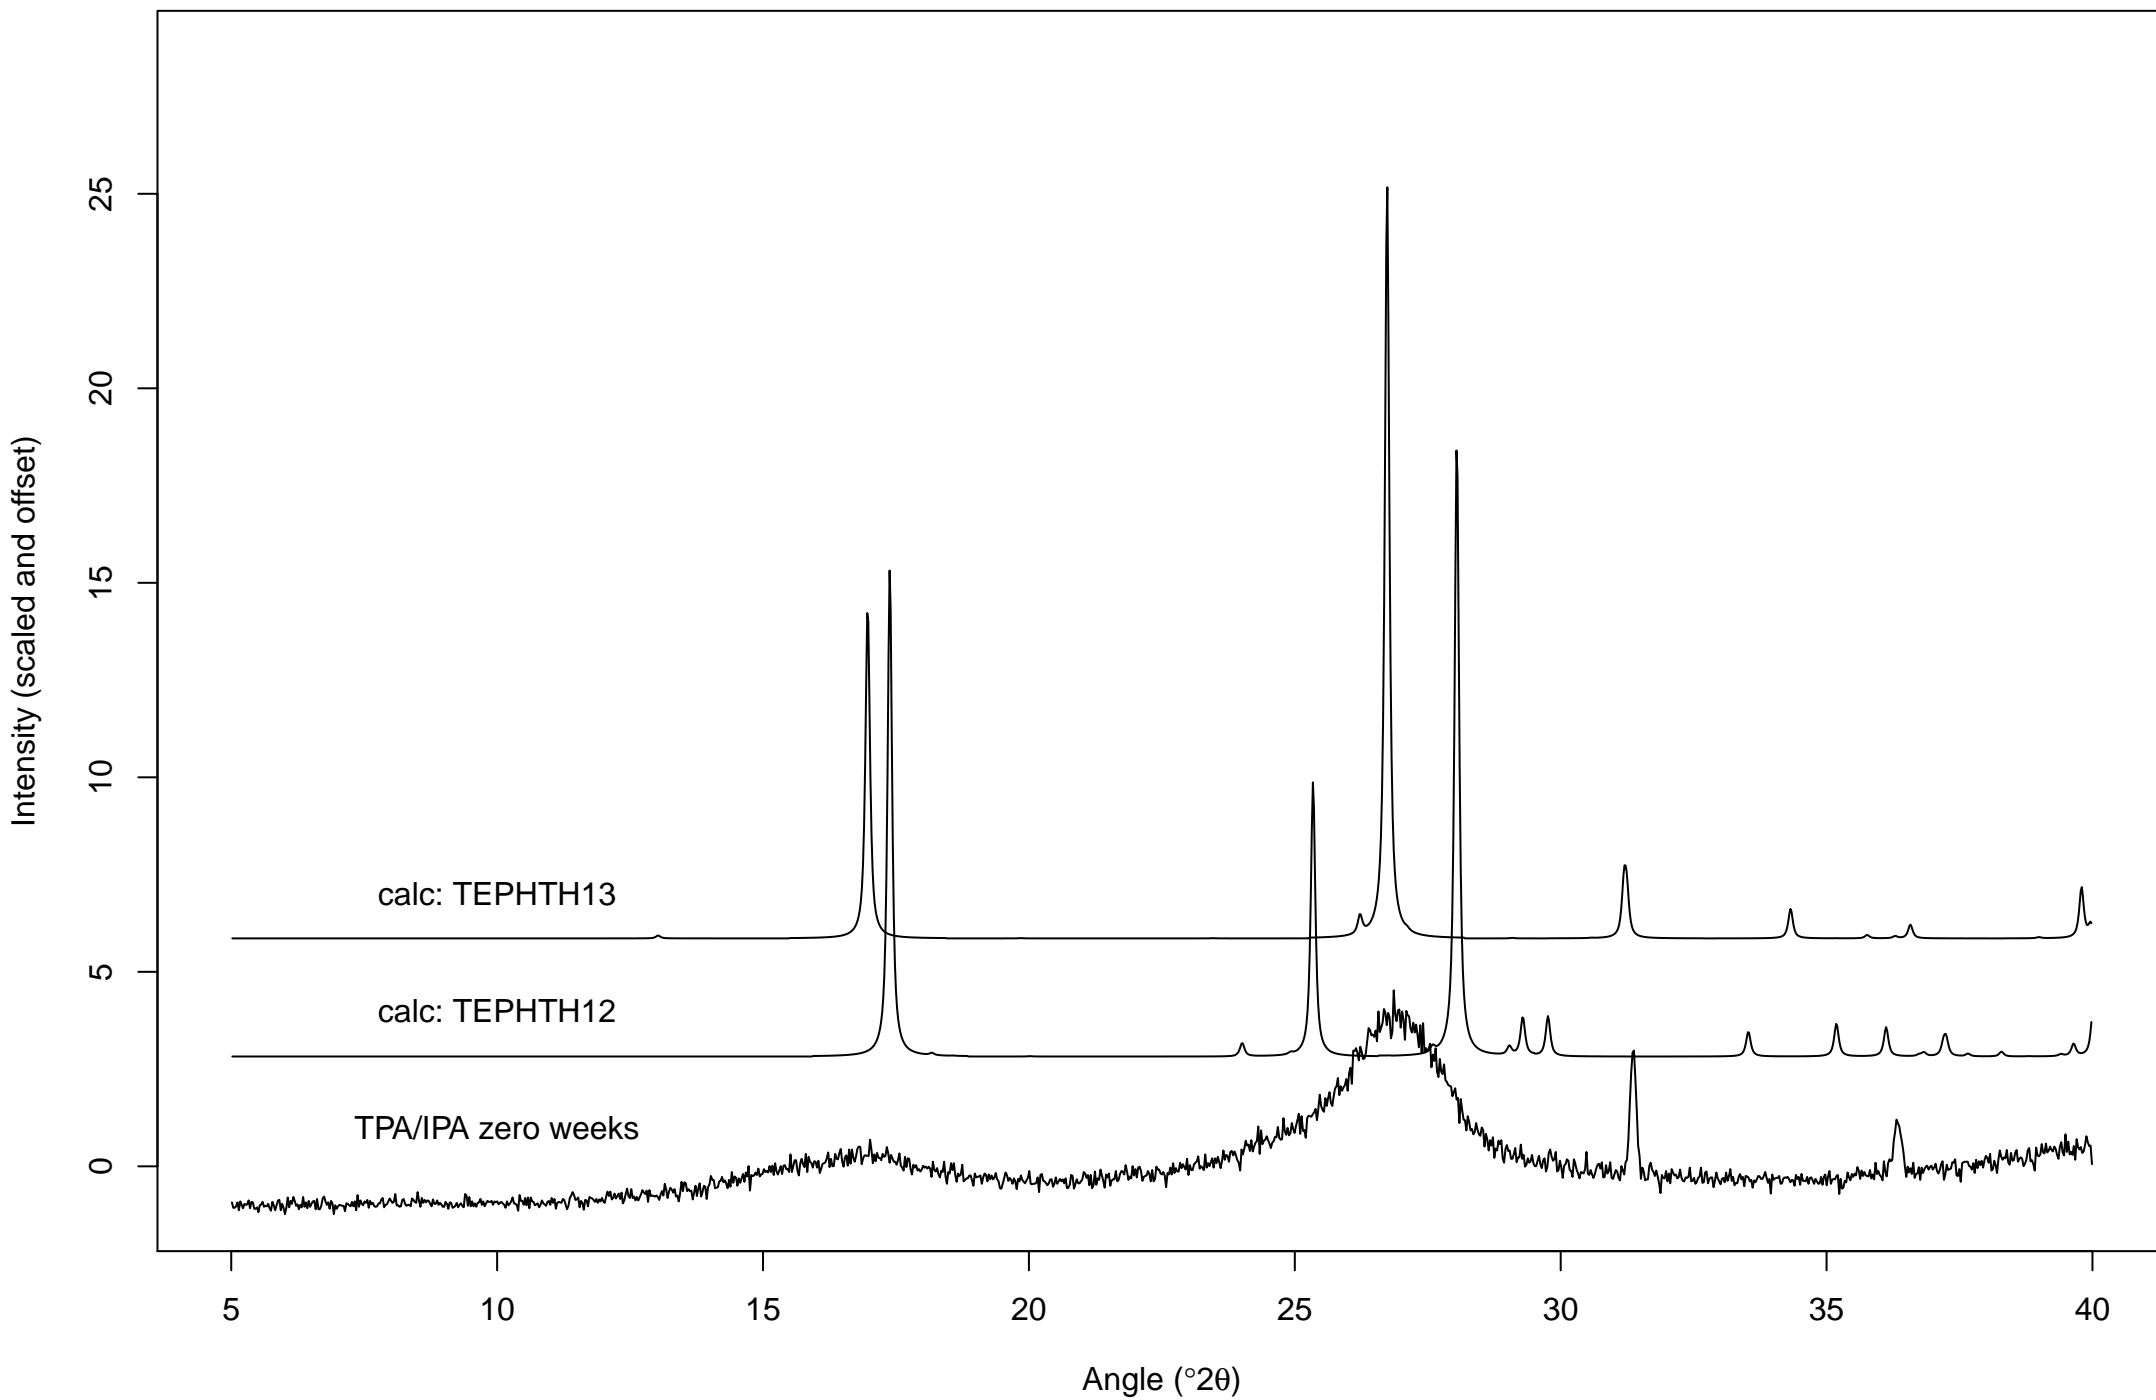

Supplement: s1 [file s1]

TPA

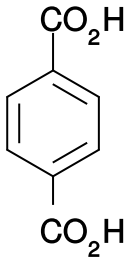

IPA

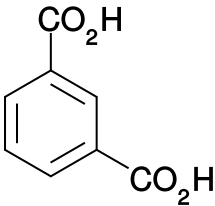

PA

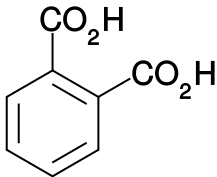

Supplement: s1 [file s1]

**a) Terephthalic + isophthalic acid**

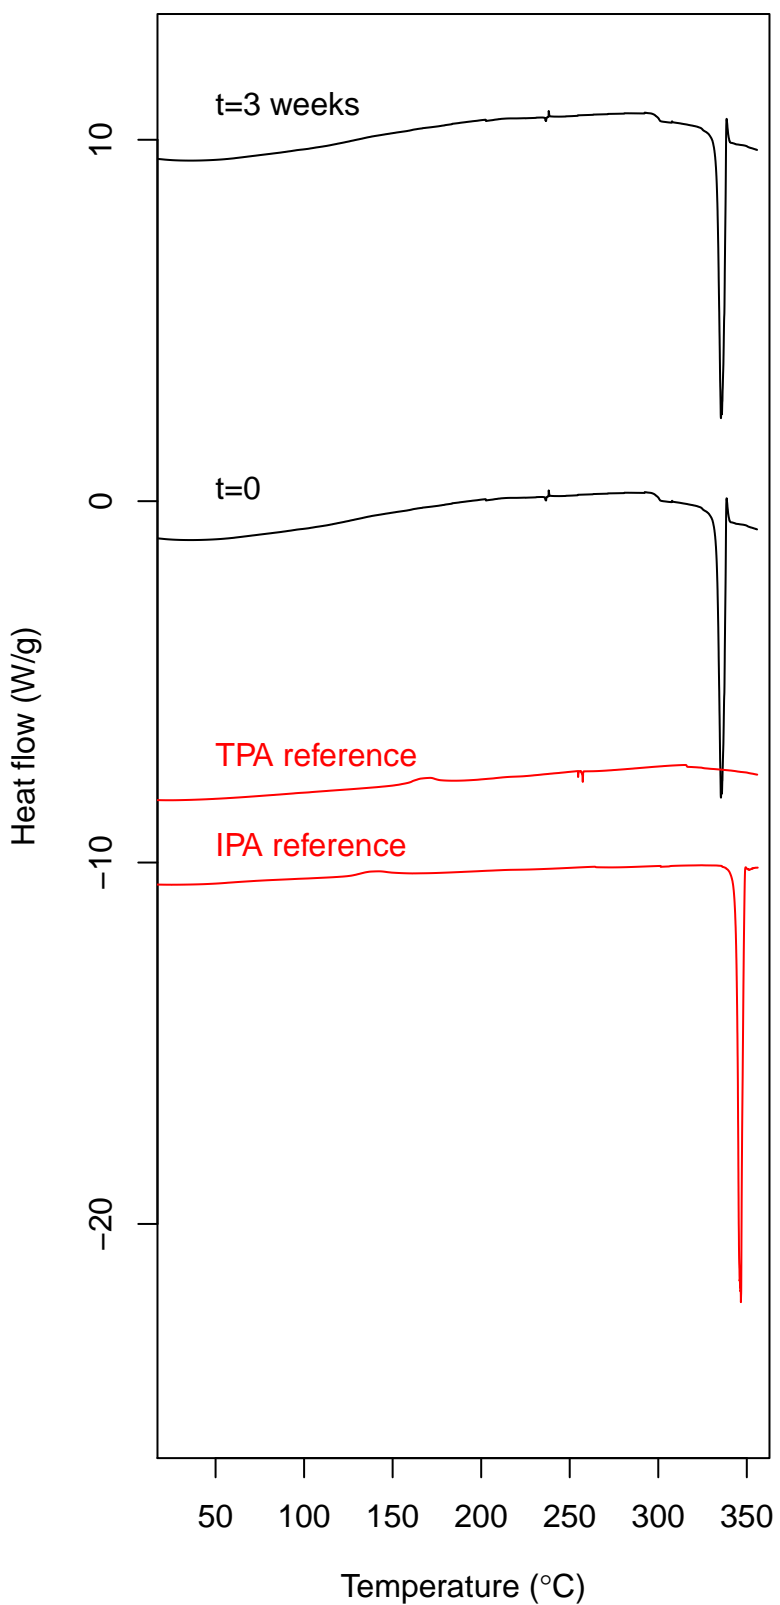

**b) Terephthalic + phthalic acid**

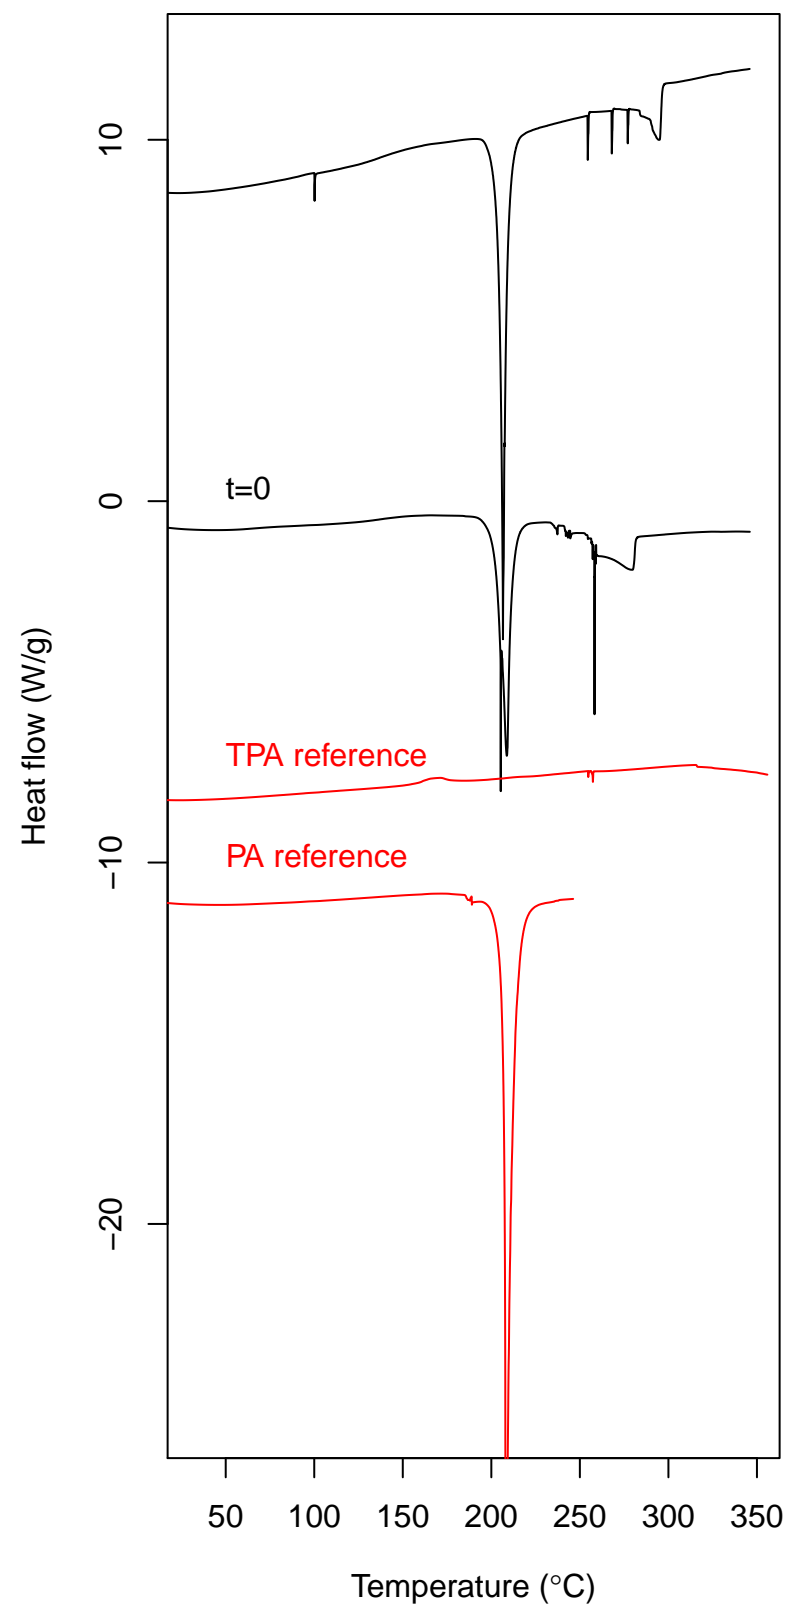

**c) Isophthalic + phthalic acid**

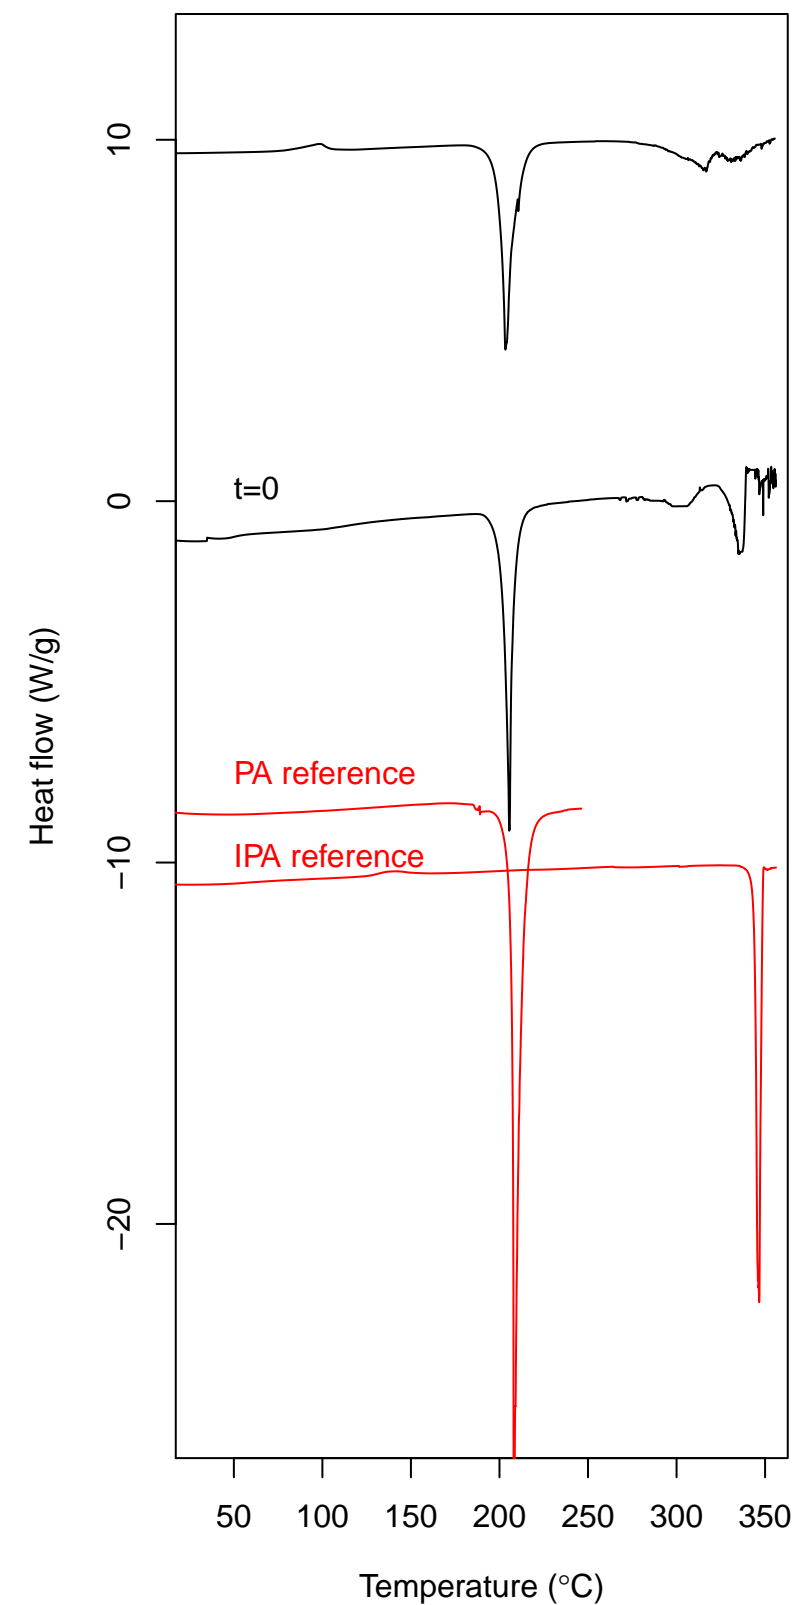

Supplement: s1 [file s1]

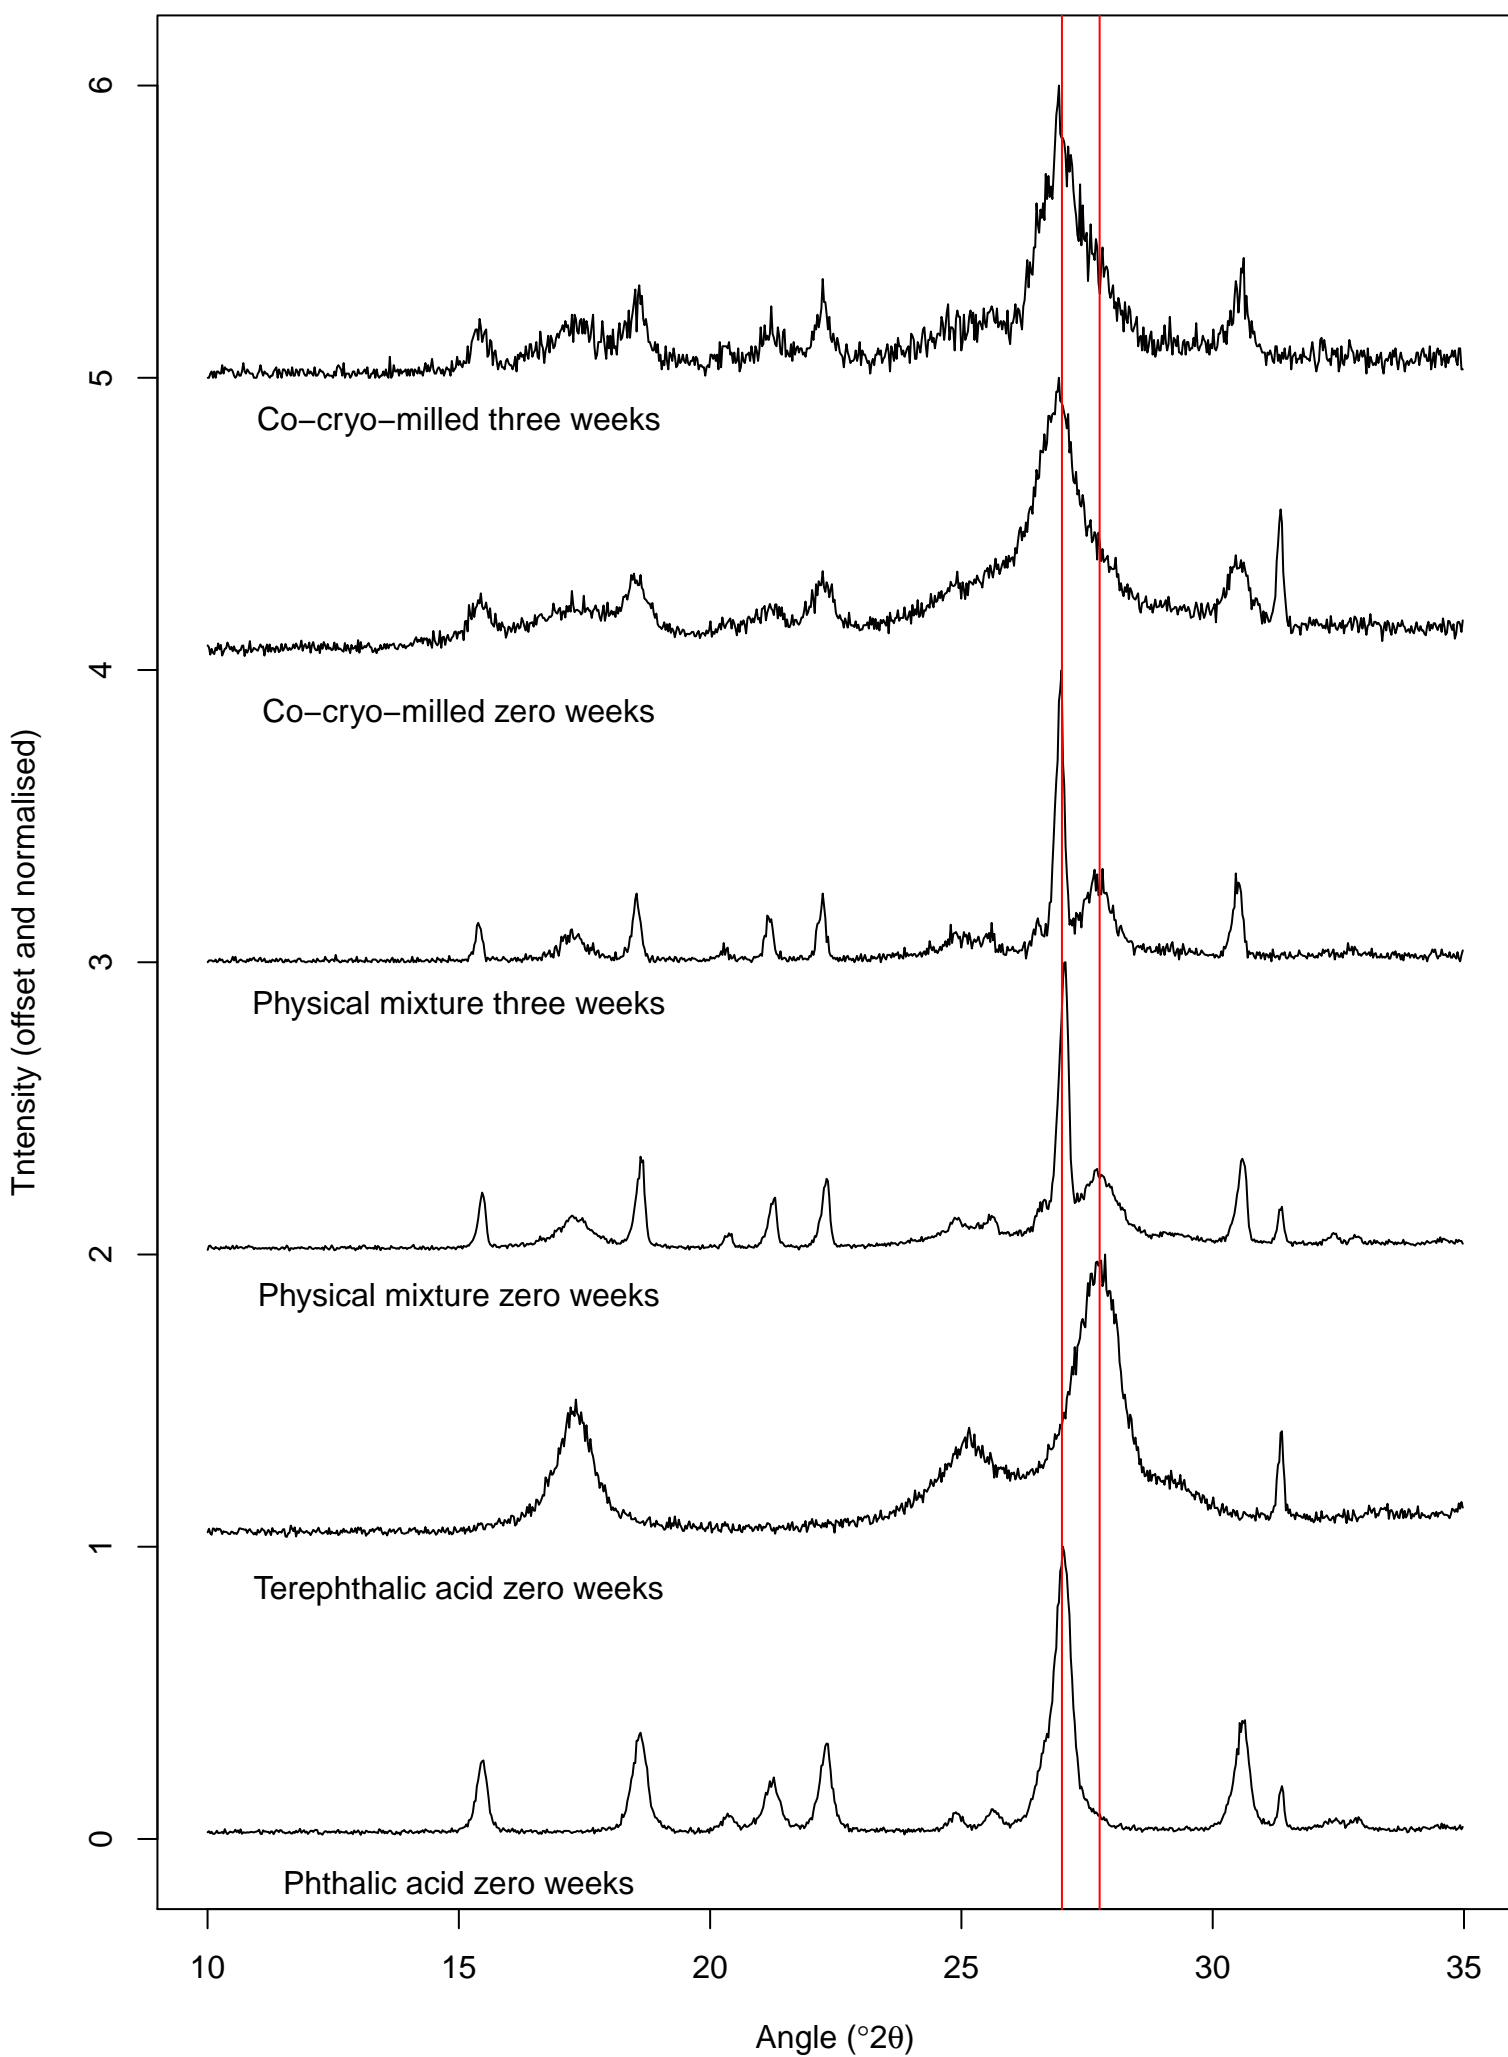

Supplement: s1 [file s1]

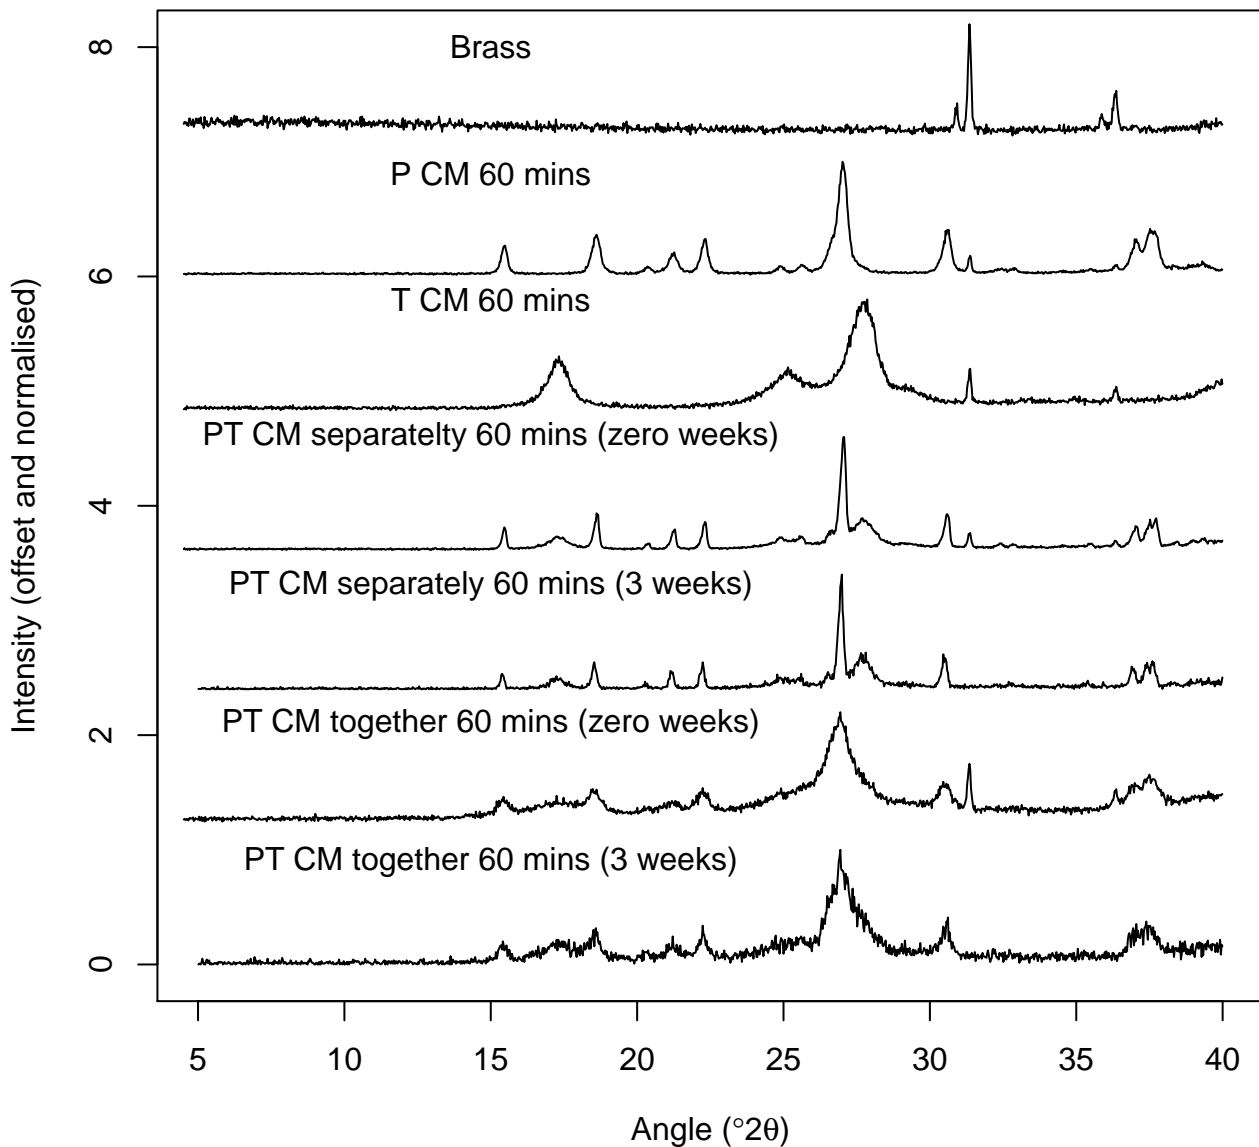

Supplement: s1 [file s1]

**a) Terephthalic + isophthalic acid**



**b) Terephthalic + phthalic acid**



**c) Isophthalic + phthalic acid**



Supplement: s1 [file s1]

**a) Terephthalic acid**

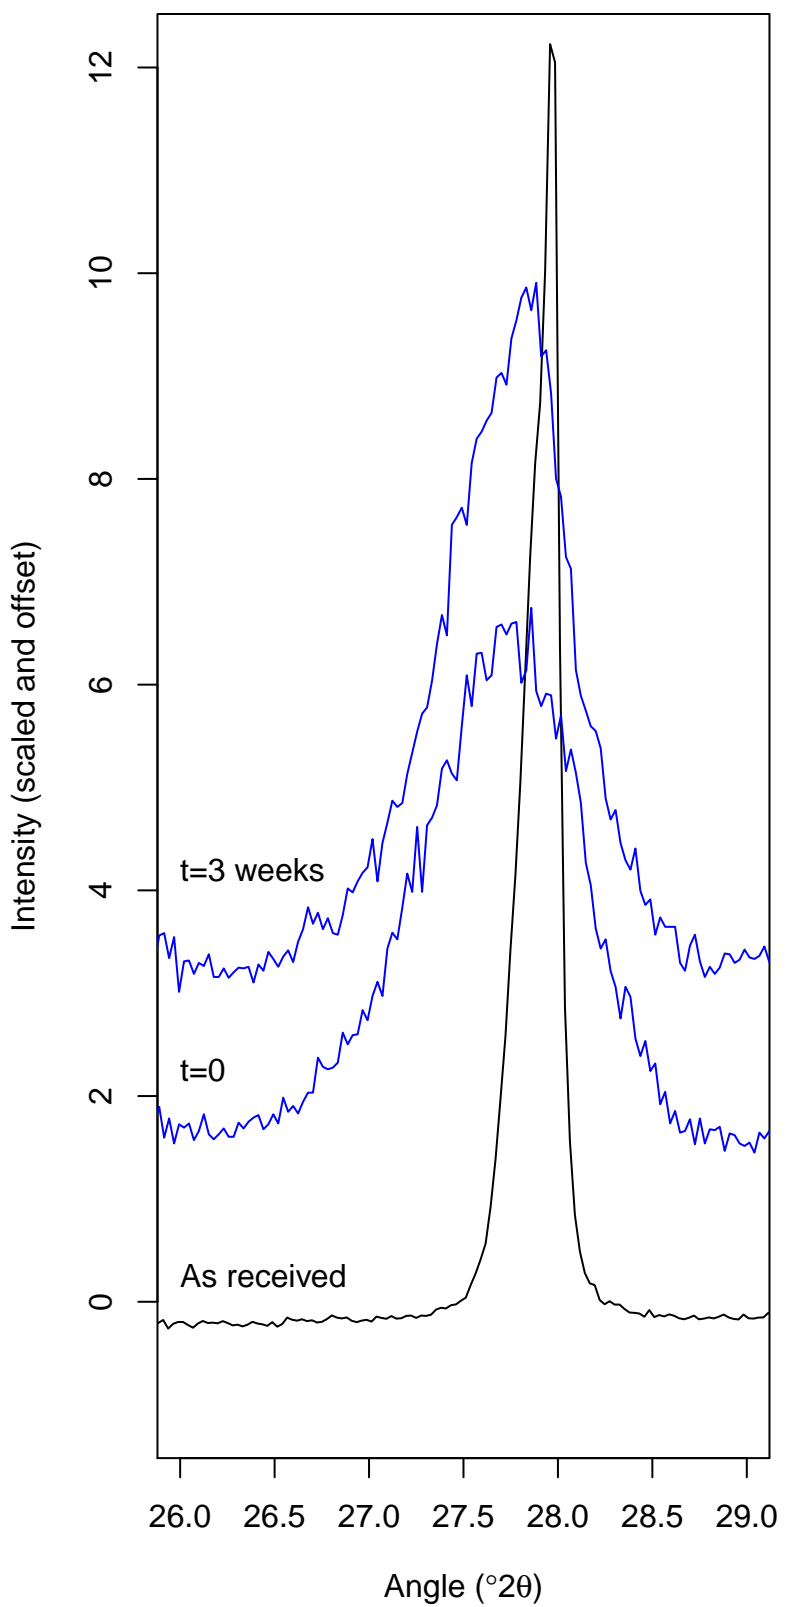

**b) Isophthalic acid**

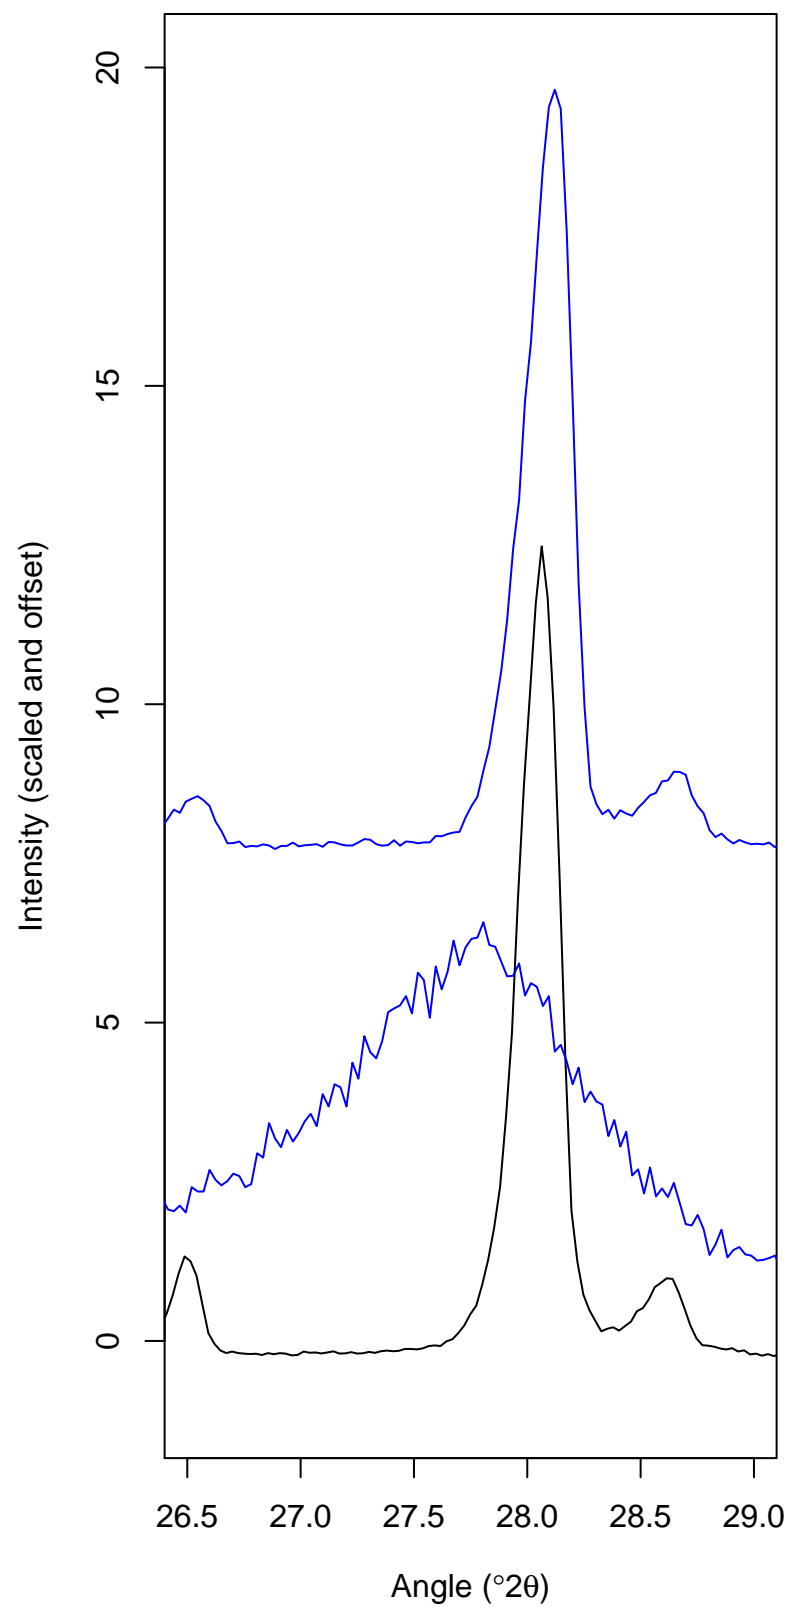

**c) Phthalic acid**

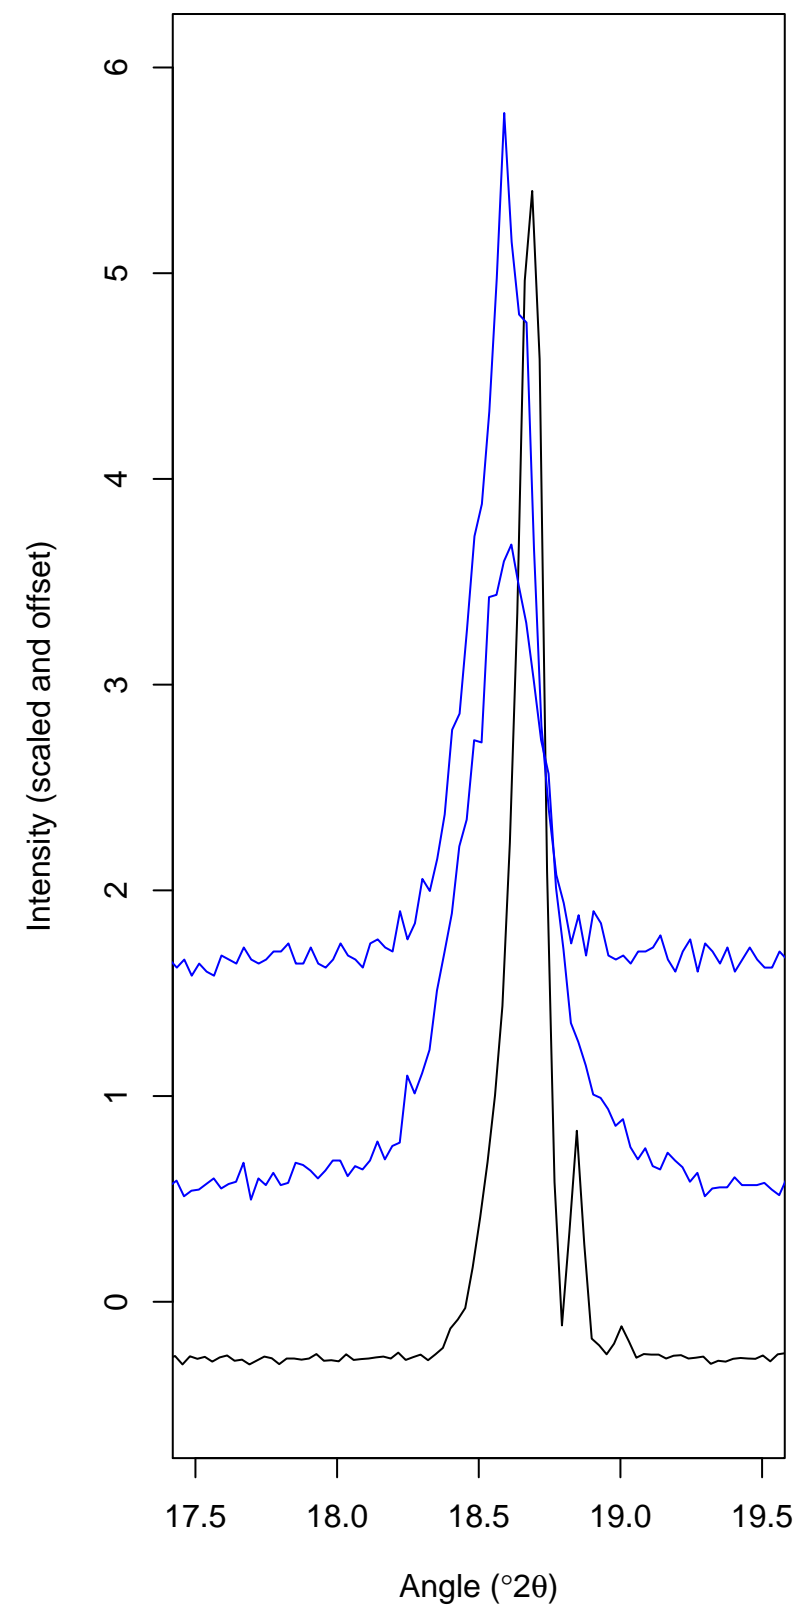

Supplement: s1 [file s1]



Supplement: s1 [file s1]

**a) Terephthalic + isophthalic acid**



**b) Terephthalic + phthalic acid**



**c) Isophthalic + phthalic acid**



Supplement: s1 [file s1]

TPA



IPA



PA



Supplement: s1 [file s1]

**a) Terephthalic acid**

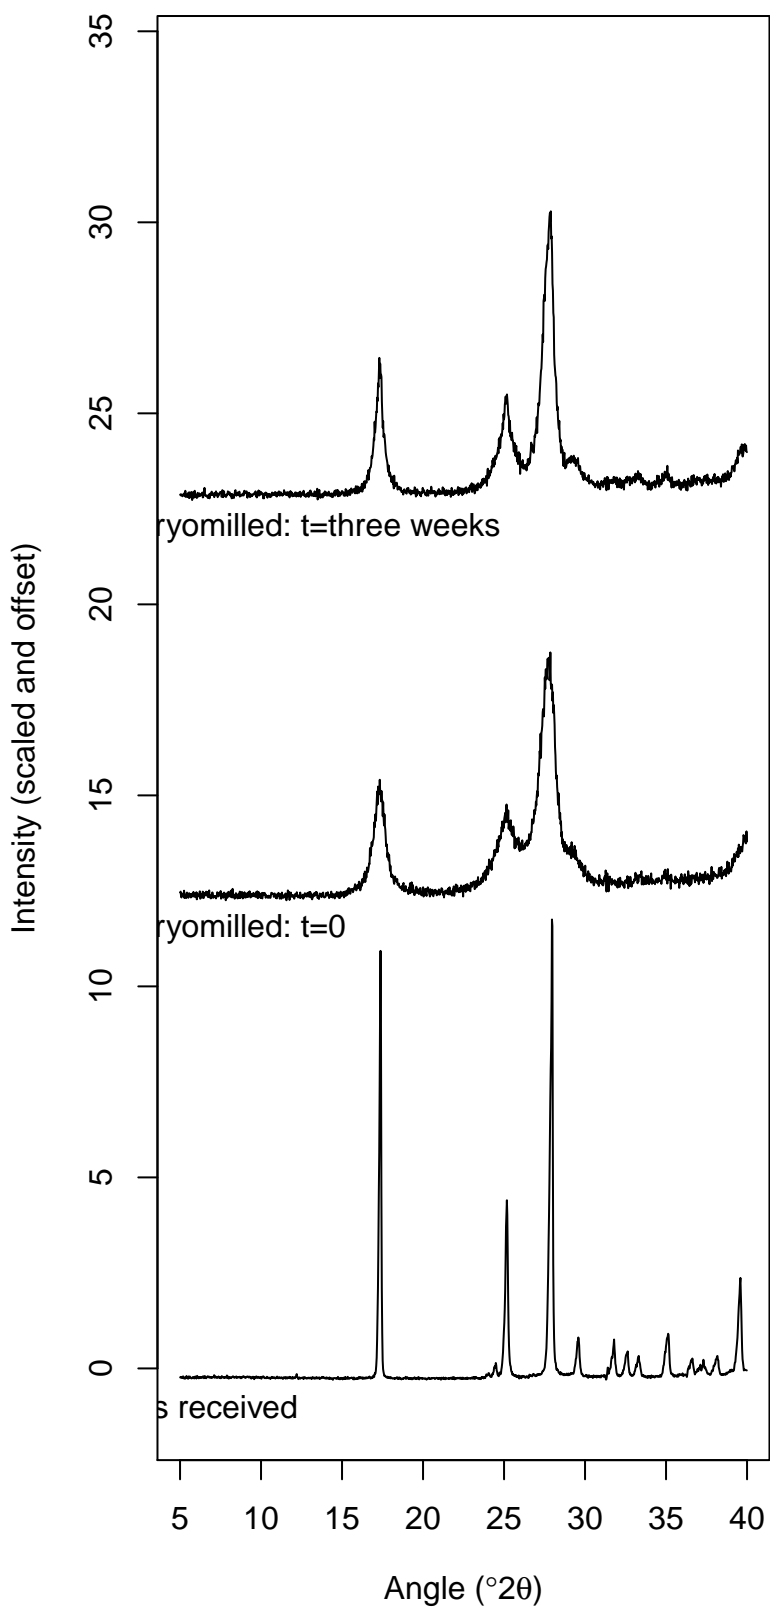

**b) Isophthalic acid**

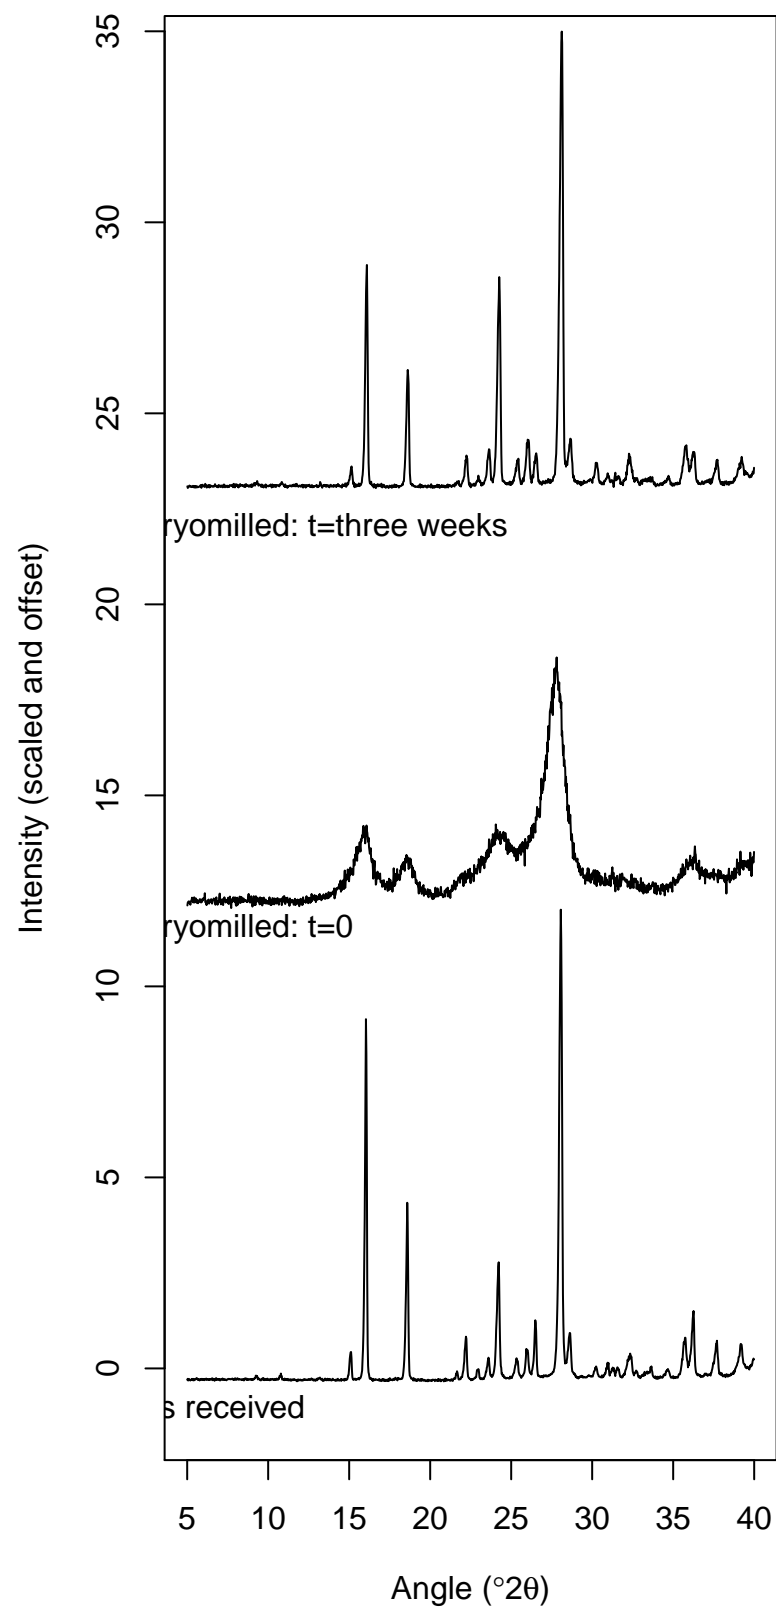

**c) Phthalic acid**

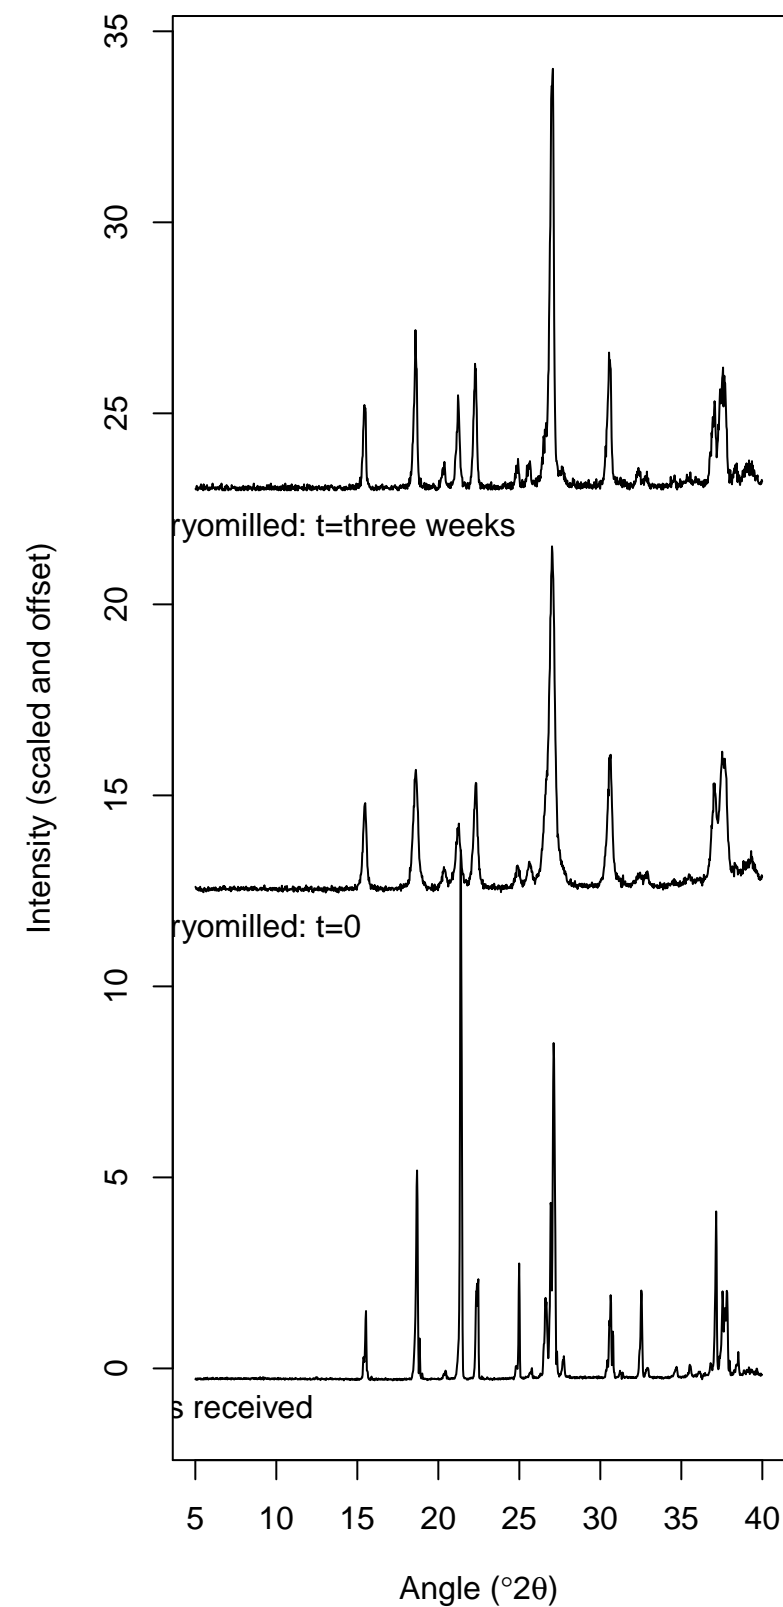

Supplement: s1 [file s1]

**a) Terephthalic acid**



**b) Isophthalic acid**



**c) Phthalic acid**



Supplement: s1 [file s1]

**a) Terephthalic and isophthalic**   **b) Isophthalic and phthalic**   **c) Terephthalic and phthalic**

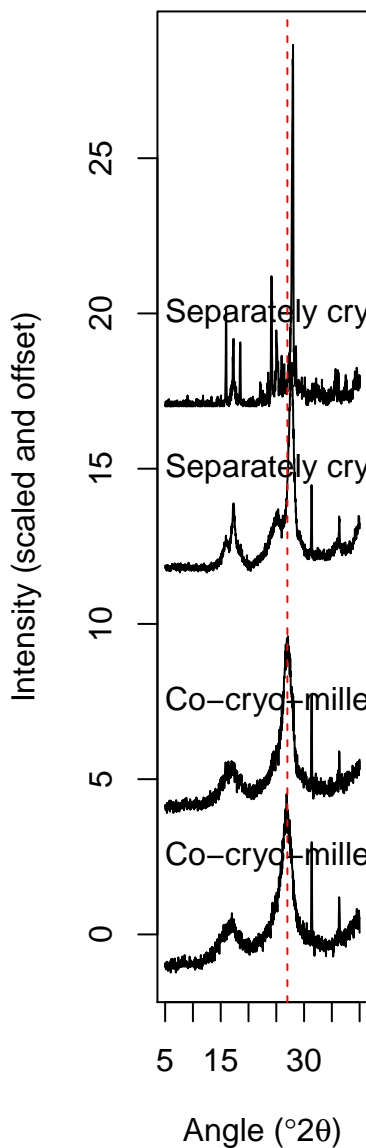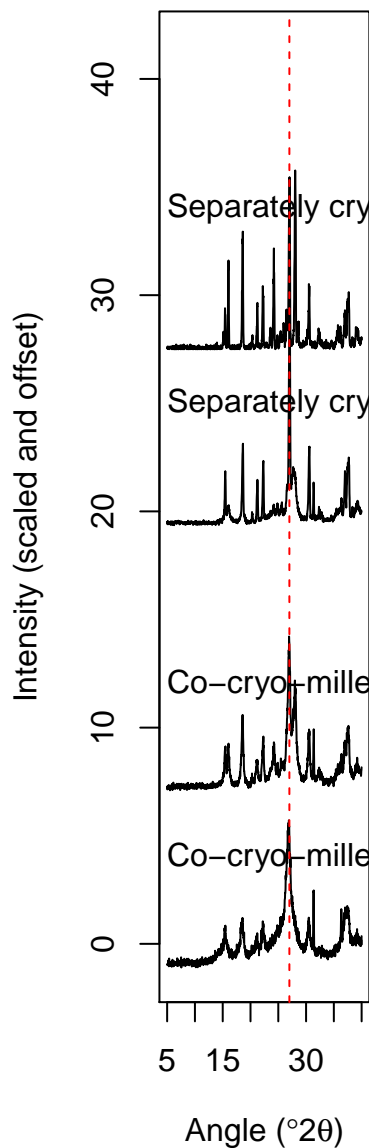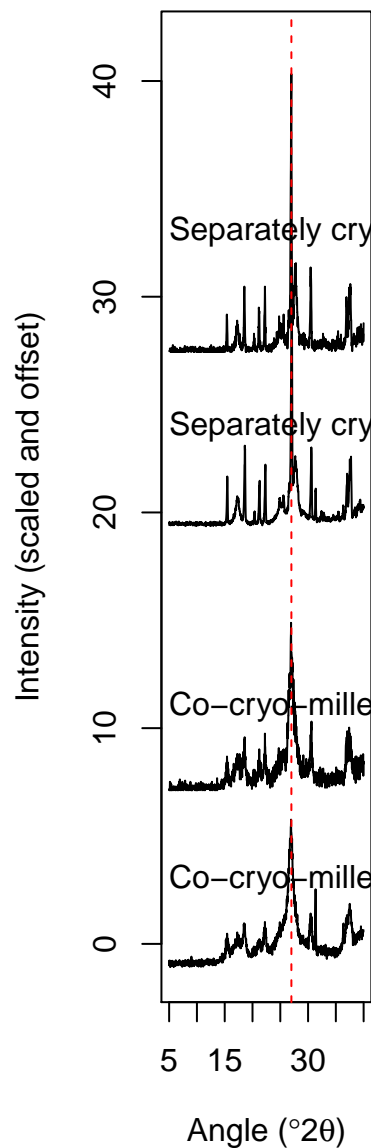

Supplement: s1 [file s1]

**Isophthalic acid cryomilled for 60 mins after 3 weeks**

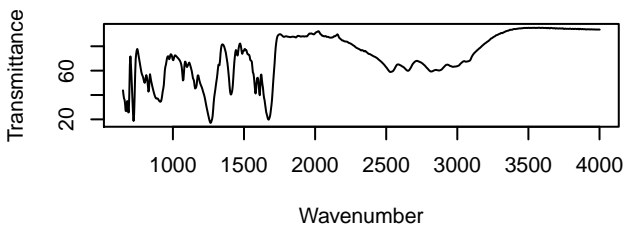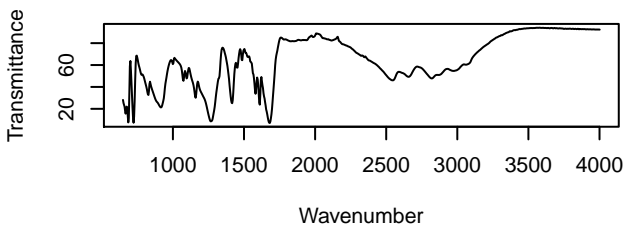

**Isophthalic acid as received**

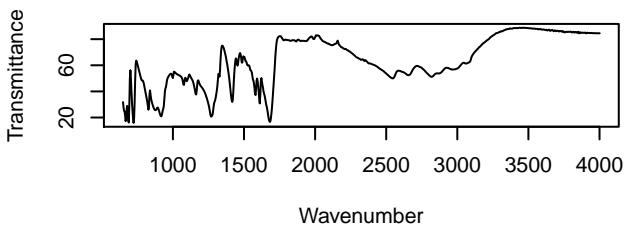

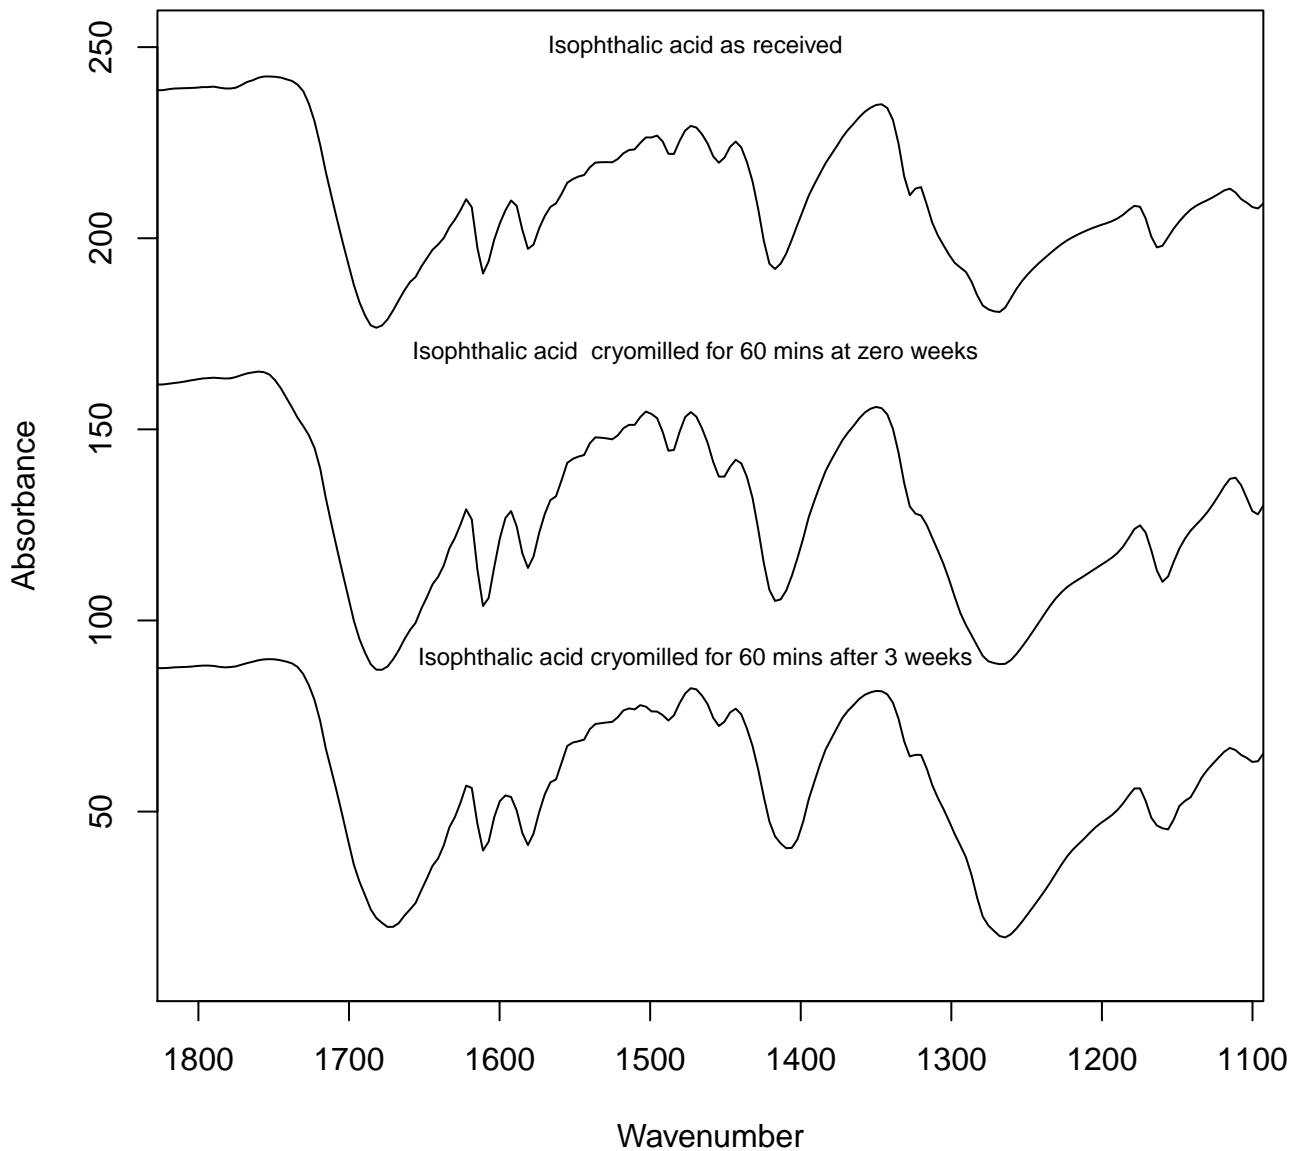

Supplement: s1 [file s1]
